# Supplementary material for: Transcriptional Alterations of Virulence-Associated Genes in Extended Spectrum Beta-Lactamase (ESBL)-Producing Uropathogenic Escherichia coli during Morphologic Transitions Induced by Ineffective Antibiotics
Source: Front Microbiol. 2017 Jun 13;8:1058. doi: 10.3389/fmicb.2017.01058 (PMC5468405; doi:10.3389/fmicb.2017.01058)
Supplement: Supplementary file 4 [file DataSheet1.XLSX]

## Sheet: E7 transcriptome full
ProbeName	[ESBL019 Transition] (raw)	[ESBL019 Coliform](raw)	[ESBL019 Filamentous](raw)	[ESBL019 Reverted](raw)	[ESBL019 Transition](normalized)	[ESBL019 Coliform](normalized)	[ESBL019 Filamentous](normalized)	[ESBL019 Reverted](normalized)	EntrezGeneID	GeneSymbol	Description
A_07_P000003	630.52106	642.96655	204.52808	427.98712	0.05840993	-0.083057165	0.20469975	-0.46507835	947554	ygiF	orf, hypothetical protein [b3054]
A_07_P000008	321.88477	252.70374	91.54743	146.62349	0.22319198	-0.29557097	0.17977524	-0.8757477	947555	htrG	orf, hypothetical protein [b3055]
A_07_P000015	42.419308	41.543743	13.218595	39.085068	0.02673781	-0.17301881	0.11512071	-0.055877805	947553	cca	tRNA nucleotidyl transferase [b3056]
A_07_P000016	889.7725	895.0972	397.38055	500.36627	0.06760216	-0.09345579	0.6752229	-0.7273617	947551	bacA	bacitracin resistance; possibly phosphorylates undecaprenol [b3057]
A_07_P000021	540.5475	456.8564	272.10117	203.10204	0.17041254	-0.24193406	0.95067084	-1.2063153	947544	folB	putative kinase [b3058]
A_07_P000026	256.8533	225.03958	107.74729	250.23358	-0.0074899197	-0.36792243	0.5097524	-0.009671211	947561	ygiH	orf, hypothetical protein [b3059]
A_07_P000033	64.99277	78.58373	21.23776	92.14376	-0.18434918	-0.08006406	-0.027460992	0.35474634	947562	ttdR	putative transcriptional regulator LYSR-type [b3060]
A_07_P000036	23.47449	17.792294	11.026456	27.51029	-0.1555568	-0.7250645	0.5248541	0.10880852	947565	ttdA	L-tartrate dehydratase, subunit A [b3061]
A_07_P000043	63.23393	44.604824	18.18505	116.424644	0.19927406	-0.47389102	0.17186344	1.1153874	947568	ttdB	L-tartrate dehydratase, subunit B [b3062]
A_07_P000047	42.083355	23.238506	12.183181	60.336136	0.15558362	-0.8708153	0.13776028	0.7108444	947576	ttdT	orf, hypothetical protein [b3063]
A_07_P000051	150.51791	157.2555	62.113247	120.6306	0.056953073	-0.049537778	0.55052674	-0.22689784	947578	ygjD	putative O-sialoglycoprotein endopeptidase [b3064]
A_07_P000059	10267.566	8102.6523	2168.7058	4508.1206	0.53940606	0.028112411	0.066753864	-0.6126025	947577	rpsU	30S ribosomal subunit protein S21 [b3065]
A_07_P000065	1946.2448	1593.4158	621.0852	945.0593	0.100755215	-0.357481	0.22346044	-0.9059732	947570	dnaG	DNA biosynthesis; DNA primase [b3066]
A_07_P000070	3524.1885	3616.5356	515.016	2162.1584	0.43233895	0.29998994	-0.571728	-0.23699117	947567	rpoD	RNA polymerase, sigma [b3067]
A_07_P000074	919.7941	647.2262	284.09235	934.8749	0.097914696	-0.57879233	0.17349958	0.15686488	947560	mug	orf, hypothetical protein [b3068]
A_07_P000079	279.56277	326.12738	70.49906	361.54266	-0.027742147	0.024855137	-0.24470353	0.3787396	947582	yqjH	orf, hypothetical protein [b3070]
A_07_P000083	266.68808	399.7491	36.632328	104.29171	0.61164546	1.0259199	-0.4817835	-0.70739555	947584	yqjI	orf, hypothetical protein [b3071]
A_07_P000086	34.77281	28.962992	21.338024	83.467354	-0.47993135	-0.913347	0.5860707	0.81880844	945301	aer	aerotaxis sensor receptor, flavoprotein [b3072]
A_07_P000092	206.1784	252.78151	11.3631935	988.9127	-0.1745789	-0.05024731	-2.5854964	2.1228592	947120	ygjG	probable ornithine aminotransferase [b3073]
A_07_P000096	49.547493	60.941364	20.630949	133.88078	-0.3470161	-0.21807265	0.15951747	1.1225367	946251	ygjH	putative tRNA synthetase [b3074]
A_07_P000102	163.13043	206.89005	40.211796	150.50851	-2.3531914E-4	0.1729368	-0.2500354	-0.08092821	947586	ebgR	regulator of ebg operon [b3075]
A_07_P000106	58.085052	79.16231	21.98584	144.67883	-0.40135133	-0.12437081	-0.03240794	0.9507518	947583	ebgA	evolved beta-D-galactosidase, alpha subunit; cryptic gene [b3076]
A_07_P000114	29.102293	44.418354	12.991411	58.1366	-0.46757782	-0.027220964	0.13938302	0.5662246	947581	ebgC	evolved beta-D-galactosidase, beta subunit; cryptic gene [b3077]
A_07_P000117	30.61068	40.23182	17.265776	59.80278	-0.56678	-0.3421446	0.37763572	0.4348861	947579	ygjI	putative oxidoreductase [b3078]
A_07_P000124	101.660904	98.181366	38.2711	251.04468	-0.16159987	-0.38151014	0.19949818	1.1780673	947597	ygjJ	orf, hypothetical protein [b3079]
A_07_P000129	28.84312	25.084024	15.417062	50.5887	-0.2463659	-0.61749005	0.62047046	0.5997106	947596	ygjK	putative isomerase [b3080]
A_07_P000131	42.26275	126.604324	12.051143	460.81244	-0.30164623	1.1115559	-0.34132737	3.180564	947594	fadH	putative NADPH dehydrogenase [b3081]
A_07_P000138	125.451416	114.244385	70.45764	133.21097	-0.007112503	-0.31178427	0.9311228	0.11495924	947593	ygjM	orf, hypothetical protein [b3082]
A_07_P000142	166.49152	282.08704	130.19623	216.83205	-0.4717517	0.11927402	0.944023	-0.055134296	947591	ygjN	orf, hypothetical protein [b3083]
A_07_P000149	54.301582	72.29124	27.678497	51.08582	-0.10510898	0.13805103	0.69319785	-0.15769231	947589	rlmG	putative enzyme [b3084]
A_07_P000154	117.142235	135.13348	43.12488	134.11346	-0.16177416	-0.12531722	0.16709208	0.06890583	947650	ygjP	orf, hypothetical protein [b3085]
A_07_P000160	20.268011	18.302149	12.4305315	27.27558	-0.272362	-0.58921957	0.79285693	0.19153154	947598	ygjQ	orf, hypothetical protein [b3086]
A_07_P000165	571.02783	1004.43396	66.19334	1495.6743	-0.13527489	0.509809	-1.473542	1.2893765	947600	ygjR	orf, hypothetical protein [b3087]
A_07_P000170	1014.3183	207.32555	452.17303	188.56107	1.2139993	-1.2462089	1.8189702	-1.1779202	947607	alx	putative transport protein [b3088]
A_07_P000173	1922.1821	2268.488	155.48238	782.62476	0.5842676	0.65358734	-1.2731184	-0.67659664	947605	sstT	putative transport protein [b3089]
A_07_P000176	28.759892	28.448324	19.46667	37.621147	-0.19080365	-0.37618434	1.0166798	0.23216999	947604	ygjV	orf, hypothetical protein [b3090]
A_07_P000185	55.909767	44.175037	17.088852	92.77619	-0.038440228	-0.5479758	0.022050917	0.7277025	947603	uxaA	altronate hydrolase [b3091]
A_07_P000188	75.93957	63.862843	20.299017	168.25677	0.19972563	-0.21981514	0.06681943	1.3829551	947599	uxaC	uronate isomerase [b3092]
A_07_P000192	86.64182	57.480274	22.882978	207.21785	0.10030246	-0.66136086	-0.049951255	1.3938031	947601	exuT	transport of hexuronates [b3093]
A_07_P000199	554.54474	527.30115	224.0428	684.1293	-0.19499254	-0.437335	0.26801443	0.14346218	947602	exuR	negative regulator of exu regulon, exuT, uxaAC, and uxuB [b3094]
A_07_P000202	3241.837	2710.6797	1891.9513	2692.0764	0.1424365	-0.28538656	1.1360352	-0.090167284	947643	yqjA	orf, hypothetical protein [b3095]
A_07_P000206	442.81192	503.72412	226.14601	685.74927	-0.2763238	-0.26004958	0.52477276	0.39015222	947619	yqjB	orf, hypothetical protein [b3096]
A_07_P000212	4814.074	4624.5967	434.8505	7418.0874	0.046872616	-0.18072534	-1.651259	0.7061498	947622	yqjC	orf, hypothetical protein [b3097]
A_07_P000219	3194.6396	2829.3618	331.27188	5273.029	0.14204192	-0.20280075	-1.3569877	0.9005084	947614	yqjD	orf, hypothetical protein [b3098]
A_07_P000224	5992.814	4955.371	600.37897	10033.356	0.22713351	-0.21677399	-1.32162	1.0061195	947611	yqjE	orf, hypothetical protein [b3099]
A_07_P000229	4348.183	3498.6787	471.97775	6315.2295	0.2017386	-0.28152966	-1.2313478	0.77564955	947610	yqjK	orf, hypothetical protein [b3100]
A_07_P000235	7.2939663	5.3235664	3.1635776	8.539978	0.055550218	-0.5684267	0.6209389	0.31856668	947608	yqjF	orf, hypothetical protein [b3101]
A_07_P000240	328.62256	250.68092	59.13262	398.9442	0.22396111	-0.3362838	-0.47990835	0.5392051	947615	yqjG	putative transferase [b3102]
A_07_P000243	1059.4733	1047.974	233.4269	1620.9441	0.0714376	-0.11397362	-0.34033155	0.72041273	947617	yhaH	putative cytochrome [b3103]
A_07_P000250	31.836334	40.609684	9.737231	32.821636	-0.17239106	0.009092569	-0.11094618	-0.09292984	947612	yhaI	putative cytochrome [b3104]
A_07_P000254	993.62933	1404.0731	333.8267	764.5785	-0.12128091	0.20789099	0.07564688	-0.46383643	947621	yhaJ	putative transcriptional regulator LYSR-type [b3105]
A_07_P000257	41.807564	59.56639	12.697159	47.793358	-0.213709	0.12735915	-0.16243201	0.014825463	947620	yhaK	orf, hypothetical protein [b3106]
A_07_P000264	192.23499	279.68146	116.76944	329.60742	-0.6799048	-0.30865788	0.37142217	0.13346076	947618	yhaL	orf, hypothetical protein [b3107]
A_07_P000269	56.249874	60.550076	30.357492	99.999596	-0.40327942	-0.46666622	0.47745848	0.46228087	2847723	yhaM	orf, hypothetical protein [b3108]
A_07_P000272	48.36946	51.06735	12.524715	120.60744	0.18589735	0.09453583	0.007113993	1.539536			orf, hypothetical protein [b3109]
A_07_P000276	25.094082	21.868362	8.853415	35.608685	-0.0893656	-0.45753396	0.17812848	0.4510045	947628	yhaO	putative transport system permease protein [b3110]
A_07_P000282	387.4681	587.31604	31.81455	1200.9714	-0.13279212	0.2976011	-1.9685752	1.5347488			putative L-serine dehydratase [b3111]
A_07_P000290	649.4471	1448.0149	66.525154	3095.6228	-0.37347507	0.61365104	-1.8901798	1.9149594			putative L-serine dehydratase [b3112]
A_07_P000294	391.8746	858.7201	49.17537	2491.5032	-0.42255366	0.53957677	-1.6464022	2.2814867	947624	tdcF	orf, hypothetical protein [b3113]
A_07_P000296	129.9943	218.44608	16.28262	593.39685	-0.11614561	0.4630164	-1.3426541	2.1098914	947623	tdcE	probable formate acetyltransferase 3 [b3114]
A_07_P000305	21.884203	27.055342	5.0512815	169.47142	-0.18197036	-0.04561305	-0.5266035	2.8065984	947635	tdcD	putative kinase [b3115]
A_07_P000306	171.11205	177.58353	27.6537	1523.5481	0.12757313	0.011464238	-0.73128784	3.3174834	947629	tdcC	anaerobically inducible L-threonine, L-serine permease [b3116]
A_07_P000312	115.99856	82.94593	20.575674	2701.5566	0.37251413	-0.28101552	-0.35204542	4.9496145	947633	tdcB	threonine dehydratase, catabolic [b3117]
A_07_P000316	32.632633	28.580757	13.0378275	342.33472	-0.29365766	-0.65459514	0.15326601	3.1328506	947494	tdcA	transcriptional activator of tdc operon [b3118]
A_07_P000323	16.17347	13.114047	16.071966	39.5353	-0.57809925	-1.0502821	1.1833532	0.7469009	944907	tdcR	threonine dehydratase operon activator protein [b3119]
A_07_P000330	90.88432	57.599915	51.166557	62.575085	0.12736332	-0.7002673	1.0690687	-0.37559164	947705	yhaB	orf, hypothetical protein [b3120]
A_07_P000331	11.673796	8.841476	6.8782115	15.943776	-0.25967097	-0.8302518	0.7476964	0.2255367	947557	yhaC	orf, hypothetical protein [b3121]
A_07_P000340	15.131266	13.711796	8.089701	17.442213	-0.07598543	-0.3877666	0.7911761	0.16455352			orf, hypothetical protein [b3122]
A_07_P000343	185.56526	213.15137	82.30071	309.3737	-0.20139956	-0.17111385	0.39618647	0.57151353	947632	garK	orf, hypothetical protein [b3124]
A_07_P000346	108.40169	138.94284	25.689747	288.7808	-0.07279217	0.11564636	-0.3793794	1.3762834	947631	garR	putative dehydrogenase [b3125]
A_07_P000355	78.344444	84.882454	16.843584	173.68744	-0.008671284	-0.06270194	-0.45576805	1.1754068	947630	garL	orf, hypothetical protein [b3126]
A_07_P000357	164.6762	194.71675	98.74153	297.02673	-0.42363703	-0.3515587	0.6089952	0.4628122	947642	garP	putative transport protein [b3127]
A_07_P000361	105.44274	92.98353	24.16608	200.905	0.16392314	-0.1871562	-0.1909455	1.1294652	947641	garD	putative hydrolase [b3128]
A_07_P000370	463.3394	441.46454	131.70613	588.56635	-0.02753234	-0.26697063	-0.07174361	0.3530922	947639	sohA	putative protease; htrA suppressor protein [b3129]
A_07_P000373	1411.8082	1326.3038	411.4067	1772.2162	-0.029793978	-0.2895937	-0.038166285	0.33370423	947638	yhaV	orf, hypothetical protein [b3130]
A_07_P000379	61.361523	93.15268	35.25234	94.22271	-0.47630882	-0.043712497	0.4946108	0.1779195	947636	agaR	putative DEOR-type transcriptional regulator of aga operon [b3131]
A_07_P000381	11.752819	8.813026	5.274218	122.09053	-0.5483097	-1.1332734	0.06624818	2.8640509	947637	kbaZ	putative tagatose 6-phosphate kinase 2 [b3132]
A_07_P000390	31.327868	18.924755	9.310367	309.8909	-0.03890097	-0.9357394	-0.01890266	3.302829	947648	agaV	PTS system, cytoplasmic, N-acetylgalactosamine-specific IIB component 2 [b3133]
A_07_P000391	56.484802	40.109894	9.9397	631.031	0.36131132	-0.30225956	-0.37474126	3.8785748	947647	agaW	PTS system N-acetylgalactosameine-specific IIC component 2 [b3134]
A_07_P000396	131.40372	112.65308	28.71694	242.02385	0.14899921	-0.24278629	-0.2744974	1.0656306	947646	agaA	putative N-acetylgalactosamine-6-phosphate deacetylase [b3135]
A_07_P000404	75.526184	71.80573	30.71871	330.93854	-0.35564518	-0.59818935	0.11703122	1.811358	947645	agaS	putative tagatose-6-phosphate aldose/ketose isomerase [b3136]
A_07_P000407	20.0506	18.717724	9.672679	453.814	-0.20406139	-0.47296822	0.51481575	4.33181	947644	kbaY	tagatose-bisphosphate aldolase 2 [b3137]
A_07_P000415	30.136635	31.507784	10.5916605	190.44917	-0.10933423	-0.21481025	0.15261161	2.5859702	947653	agaB	PTS system, cytoplasmic, N-acetylgalactosamine-specific IIB component 1 [b3138]
A_07_P000420	31.35308	41.705616	10.175981	95.96995	-0.13522792	0.10674071	0.011868715	1.5142359	947652	agaC	PTS system N-acetylgalactosamine-specific IIC component 1 [b3139]
A_07_P000422	214.6684	227.38478	38.128517	305.96466	0.05203569	-0.034605145	-0.6705967	0.59877956	947649	agaD	PTS system, N-acetylglucosamine enzyme IID component 1 [b3140]
A_07_P000426	49.74003	50.46969	15.50264	111.5515	-0.078633785	-0.2272898	0.0100085735	1.1220855	947985	agaI	putative galactosamine-6-phosphate isomerase [b3141]
A_07_P000434	8.99131	5.5804796	3.4623473	6.114189	0.29243994	-0.565369	0.6861942	-0.22844243	947658	yraH	putative fimbrial-like protein [b3142]
A_07_P000439	22.37536	18.740784	11.280378	21.013697	-0.08534992	-0.5107459	0.69709	-0.14044261	947657	yraI	putative chaperone [b3143]
A_07_P000441	12.156024	7.7643714	3.8720706	13.822226	-0.028763652	-0.84516025	0.09127748	0.19204319	947656	yraJ	putative outer membrane protein [b3144]
A_07_P000449	95.30412	77.77287	253.93352	95.77279	-0.06817341	-0.53111124	3.1162024	-0.025607824	947654	yraK	putative fimbrial protein [b3145]
A_07_P000455	519.1955	621.155	122.884186	391.8663	0.14696765	0.23597717	-0.16147482	-0.22345924	947664	yraL	orf, hypothetical protein [b3146]
A_07_P000458	984.389	973.0664	233.19463	530.8008	0.24445081	0.0580945	-0.06270802	-0.6111188	947663	yraM	putative glycosylase [b3147]
A_07_P000461	1312.4264	1569.815	247.50829	681.23346	0.4052651	0.49395728	-0.23088753	-0.50526166	947662	yraN	orf, hypothetical protein [b3148]
A_07_P000466	494.08127	677.03546	166.32372	355.63715	-0.058680534	0.22613692	0.141101	-0.49753308	947661	diaA	orf, hypothetical protein [b3149]
A_07_P000475	298.7053	309.81104	102.28551	192.85063	0.002265215	-0.11473584	0.22667956	-0.59348583	947659	yraP	putative periplasmic protein [b3150]
A_07_P000479	203.84605	241.64018	108.2159	271.47235	-0.1882025	-0.11248875	0.66876554	0.26061118	947668	yraQ	orf, hypothetical protein [b3151]
A_07_P000481	63.204006	100.09807	20.551153	148.8983	-0.2723174	0.22134185	-0.12257868	0.99940944	947667	yraR	orf, hypothetical protein [b3152]
A_07_P000486	154.75398	59.393726	13.032761	279.64575	0.64206445	-0.9091965	-1.1571625	1.5311761	947666	yhbO	orf, hypothetical protein [b3153]
A_07_P000491	120.88664	196.92558	102.35591	183.28862	-0.6128478	-0.07851803	0.91762733	0.023102641	947665	yhbP	orf, hypothetical protein [b3154]
A_07_P000496	271.37027	303.65198	139.37265	285.00574	-0.23954022	-0.2470504	0.56968	-0.13332331	947671	yhbQ	orf, hypothetical protein [b3155]
A_07_P000501	1944.9714	1801.029	552.5863	2347.3906	0.010583162	-0.27001095	-0.03435898	0.31737924	947670	yhbS	orf, hypothetical protein [b3156]
A_07_P000510	3490.6233	4444.039	686.8176	4093.2825	0.015177488	0.19389892	-0.55977273	0.28043914	947669	yhbT	orf, hypothetical protein [b3157]
A_07_P000511	278.2363	263.10547	28.375265	93.15918	0.84587336	0.59553766	-0.6771965	-0.6971799	949115	yhbU	putative collagenase [b3158]
A_07_P000516	307.1542	266.97418	29.33994	154.76591	0.7358116	0.36388147	-0.8816788	-0.21757674	949117	yhbV	orf, hypothetical protein [b3159]
A_07_P000523	74.60725	89.142654	22.959707	76.39134	-0.1131897	-0.026055813	-0.042865932	-0.04360807	947677	yhbW	putative enzyme [b3160]
A_07_P000526	167.87671	335.17374	74.26564	140.23595	-0.46276057	0.36508036	0.13113964	-0.68681836	947675	mtr	tryptophan-specific transport protein [b3161]
A_07_P000534	8685.157	12682.07	1385.3082	1766.7853	0.4316361	0.8081374	-0.44617224	-1.8302994	947674	deaD	inducible ATP-independent RNA helicase [b3162]
A_07_P000538	36226.82	47267.676	7847.1494	12531.286	0.22411728	0.43824697	-0.21216488	-1.2719188	947673	nlpI	putative control proteins [b3163]
A_07_P000545	2183.7878	3300.6135	429.9514	1188.9916	0.3274026	0.75363755	-0.24664879	-0.51420283	947672	pnp	polynucleotide phosphorylase; cytidylate kinase activity [b3164]
A_07_P000550	33593.32	40365.49	8051.0503	10884.607	0.23022842	0.32550883	-0.06016159	-1.3601696	947686	rpsO	30S ribosomal subunit protein S15 [b3165]
A_07_P000554	3824.444	5073.439	745.25024	1111.876	0.30238295	0.5404296	-0.28653526	-1.4443839	947687	truB	tRNA pseudouridine 5S synthase [b3166]
A_07_P000559	3931.028	4365.9536	701.27637	1034.5446	0.42489982	0.40662313	-0.29141617	-1.4655228	947685	rbfA	ribosome-binding factor A [b3167]
A_07_P000561	14810.58	18447.135	1766.4875	3786.1743	0.75338674	0.90048933	-0.5437496	-1.1789412	947684	infB	protein chain initiation factor IF-2 [b3168]
A_07_P000566	5701.8594	7325.54	1351.4482	1847.2518	0.19975185	0.3915882	-0.106639385	-1.3908131	947682	nusA	transcription pausing; L factor [b3169]
A_07_P000572	30601.783	39331.203	10351.882	10236.596	-0.04393506	0.148458	0.16287804	-1.5883262	947680	yhbC	orf, hypothetical protein [b3170]
A_07_P000576	1151.6792	3147.9092	265.33426	1749.4203	-0.31498408	0.96600485	-0.6623038	0.32364273	947590	argG	argininosuccinate synthetase [b3172]
A_07_P000583	76.18614	137.56567	55.2187	130.82553	-0.64672446	0.03612888	0.6594393	0.16880739	947711	yhbX	putative alkaline phosphatase I [b3173]
A_07_P000590	9907.965	7057.0947	6660.7964	3543.8164	0.21659565	-0.44258475	1.4142368	-1.2312009	947720	secG	protein export - membrane protein [b3175]
A_07_P000591	1499.6552	1914.6165	563.58215	909.0787	-0.045692205	0.13706613	0.31291056	-0.732358	947692	glmM	similar to phosphoglucomutases and phosphomannomutases [b3176]
A_07_P000598	1127.9581	1455.8467	962.38477	705.6946	-0.041350126	0.15712762	1.5001571	-0.6824603	947691	folP	7,8-dihydropteroate synthase [b3177]
A_07_P000601	3752.4526	4469.0913	1360.3628	2364.0542	-0.0036535263	0.07882905	0.30304003	-0.6347358	947690	hflB	degrades sigma32, integral membrane peptidase, cell division protein [b3178]
A_07_P000609	6999.6426	7143.002	2331.7737	6350.293	0.06187892	-0.0785377	0.24656081	-0.04309106	947689	rrmJ	cell division protein [b3179]
A_07_P000614	5884.811	8201.1455	1141.8715	3548.6382	0.27228022	0.581444	-0.3227799	-0.4219613	947688	yhbY	orf, hypothetical protein [b3180]
A_07_P000616	3475.5583	4131.045	1040.2913	1543.1549	0.03336072	0.11295557	0.06363845	-1.1025136	947696	greA	transcription elongation factor: cleaves 3 nucleotide of paused mRNA [b3181]
A_07_P000621	491.8507	500.26144	238.37506	346.4947	0.07363963	-0.0715642	0.7991884	-0.39625835	947693	dacB	D-alanyl-D-alanine carboxypeptidase, fraction B; penicillin-binding protein 4 [b3182]
A_07_P000626	18.377459	22.9608	5.251046	80.36891	-0.37414634	-0.22257733	-0.41087115	1.7900424	946664	yeiC	putative kinase [b2166]
A_07_P000634	644.53	1373.3384	271.3143	373.55664	-0.19983244	0.7218678	0.32242	-0.9512651	946672	fruA	PTS system, fructose-specific transport protein [b2167]
A_07_P000638	447.4646	864.7023	200.69029	214.01776	-0.21821713	0.5625465	0.39551604	-1.2467722	946676	fruK	fructose-1-phosphate kinase [b2168]
A_07_P000645	236.00745	421.88388	114.86966	76.26039	-0.19355929	0.47478843	0.53814197	-1.7878976	946677	fruB	PTS system, fructose-specific IIA/fpr component [b2169]
A_07_P000646	72.64433	96.16249	25.233835	66.67167	-0.15960622	0.07535124	0.08543885	-0.24789453	946673	setB	putative transport [b2170]
A_07_P000651	1069.05	936.06647	503.60526	318.03708	0.22820592	-0.13310766	0.91277647	-1.4853687	946674	yeiP	putative elongation factor [b2171]
A_07_P000660	70.63291	157.19063	39.508926	735.6938	-0.9361136	0.048322797	-0.0037403107	2.480067	946688	yeiQ	putative oxidoreductase [b2172]
A_07_P000661	187.0915	211.16844	61.255222	184.69002	-0.018783927	-0.013799906	0.14091206	-0.0019338131	946701	yeiR	orf, hypothetical protein [b2173]
A_07_P000669	1025.8937	1557.0411	185.00851	816.4143	0.091855764	0.5241153	-0.6088263	-0.2021637	946693	lpxT	orf, hypothetical protein [b2174]
A_07_P000674	485.3341	387.6759	171.76044	694.8664	-0.08421373	-0.5780065	0.18774211	0.46903205	946686	spr	putative lipoprotein [b2175]
A_07_P000680	99.61074	149.85483	50.94927	132.14531	-0.4725293	-0.05300343	0.3307662	-0.029288888	946695	rtn	orf, hypothetical protein [b2176]
A_07_P000681	237.68753	247.72313	96.81959	369.25507	-0.2857828	-0.39578652	0.18905759	0.38525748	946675	yejA	orf, hypothetical protein [b2177]
A_07_P000687	76.16125	86.944435	27.49153	121.097824	-0.24371004	-0.22233975	0.056755662	0.46082222	946679	yejB	putative transport system permease protein [b2178]
A_07_P000694	226.28313	290.2316	47.150627	288.5753	-0.1420188	0.04739046	-0.63426363	0.24428809	946683	yejE	putative transport system permease protein [b2179]
A_07_P000699	126.72037	223.02824	65.744026	159.66148	-0.543391	0.102520704	0.28042793	-0.17453456	946689	yejF	putative ATP-binding component of a transport system [b2180]
A_07_P000703	478.68478	551.7231	494.5469	548.4439	-0.23584485	-0.2006433	1.581722	-0.0040893555	945319	yejG	orf, hypothetical protein [b2181]
A_07_P000706	409.79257	567.7848	183.60075	386.11707	-0.08532572	0.21545815	0.52688813	-0.13569307	944808	bcr	bicyclomycin resistance protein; transmembrane protein [b2182]
A_07_P000715	941.1897	1388.5234	324.73962	1031.6462	-0.20332766	0.1880002	0.032004833	-0.03544855	945378	rsuA	16S pseudouridylate 516 synthase [b2183]
A_07_P000717	206.77792	234.68492	67.035576	164.43019	0.026974916	0.039951682	0.17242718	-0.26814365	945529	yejH	putative ATP-dependent helicase [b2184]
A_07_P000722	28803.342	29025.996	6588.245	7978.0825	0.3358972	0.17733955	-0.02183795	-1.4807367	945618	rplY	50S ribosomal subunit protein L25 [b2185]
A_07_P000729	2537.256	2582.903	352.6563	1072.7517	0.60134745	0.45740485	-0.4750526	-0.6051178	946690	yejK	orf, hypothetical protein [b2186]
A_07_P000733	374.6492	429.9224	122.75315	349.88315	-0.056493044	-0.027622938	0.10426259	-0.119671464	946694	yejL	orf, hypothetical protein [b2187]
A_07_P000736	269.04984	201.55727	96.86414	115.288124	0.31836283	-0.26798677	0.6150603	-0.8687779	946685	yejM	putative sulfatase [b2188]
A_07_P000743	13.777368	14.850915	7.744246	17.6272	-0.40289867	-0.4643135	0.53653336	-0.011907101	946867	yejO	putative ATP-binding component of a transport system [b2190]
A_07_P000748	13.85766	11.425018	7.211153	15.356914	-0.119443774	-0.5675974	0.7087098	0.06424892	949121	insH	IS5 transposase [b2192]
A_07_P000752	570.13995	529.15	211.5068	471.40744	0.0850327	-0.19227314	0.42495596	-0.15382099	949081	narP	nitrate/nitrite response regulator [b2193]
A_07_P000756	176.82692	189.37788	39.93147	112.84944	0.14963186	0.07889557	-0.2265724	-0.46281862	946623	ccmH	possible subunit of heme lyase [b2194]
A_07_P000765	177.40607	181.78757	52.45339	108.92317	0.15028262	0.015814543	0.16287065	-0.5179734	949073	ccmG	disulfide oxidoreductase [b2195]
A_07_P000767	127.74718	116.06471	26.260809	114.70644	0.238199	-0.069829464	-0.27357423	0.118341684	948783	ccmF	cytochrome c-type biogenesis protein [b2196]
A_07_P000772	194.82329	126.38445	67.83275	206.13159	0.0062913895	-0.7877219	0.25471473	0.123179674	946697	ccmE	cytochrome c biogenesis, possible subunit of a heme lyase [b2197]
A_07_P000776	102.136856	65.58043	31.1207	161.2131	-0.053103924	-0.86193645	0.0028746128	0.6408498	946709	ccmD	heme exporter protein C [b2198]
A_07_P000784	322.48663	247.6253	118.715706	424.16064	-0.071331024	-0.62207735	0.25747597	0.3595283	946703	ccmC	heme exporter protein C [b2199]
A_07_P000787	99.412544	81.52878	40.694843	119.814545	-0.102190256	-0.5579747	0.37976336	0.20260179	946692	ccmB	heme exporter protein B, cytochrome c-type biogenesis protein [b2200]
A_07_P000792	419.09152	293.32162	146.43872	267.4251	0.17238045	-0.5120683	0.4259472	-0.44026196	946714	ccmA	ATP binding protein of heme exporter A [b2201]
A_07_P000799	539.18066	416.18695	172.10117	389.7755	0.13810372	-0.40509987	0.261127	-0.2945335	946706	napC	cytochrome c-type protein [b2202]
A_07_P000804	89.730316	71.00126	70.103355	92.33848	-0.06405914	-0.5714767	1.350364	0.012765408	946698	napB	cytochrome c-type protein [b2203]
A_07_P000808	67.70809	50.71969	64.28727	54.917202	0.040466905	-0.5459815	1.736207	-0.22611511	945984	napH	ferredoxin-type protein: electron transfer [b2204]
A_07_P000815	79.26656	54.909218	80.35597	85.03763	-0.14664114	-0.84597147	1.6435871	-0.009763598	945544	napG	ferredoxin-type protein: electron transfer [b2205]
A_07_P000816	57.05913	46.763355	75.695366	69.85591	-0.050778627	-0.50752413	2.1275043	0.27663434	947093	napA	probable nitrate reductase 3 [b2206]
A_07_P000822	58.95032	39.33428	160.43105	57.762386	0.10261536	-0.6507633	3.3175325	0.10873413	945187	napD	orf, hypothetical protein [b2207]
A_07_P000827	86.07923	103.740166	158.08804	129.96788	-0.36255002	-0.2629795	2.284976	0.26735604	946813	napF	ferredoxin-type protein: electron transfer [b2208]
A_07_P000831	948.6847	1657.265	712.172	1169.49	-0.5045216	0.13061619	0.8523109	-0.16715455	946700	eco	ecotin, a serine protease inhibitor [b2209]
A_07_P000836	276.74316	703.8893	230.9677	337.24353	-0.7136663	0.46346807	0.79601216	-0.392936	946702	mqo	orf, hypothetical protein [b2210]
A_07_P000842	642.1965	646.4305	569.87585	599.5909	-0.3662622	-0.52644897	1.2319059	-0.42981124	946705	yojI	putative ATP-binding component of a transport system [b2211]
A_07_P000848	189.4363	273.55948	41.86989	947.4394	-0.14987874	0.21059692	-0.55707073	2.20793	946708	alkB	DNA repair system specific for alkylated DNA [b2212]
A_07_P000854	56.036438	58.014275	22.424417	93.22922	-0.23198736	-0.35161114	0.21725327	0.5379175	946710	ada	O6-methylguanine-DNA methyltransferase; transcription activator/repressor [b2213]
A_07_P000856	23.965153	20.793598	7.9496846	17.286388	0.20239913	-0.17206597	0.38096607	-0.23341405	946711	apbE	orf, hypothetical protein [b2214]
A_07_P000863	56412.22	61950.61	3397.835	24090.81	0.68825555	0.65369916	-1.5945292	-0.50378203	946716	ompC	outer membrane protein 1b [b2215]
A_07_P000870	567.13135	542.6422	146.8659	259.6911	0.19703174	-0.036314964	0.018384337	-0.8943659	946717	rcsD	putative 2-component sensor protein [b2216]
A_07_P000871	555.5592	523.65906	202.16635	359.86145	0.112828255	-0.14215088	0.42496586	-0.4781835	947441	rcsB	positive response regulator for colanic capsule biosynthesis, [b2217]
A_07_P000879	248.63322	406.7295	68.93505	194.30838	0.06585443	0.6062386	-0.014320135	-0.2543286	948993	rcsC	sensor for ctr capsule biosynthesis, probable histidine kinase acting on RcsB [b2218]
A_07_P000883	93.481094	160.3645	17.112173	478.57278	-0.29885733	0.31008482	-0.9779738	2.0926225	949011	atoS	sensor protein AtoS for response regulator AtoC [b2219]
A_07_P000888	65.38927	75.48378	15.1601	385.4864	-0.10596049	-0.06851351	-0.44419956	2.489082	947444	atoC	response regulator of ato, ornithine decarboxylase antizyme [b2220]
A_07_P000894	40.673317	39.05921	20.522758	80.84559	-0.21793032	-0.44601703	0.5657472	0.8086438	947525	atoD	acetyl-CoA:acetoacetyl-CoA transferase alpha subunit [b2221]
A_07_P000897	29.85765	25.821472	10.946735	91.29075	-0.21656239	-0.5957581	0.10637319	1.4312941	946719	atoA	acetyl-CoA:acetoacetyl-CoA transferase beta subunit [b2222]
A_07_P000905	72.06279	92.424675	21.609507	161.23953	-0.2745483	-0.08519113	-0.24160153	0.9228189	946721	atoE	short chain fatty acid transporter [b2223]
A_07_P000906	28.179527	16.538261	11.956695	34.045116	-0.11741328	-1.0559194	0.41629326	0.19087541	946727	atoB	acetyl-CoA acetyltransferase [b2224]
A_07_P000913	15.715124	9.350659	7.989446	25.187872	-0.27486694	-1.193547	0.51968217	0.44119692	946728	yfaP	orf, hypothetical protein [b2225]
A_07_P000918	90.9808	103.1288	43.706364	116.09733	-0.17230189	-0.16115487	0.54051435	0.21488678	946730	yfaQ	orf, hypothetical protein [b2226]
A_07_P000922	9.800104	8.941975	4.7912545	11.557584	-0.2235887	-0.52545846	0.51455307	0.049870133			orf, hypothetical protein [b2227]
A_07_P000926	38.529877	36.78647	17.149185	45.952255	-0.1757828	-0.4122516	0.42691463	0.11386335			putative membrane protein [b2228]
A_07_P000934	27.965576	34.93487	10.20523	55.86551	-0.37675047	-0.22540057	-0.060557663	0.65704405	946622	yfaT	orf, hypothetical protein [b2229]
A_07_P000938	38.710896	35.167618	12.164734	65.73881	0.1903466	-0.11781168	0.29084724	0.9898404	946618	yfaA	orf, hypothetical protein [b2230]
A_07_P000942	3177.769	3514.2456	756.41943	1317.7649	0.20550346	0.18103695	-0.094717026	-1.0289302	946614	gyrA	DNA gyrase, subunit A, type II topoisomerase [b2231]
A_07_P000949	415.9966	448.765	126.5514	310.361	0.078121185	0.017843723	0.1318084	-0.30901504	946607	ubiG	3-demethylubiquinone-9 3-methyltransferase and 2-octaprenyl-6-hydroxy phenol methylase [b2232]
A_07_P000955	140.4102	113.36751	47.967403	140.23753	-0.06318414	-0.5414907	0.15783012	-0.02947104	946595	yfaL	putative ATP-binding component of a transport system [b2233]
A_07_P000956	3955.7634	3929.1628	296.01962	1609.628	0.70324993	0.523849	-1.2664067	-0.5584905	946612	nrdA	ribonucleoside diphosphate reductase 1, alpha subunit, B1 [b2234]
A_07_P000962	2887.619	3469.636	286.7369	1214.1776	0.61480093	0.71003866	-0.94674504	-0.5996108	946732	nrdB	ribonucleoside-diphosphate reductase 1, beta subunit, B2 [b2235]
A_07_P000966	1179.1077	1367.6238	195.96243	437.32846	0.4497888	0.49409747	-0.36872268	-0.9456296	946729	yfaE	orf, hypothetical protein [b2236]
A_07_P000971	336.20227	453.3241	95.593094	314.50204	0.01658535	0.27813292	-0.027229905	-0.044185877	946731	inaA	pH-inducible protein involved in stress response [b2237]
A_07_P000977	9.935654	6.5249796	6.414704	12.92255	-0.23205411	-1.0083619	0.9072494	0.18263829	946718	yfaH	orf, hypothetical protein [b2238]
A_07_P000982	990.1346	747.44965	77.55684	604.6258	0.83379984	0.25848556	-1.0699626	0.1577065	946725	glpQ	glycerophosphodiester phosphodiesterase, periplasmic [b2239]
A_07_P000990	805.89044	680.0627	29.871675	471.9188	0.7562959	0.34171438	-2.2269015	0.01973939	946704	glpT	sn-glycerol-3-phosphate permease [b2240]
A_07_P000991	132.09116	143.70837	20.624254	33.743576	0.82239676	0.7743406	-0.08618778	-1.1109638	946713	glpA	sn-glycerol-3-phosphate dehydrogenase [b2241]
A_07_P000998	49.270298	36.22812	19.937016	37.09694	0.064306974	-0.5489676	0.52957344	-0.30962288	946733	glpB	sn-glycerol-3-phosphate dehydrogenase [b2242]
A_07_P001001	221.35767	121.26256	21.012398	99.29524	1.0797155	0.041803956	-0.5468159	-0.041378856	946735	glpC	sn-glycerol-3-phosphate dehydrogenase [b2243]
A_07_P001008	26.2941	30.003794	10.176095	50.298447	-0.3240794	-0.3033396	0.07690114	0.64718366	946737	yfaD	orf, hypothetical protein [b2244]
A_07_P001012	52.777493	55.672756	25.784168	66.43913	-0.22069561	-0.31331325	0.5164027	0.14690304	948054	yfaU	orf, hypothetical protein [b2245]
A_07_P001019	21.470472	26.387262	10.135784	35.387135	-0.36909044	-0.24126875	0.31854886	0.38726866	945796	yfaV	putative transport protein [b2246]
A_07_P001021	57.512753	51.422882	20.927023	142.10693	-0.20062041	-0.5317576	0.111400485	1.1398913	945881	yfaW	putative racemase [b2247]
A_07_P001027	45.97533	43.905777	17.908716	101.31715	-0.22033691	-0.45645237	0.19000053	0.9550973	944752	yfaX	putative regulator [b2248]
A_07_P001034	373.5176	603.69684	117.50683	269.9966	-0.022727251	0.5002537	0.079375625	-0.4554752	945478	yfaY	orf, hypothetical protein [b2249]
A_07_P001040	175.33208	235.23715	252.8807	170.66054	-0.21995771	0.03440261	2.0789452	-0.22342944	946739	yfaZ	orf, hypothetical protein [b2250]
A_07_P001045	305.77118	360.11963	72.98796	389.35834	-0.03134632	0.035012126	-0.32753265	0.35278833	946740	nudI	orf, hypothetical protein [b2251]
A_07_P001047	38.11928	221.24458	15.75587	68.61737	-0.7687181	1.598665	-0.27281415	0.11482239	944945	ais	protein induced by aluminum [b2252]
A_07_P001051	246.50542	822.0072	45.492714	851.7168	-0.70406103	0.8638041	-1.3714373	1.1201806	947375	arnB	putative enzyme [b2253]
A_07_P001060	350.18347	859.97894	49.12256	711.69946	-0.55143976	0.57508373	-1.6145576	0.5072057	945275	arnC	putative sugar transferase [b2254]
A_07_P001065	143.15399	269.58624	23.687912	145.3516	0.023967385	0.76748	-0.80084217	0.081434846	947683	arnA	putative transformylase [b2255]
A_07_P001070	59.47224	82.632614	23.03708	83.57095	-0.2893008	0.015527725	0.11297572	0.23697257	945334	arnD	orf, hypothetical protein [b2256]
A_07_P001072	145.40569	178.69444	26.789507	226.81529	-0.13029742	-0.0025532246	-0.80010617	0.54662514	947297	arnT	orf, hypothetical protein [b2257]
A_07_P001077	18.286839	23.365755	8.23687	40.792732	-0.42605197	-0.24212813	0.19384605	0.76694274	945344	arnF	putative transport/receptor protein [b2258]
A_07_P001081	108.89776	203.62457	48.114693	254.83307	-0.6705246	0.06274605	-0.07841444	0.5915414	945130	pmrD	polymyxin resistance protein B [b2259]
A_07_P001090	373.5937	467.10876	69.09	151.24036	0.21897817	0.37160158	-0.44540715	-1.0501599	946741	menE	o-succinylbenzoate-CoA ligase [b2260]
A_07_P001094	546.6797	718.91974	90.8827	253.51413	0.4483168	0.67378616	-0.36976588	-0.624825	946734	menC	o-succinylbenzoyl-CoA synthase; conversion of chorismate to 2-o-succinylbenzoyl-CoA [b2261]
A_07_P001100	1388.5262	1273.4357	134.38205	529.3946	0.8461609	0.5516658	-0.7524457	-0.50949025	946747	menB	dihydroxynaphtoic acid synthetase [b2262]
A_07_P001104	524.81305	467.8931	122.89913	270.43655	0.36092067	0.02562952	0.03712654	-0.56010485	946736	yfbB	putative enzyme [b2263]
A_07_P001109	260.5612	296.77393	52.593536	175.89626	0.26433194	0.28240705	-0.27379763	-0.26707733	946720	menD	2-oxoglutarate decarboxylase; SHCHC synthase [b2264]
A_07_P001112	543.4273	461.5468	164.85748	531.392	0.03347659	-0.37179923	0.083144546	0.03665495	946712	menF	isochorismate hydroxymutase 2, menaquinone biosynthesis [b2265]
A_07_P001117	1627.317	1393.7771	75.08637	1588.1705	0.2811339	-0.11202741	-2.3861303	0.2814927	946751	elaB	orf, hypothetical protein [b2266]
A_07_P001124	5.163905	4.312069	2.8656278	3.1691833	0.052484274	-0.37726426	0.9734086	-0.616379	946750	elaA	orf, hypothetical protein [b2267]
A_07_P001130	106.716606	104.86043	29.653648	58.78696	0.13962722	-0.055353403	0.06265974	-0.6851016	946760	rbn	orf, hypothetical protein [b2268]
A_07_P001133	147.41614	146.61118	108.21797	140.96056	-0.10169399	-0.27925956	1.2228872	-0.1308093	946742	elaD	putative sulfatase / phosphatase [b2269]
A_07_P001140	180.91107	165.64925	87.58037	207.8654	-0.031598568	-0.32841408	0.69233584	0.20425797	946743	yfbK	orf, hypothetical protein [b2270]
A_07_P001142	15.872108	10.2893915	7.672429	29.860996	-0.09711671	-0.89211917	0.6246804	0.8501395	945832	yfbL	putative aminopeptidase [b2271]
A_07_P001148	22.018652	38.624702	10.928743	50.70873	-0.6804526	-0.039321184	0.079484284	0.5585431	946745	yfbM	orf, hypothetical protein [b2272]
A_07_P001151	9.872011	6.6711493	6.722345	9.699513	0.10792458	-0.6271504	1.3240803	0.11798096	946748	yfbN	orf, hypothetical protein [b2273]
A_07_P001158	28.18765	34.115948	13.636765	19.212042	0.12355876	0.22927523	0.84653234	-0.39400566	946752	yfbO	orf, hypothetical protein [b2274]
A_07_P001161	8.182786	5.341788	5.636948	5.5978055	0.20556676	-0.5793687	1.4384246	-0.3066758	946754	yfbP	orf, hypothetical protein [b2275]
A_07_P001166	1799.2643	2278.6553	166.6699	722.5798	0.58773255	0.75884223	-1.0740733	-0.69295716	945136	nuoN	NADH dehydrogenase I chain N [b2276]
A_07_P001174	4738.2993	5524.1826	233.89738	1487.7443	0.8028116	0.8545377	-1.7670747	-0.83294296	947731	nuoM	NADH dehydrogenase I chain M [b2277]
A_07_P001178	4875.0283	5796.1963	461.22568	1429.6925	0.74974465	0.8297751	-0.8815856	-0.98447275	945540	nuoL	NADH dehydrogenase I chain L [b2278]
A_07_P001181	2606.3904	3446.669	220.49821	735.3428	0.8483243	1.0818071	-0.9443544	-0.9417522	947580	nuoK	NADH dehydrogenase I chain K [b2279]
A_07_P001189	1487.2625	2595.26	1046.1481	976.3815	-0.31681848	0.3167348	0.94614506	-0.8884735	946951	ymcE	suppresses fabA and ts growth mutation [b0991]
A_07_P001194	95.29568	99.76744	39.398098	110.0384	-0.071960926	-0.17546892	0.42429006	0.17105174	946295	yccM	orf, hypothetical protein [b0992]
A_07_P001197	460.41354	497.2957	257.188	346.08148	0.037719727	-0.020772934	0.96814895	-0.3386098	945595	torS	sensor protein torS [b0993]
A_07_P001201	109.70721	68.56004	22.973295	92.372604	0.30333924	-0.54454565	-0.18175393	0.09070575	946289	torT	part of regulation of tor operon, periplasmic [b0994]
A_07_P001209	49.41937	43.301815	19.241915	61.889507	-0.15173304	-0.512048	0.25797844	0.20837379	946182	torR	response transcriptional regulator for torA [b0995]
A_07_P001215	48955.152	2626.6682	1560.7798	66.41009	3.7413423	-0.6484785	0.540756	-5.749012	946252	torC	trimethylamine N-oxide reductase, cytochrome c-type subunit [b0996]
A_07_P001220	3032.2512	227.96753	165.32523	45.96219	3.0036516	-0.89950395	0.57717633	-3.0046585	946267	torA	trimethylamine N-oxide reductase subunit [b0997]
A_07_P001224	13953.036	855.4227	435.40103	103.657326	3.3540697	-0.8433938	0.12251449	-3.6830556	945625	torD	part of trimethylamine-N-oxide oxidoreductase [b0998]
A_07_P001226	1631.4067	1281.4154	124.76718	2606.1594	0.2610588	-0.2569859	-1.6772115	0.9723551	945597	cbpM	orf, hypothetical protein [b0999]
A_07_P001235	1203.9427	1040.2583	120.24928	2028.8848	0.16533375	-0.21515799	-1.387798	0.9537406	947572	cbpA	curved DNA-binding protein; functions closely related to DnaJ [b1000]
A_07_P001240	109.77815	156.60486	56.72733	98.41961	-0.34063828	0.0022330284	0.47742188	-0.4627236	947468	yccE	orf, hypothetical protein [b1001]
A_07_P001241	541.478	567.0781	13.726166	1592.786	0.16628885	0.06326747	-3.365078	1.7583547	945773	agp	periplasmic glucose-1-phosphatase [b1002]
A_07_P001246	3314.4207	1602.8231	53.03503	10088.823	0.5206609	-0.69714737	-3.6744719	2.162078	948930	yccJ	orf, hypothetical protein [b1003]
A_07_P001254	12599.713	6055.233	149.74828	29899.686	0.55807376	-0.6687288	-4.0660987	1.8403015	947263	wrbA	trp repressor binding protein; affects association of trp repressor and operator [b1004]
A_07_P001260	338.20862	97.9818	30.594223	171.9543	1.3372045	-0.61978936	-0.3588419	0.39680505			orf, hypothetical protein [b1005]
A_07_P001261	19.932074	11.716193	8.521263	27.39578	-0.20381582	-1.1400698	0.34076697	0.29053462	946589	rutG	putative transport protein [b1006]
A_07_P001269	31.086887	32.96788	15.550528	48.601345	-0.43112087	-0.5160322	0.34007204	0.24905765	946594	rutF	orf, hypothetical protein [b1007]
A_07_P001274	9.622665	8.276377	4.3534393	18.099888	-0.30991924	-0.6970227	0.31633556	0.63704145	946591	rutE	putative enzyme [b1008]
A_07_P001278	34.92058	37.417477	10.93017	77.070045	-0.03413844	-0.10416973	0.060635686	1.1434425	946586	rutD	putative acetyltransferase [b1009]
A_07_P001283	25.75166	22.055244	6.9202366	55.99717	0.09862721	-0.29458237	-0.026609302	1.2548041	945599	rutC	orf, hypothetical protein [b1010]
A_07_P001287	1546.3062	2799.65	449.0089	1365.8945	0.034635067	0.7213893	0.021159649	-0.10885787	945699	rutB	putative synthetase [b1011]
A_07_P001291	18.692383	34.37618	9.716862	40.308643	-0.7293179	-0.020025492	0.0973292	0.41480863	945643	rutA	orf, hypothetical protein [b1012]
A_07_P001300	100.463425	124.06778	82.87506	138.02211	-0.28105628	-0.1462642	1.2118189	0.21266067	945075	rutR	putative tet operon regulator [b1013]
A_07_P001304	147.80214	427.34625	63.30419	512.7248	-0.9603052	0.40176725	-0.41306353	0.86970115	945600	putA	proline dehydrogenase, P5C dehydrogenase [b1014]
A_07_P001306	1041.2434	2358.131	720.7889	2206.6604	-1.0199676	-0.010296822	0.21990967	0.0990777	945602	putP	major sodium/proline symporter [b1015]
A_07_P001312	333.70514	854.1277	63.659454	607.5352	-0.5542667	0.63194513	-1.1738575	0.34561563			putative cytochrome [b1017]
A_07_P001316	40.65563	93.36496	11.757485	60.522022	-0.38314664	0.6466129	-0.40248674	0.22634637	945603	efeO	orf, hypothetical protein [b1018]
A_07_P001323	2118.662	5879.659	217.82129	2492.218	-0.13878155	1.1641314	-1.6501827	0.13098264	946500	efeB	orf, hypothetical protein [b1019]
A_07_P001326	687.6967	527.2736	528.61725	3043.4607	-0.747741	-1.3006282	0.643245	1.433615	948010	phoH	PhoB-dependent, ATP-binding pho regulon component; may be helicase; induced by P starvation [b1020]
A_07_P001332	538.4292	743.1924	333.22546	346.84048	-0.1541512	0.14116144	0.92412615	-0.7531475	947503	pgaD	orf, hypothetical protein [b1021]
A_07_P001337	115.39437	223.14961	73.8402	96.63844	-0.52512276	0.2566495	0.60131836	-0.7455381	945606	pgaC	orf, hypothetical protein [b1022]
A_07_P001344	159.94823	312.6144	98.26145	253.9931	-0.7083	0.08881259	0.35932803	-0.0056273937	945604	pgaB	orf, hypothetical protein [b1023]
A_07_P001349	179.7035	252.86465	121.67841	400.6896	-0.5827085	-0.25962746	0.6252825	0.6096463	945596	pgaA	putative outer membrane protein [b1024]
A_07_P001352	235.81844	533.8898	96.59367	237.01866	-0.34946144	0.65973806	0.13339818	-0.30664897	945593	ycdT	orf, hypothetical protein [b1025]
A_07_P001359	179.93286	146.3302	132.76776	164.71866	-0.3231691	-0.79106724	1.0088123	-0.41513586	945589	ymdE	orf, hypothetical protein [b1028]
A_07_P001361	1.8525889	2.4568253	1.4070152	4.1088495	-0.54370534	-0.30611932	0.8299252	0.6409745	945592	ycdU	orf, hypothetical protein [b1029]
A_07_P001367	31.96968	43.33274	17.180319	52.148956	-0.49846256	-0.22937584	0.3761255	0.24295986			orf, hypothetical protein [b1030]
A_07_P001374	19.333952	21.781849	10.426223	27.528917	-0.45970237	-0.45737875	0.41991323	0.08559716			putative ribosomal protein [b1031]
A_07_P001376	292.11014	414.21686	73.14721	230.67062	0.14324224	0.47745013	-0.08385992	-0.16194737	946431	ghrA	putative dehydrogenase [b1033]
A_07_P001382	641.3688	892.12244	153.075	424.19794	0.1194942	0.42591572	-0.17688537	-0.44143462	948477	ycdX	orf, hypothetical protein [b1034]
A_07_P001389	1076.6633	1324.3511	212.97249	622.64197	0.33367229	0.46272445	-0.23361993	-0.42093182	945609	ycdY	putative oxidoreductase component [b1035]
A_07_P001391	704.6211	789.014	210.74382	386.53564	0.05758214	0.05111909	0.086759806	-0.7731762	945617	ycdZ	orf, hypothetical protein [b1036]
A_07_P001396	161.37457	203.96318	52.944485	168.2005	-0.09088373	0.07734513	0.071790695	0.0043725967	945619	csgG	curli production assembly/transport component, 2nd curli operon [b1037]
A_07_P001401	178.4837	245.92772	33.43058	296.38223	-0.10896802	0.18380797	-0.75498426	0.6581874	945622	csgF	curli production assembly/transport component, 2nd curli operon [b1038]
A_07_P001409	135.27786	234.0669	24.295002	331.63297	-0.34726202	0.27406633	-1.0539213	0.9818871	945711	csgE	curli production assembly/transport component, 2nd curli operon [b1039]
A_07_P001412	96.73297	108.18861	26.517525	178.644	-0.09629679	-0.10449433	-0.19282365	0.8241986	949119	csgD	putative 2-component transcriptional regulator for 2nd curli operon [b1040]
A_07_P001417	71.815155	58.19318	23.555826	56.876247	0.3082813	-0.16482306	0.47061223	0.007307291	947391	csgB	minor curlin subunit precursor, similar ro CsgA [b1041]
A_07_P001421	5.6886954	4.6795387	4.0271974	5.666691	-0.28172052	-0.73311865	0.99049294	-0.25182378	949055	csgA	curlin major subunit, coiled surface structures; cryptic [b1042]
A_07_P001429	19.461233	18.843977	12.796104	32.755768	-0.16605234	-0.38221776	0.99958503	0.6205822	945623	csgC	putative curli production protein [b1043]
A_07_P001431	26.537823	26.616335	14.673115	50.112614	-0.42477894	-0.59018314	0.4908818	0.5278332	949012	ymdA	orf, hypothetical protein [b1044]
A_07_P001438	616.2183	900.783	93.10026	735.52216	-0.13657737	0.24149394	-1.0926273	0.15423656	946987	ymdB	putative polyprotein [b1045]
A_07_P001444	41.931614	55.55431	28.973112	87.471596	-0.7083839	-0.47218943	0.5288278	0.38788056	947321	ymdC	putative synthase [b1046]
A_07_P001448	94.37163	103.48144	62.269733	89.34364	-0.09083462	-0.12755406	1.079879	-0.13433433	946944	mdoC	orf, hypothetical protein [b1047]
A_07_P001451	2401.3826	2311.8901	378.71432	1358.8628	0.51793265	0.29347372	-0.3762157	-0.26804543	945005	mdoG	periplasmic glucans biosynthesis protein [b1048]
A_07_P001457	1023.9052	1342.3516	197.74164	355.92596	0.26156592	0.48258066	-0.34029257	-1.227379	945624	mdoH	membrane glycosyltransferase; synthesis of membrane-derived oligosaccharide [b1049]
A_07_P001463	362.87296	371.1867	106.435646	591.68085	-0.092436075	-0.22942233	-0.091383934	0.64840627	945613	yceK	orf, hypothetical protein [b1050]
A_07_P001467	1351.1365	655.6443	162.05928	3071.3103	0.6902394	-0.5226159	-0.59880567	1.9104075	945612	msyB	acidic protein suppresses mutants lacking function of protein export [b1051]
A_07_P001472	107.66662	117.660065	33.794983	226.44563	-0.050495744	-0.09210825	0.04834962	1.0575856	945627	mdtG	putative transport protein [b1053]
A_07_P001480	605.38245	592.3653	367.80606	400.1917	0.107958555	-0.093066454	1.1595926	-0.45370817	946216	lpxL	heat shock protein [b1054]
A_07_P001482	304.91534	290.71375	256.1261	424.94168	-0.24871254	-0.48718822	1.2702687	0.2656319	945601	yceA	orf, hypothetical protein [b1055]
A_07_P001488	266.79034	464.9425	188.94217	270.00162	-0.31780863	0.31387138	0.95496607	-0.2650578	946145	yceI	orf, hypothetical protein [b1056]
A_07_P001495	126.0238	246.04991	157.21854	204.67915	-0.764364	0.031225562	1.3252469	-0.029207706	945628	yceJ	putative cytochrome [b1057]
A_07_P001500	922.14465	1022.4105	217.78098	773.5738	0.12711549	0.106359005	-0.18446422	-0.090850115	944983	solA	sarcosine oxidase-like protein [b1059]
A_07_P001504	2481.0996	2220.1724	2362.5217	6139.134	-0.7091036	-1.0390775	0.99078035	0.63344	946104	bssS	orf, hypothetical protein [b1060]
A_07_P001507	438.91498	399.10196	743.58356	216.58408	0.25525188	-0.051599264	2.7863402	-0.7282747	945022	dinI	damage-inducible protein I [b1061]
A_07_P001513	661.48914	684.5875	116.361626	570.4238	0.3193555	0.1992073	-0.41721117	0.14116049	945787	pyrC	dihydro-orotase [b1062]
A_07_P001517	1003.6455	847.24194	141.43958	1251.7743	0.11596441	-0.29810596	-0.9404925	0.47017646	947377	yceB	orf, hypothetical protein [b1063]
A_07_P001521	1957.6174	1279.8494	87.944405	2534.321	0.22713423	-0.5556569	-2.4786935	0.63512325	946926	grxB	glutaredoxin 2 [b1064]
A_07_P001526	685.01306	1389.1688	213.75867	1346.6914	-0.6092031	0.24114895	-0.5188165	0.4015007	946920	mdtH	orf, hypothetical protein [b1065]
A_07_P001534	644.8607	754.3268	139.86429	756.38947	0.0033113956	0.059846878	-0.431113	0.26894093	946910	rimJ	acetylation of N-terminal alanine of 30S ribosomal subunit protein S5 [b1066]
A_07_P001540	191.78397	283.0011	56.114243	268.89124	-0.22287655	0.16878211	-0.22538388	0.30015254	945633	yceH	orf, hypothetical protein [b1067]
A_07_P001544	322.14786	412.32724	114.66175	583.12494	-0.17046332	0.015937567	0.10973346	0.721107	945204	yceM	putative virulence factor [b1068]
A_07_P001549	95.89699	96.49705	62.861336	92.70265	-0.09458578	-0.25525272	1.0666372	-0.1079725	945487	yceN	putative virulence factor [b1069]
A_07_P001551	19.874874	21.850805	8.140029	24.070032	-0.13903427	-0.17195964	0.34366167	0.1727463	945634	flgN	protein of flagellar biosynthesis [b1070]
A_07_P001559	133.71759	280.9268	35.495514	216.93578	-0.4508791	0.45045936	-0.59382474	0.28268766	946684	flgM	anti-FliA [b1071]
A_07_P001564	124.69722	134.28664	83.62392	123.26005	-0.24529946	-0.308079	0.948794	-0.22653532	946300	flgA	flagellar biosynthesis; assembly of basal-body periplasmic P ring [b1072]
A_07_P001568	21.591623	24.19055	10.764134	49.237236	-0.26806855	-0.27376306	0.49822736	0.95669746	945678	flgB	flagellar biosynthesis, cell-proximal portion of basal-body rod [b1073]
A_07_P001571	27.817837	32.95716	14.636039	41.307434	-0.32324624	-0.24833083	0.5208041	0.2826332	946687	flgC	flagellar biosynthesis, cell-proximal portion of basal-body rod [b1074]
A_07_P001576	39.120674	44.611755	15.225279	78.17228	-0.23363829	-0.21381187	0.17543429	0.8005754	945813	flgD	flagellar biosynthesis, initiation of hook assembly [b1075]
A_07_P001583	46.67909	62.99118	13.225342	73.84374	-0.18713546	0.075571775	-0.23607153	0.51005244	945636	flgE	flagellar biosynthesis, hook protein [b1076]
A_07_P001588	62.89228	68.45299	24.269594	78.794556	-0.13028407	-0.17772031	0.26651824	0.23041677	945639	flgF	flagellar biosynthesis, cell-proximal portion of basal-body rod [b1077]
A_07_P001593	86.11964	106.09317	18.829376	85.66779	0.077371	0.20862186	-0.34545082	0.10526943	945647	flgG	flagellar biosynthesis, cell-distal portion of basal-body rod [b1078]
A_07_P001599	20.621227	19.82268	7.2012115	38.421276	-0.082380295	-0.30902505	0.17033613	0.85088277	946996	flgH	flagellar biosynthesis, basal-body outer-membrane L [b1079]
A_07_P001601	58.009766	43.645428	23.26246	82.34624	-0.13619375	-0.7163254	0.31604934	0.4047011	947534	flgI	homolog of Salmonella P-ring of flagella basal body [b1080]
A_07_P001608	32.020844	28.85461	14.157756	52.68249	-0.28046632	-0.60034204	0.31265044	0.47333395	947456	flgJ	flagellar biosynthesis [b1081]
A_07_P001612	45.554012	59.910084	10.147032	61.940506	-0.1443826	0.08117175	-0.5403675	0.33441067	945648	flgK	flagellar biosynthesis, hook-filament junction protein 1 [b1082]
A_07_P001620	158.91725	147.42549	31.692764	116.15517	0.32625163	0.04829538	-0.2292633	-0.09048283	945646	flgL	flagellar biosynthesis; hook-filament junction protein [b1083]
A_07_P001621	1380.4788	1853.1787	394.78796	639.72546	0.1259098	0.3810761	0.09042621	-0.94824576	945641	rne	RNase E, membrane attachment, mRNA turnover, maturation 5S RNA [b1084]
A_07_P001627	419.10788	347.458	56.4594	415.4646	0.15093708	-0.28921187	-0.97056305	0.17382956	945640	yceQ	orf, hypothetical protein [b1085]
A_07_P001631	498.0517	681.1456	357.8037	251.91985	-0.086586714	0.19541502	1.2068219	-1.0344296	945637	rluC	orf, hypothetical protein [b1086]
A_07_P001639	366.48068	449.8785	62.24636	417.51678	-0.020459414	0.105673075	-0.8075992	0.20312643	945631	yceF	orf, hypothetical protein [b1087]
A_07_P001644	39126.086	48170.09	8070.9526	10962.434	0.32410812	0.45444918	-0.18267512	-1.475966	945650	yceD	orf, hypothetical protein [b1088]
A_07_P001648	17461.586	17099.127	2601.9626	5397.8833	0.6151581	0.4152298	-0.36081958	-1.0430729	945657	rpmF	50S ribosomal subunit protein L32 [b1089]
A_07_P001651	3234.3494	4419.025	853.92334	1203.7994	0.074566126	0.35515308	-0.07619524	-1.3158252	946165	plsX	glycerolphosphate auxotrophy in plsB background [b1090]
A_07_P001656	2986.4663	4102.444	955.7496	1247.351	0.008843899	0.2972231	0.13564467	-1.215239	946003	fabH	3-oxoacyl- [b1091]
A_07_P001661	6783.5117	9730.612	1702.38	3076.3088	0.09341097	0.4442439	-0.13053131	-1.0119312	945766	fabD	malonyl-CoA- [b1092]
A_07_P001668	9951.806	12577.312	1224.9521	5352.29	0.49049664	0.65862465	-0.76120067	-0.36881685	945645	fabG	3-oxoacyl- [b1093]
A_07_P001671	43243.57	42385.312	7696.254	21325.824	0.5158131	0.31722522	-0.20390868	-0.46858287	944805	acpP	acyl carrier protein [b1094]
A_07_P001676	2949.0144	2218.1084	612.63116	1284.5696	0.5595906	-0.020979404	0.06298423	-0.60386944	946665	fabF	3-oxoacyl- [b1095]
A_07_P001685	169.79262	174.3937	57.145004	131.2692	0.04908371	-0.08200824	0.24854457	-0.28667378	946647	pabC	4-amino-4-deoxychorismate lyase [b1096]
A_07_P001687	4149.0933	3167.5305	778.1594	2024.4061	0.62072253	0.061618328	-0.023401499	-0.37908745	945660	yceG	putative thymidylate kinase [b1097]
A_07_P001692	620.31506	726.927	223.89098	473.97372	-0.03213954	0.027004004	0.2681917	-0.3848443	945663	tmk	thymidylate kinase [b1098]
A_07_P001696	618.2723	664.9869	202.52315	418.83646	0.02729249	-0.03728962	0.18767238	-0.49907446	945661	holB	DNA polymerase III, delta prime subunit [b1099]
A_07_P001704	1194.6782	1453.682	217.02254	1480.3778	-0.03154564	0.081876755	-0.7217163	0.31328583	945656	ycfH	orf, hypothetical protein [b1100]
A_07_P001710	310.23813	327.43622	96.55604	77.901535	0.1891923	0.097364545	0.27579057	-1.7689717	945651	ptsG	PTS system, glucose-specific IIBC component [b1101]
A_07_P001711	66.99311	116.18331	20.333237	94.96114	-0.43316817	0.19148386	-0.38280535	0.10564482	945649	fhuE	outer membrane receptor for ferric iron uptake [b1102]
A_07_P001720	1099.6815	1148.2039	267.09067	1106.7297	0.039823055	-0.067549706	-0.23132479	0.08452916	948549	hinT	orf, hypothetical protein [b1103]
A_07_P001721	1995.9622	1821.9508	311.8324	1828.5156	0.2037313	-0.09753513	-0.70397484	0.11280894	948539	ycfL	orf, hypothetical protein [b1104]
A_07_P001730	2615.2646	2234.265	372.0883	1821.3331	0.4001329	0.003308773	-0.6425729	-0.08634186	948536	ycfM	orf, hypothetical protein [b1105]
A_07_P001731	581.4037	634.02814	163.69354	405.16638	0.12980437	0.085143805	0.07179654	-0.35573387	948525	thiK	putative beta-glucosidase [b1106]
A_07_P001737	1565.8063	1551.6335	213.99866	1306.0282	0.23844886	0.0556643	-0.8622476	0.0122179985	945671	nagZ	orf, hypothetical protein [b1107]
A_07_P001743	17401.816	12992.659	1149.5708	15264.937	0.31082678	-0.2803805	-1.8387084	0.15729856	945676	ycfP	orf, hypothetical protein [b1108]
A_07_P001747	1462.9083	1338.6183	601.9805	182.85097	0.11139774	-0.18636298	0.60088277	-2.8532133	946792	ndh	respiratory NADH dehydrogenase [b1109]
A_07_P001753	1494.4142	603.6298	850.14746	241.33353	0.61906767	-0.8584435	1.5758078	-1.9759246	945977	ycfJ	orf, hypothetical protein [b1110]
A_07_P001759	538.2278	354.2121	296.28683	235.82108	0.38061	-0.3926593	1.2899233	-0.77442575	947425	ycfQ	orf, hypothetical protein [b1111]
A_07_P001765	410.0367	240.51685	549.56604	108.19583	0.47622347	-0.46305776	2.6692982	-1.410396	945492	bhsA	orf, hypothetical protein [b1112]
A_07_P001770	130.23103	138.96089	170.8592	159.98799	-0.18646085	-0.2625221	1.9758089	0.14591753	945666	ycfS	orf, hypothetical protein [b1113]
A_07_P001771	149.42903	178.96326	36.957447	65.44966	0.1323328	0.22286916	-0.112654805	-1.0231819	945681	mfd	transcription-repair coupling factor; mutation frequency decline [b1114]
A_07_P001779	212.0237	195.66692	114.92263	201.63942	-0.30385494	-0.5893465	0.5831176	-0.34081483	945679	ycfT	orf, hypothetical protein [b1115]
A_07_P001781	107.81893	168.54053	42.767014	80.301384	-0.20380092	0.27101803	0.2326945	-0.593426	945673	lolC	orf, hypothetical protein [b1116]
A_07_P001787	212.21965	291.01773	94.4016	141.0895	-0.12212336	0.16375923	0.47973704	-0.675583	945670	lolD	putative ATP-binding component of a transport system [b1117]
A_07_P001793	651.8475	874.6697	175.43954	401.7813	0.045248985	0.29978657	-0.07777631	-0.61738706	945665	lolE	putative kinase [b1118]
A_07_P001798	648.5483	888.8372	196.14815	483.6383	-0.03187394	0.2531643	0.013390899	-0.41967154	945664	nagK	putative NAGC-like transcriptional regulator [b1119]
A_07_P001805	2304.4976	2555.5059	386.00375	1374.5573	0.45449972	0.43398952	-0.35273075	-0.25549793	945687	cobB	putative nicotinic acid mononucleotide:5,6-dimethylbenzimidazole [b1120]
A_07_P001806	70.50004	91.452415	39.08026	85.87048	-0.3107283	-0.10499704	0.6086236	0.009298682	945685	ycfZ	homolog of virulence factor [b1121]
A_07_P001814	141.96042	216.03885	66.70866	139.38075	-0.29250586	0.14362979	0.38848662	-0.28347468	945684	ymfA	orf, hypothetical protein [b1122]
A_07_P001819	2043.4725	1840.9434	358.17337	787.1313	0.64731	0.32706594	-0.094447374	-0.69354844	945682	potD	spermidine/putrescine periplasmic transport protein [b1123]
A_07_P001825	257.9068	116.6268	65.80331	495.85663	0.067308545	-1.247309	-0.13277471	1.0458694	947147	ygaW	orf, hypothetical protein [b2670]
A_07_P001830	221.47885	96.88829	201.48587	183.59062	0.059105754	-1.3033359	1.693151	-0.17608261	947156	ygaC	orf, hypothetical protein [b2671]
A_07_P001832	7113.359	6195.7246	94.65136	6543.808	0.19996524	-0.16895914	-4.2612634	0.11505318	947157	ygaM	orf, hypothetical protein [b2672]
A_07_P001836	73.90483	229.21779	23.98329	441.79034	-0.37858748	1.0847247	-0.23169112	2.2365217	947161	nrdH	glutaredoxin-like protein; hydrogen donor [b2673]
A_07_P001841	68.82634	247.49757	17.665087	607.77466	-0.6877403	0.98897445	-0.8792654	2.4902513	947158	nrdI	orf, hypothetical protein [b2674]
A_07_P001846	53.87037	105.32654	10.7577305	218.89027	-0.3192991	0.47834003	-0.8728816	1.7388334	947155	nrdE	ribonucleoside-diphosphate reductase 2, alpha subunit [b2675]
A_07_P001851	36.41475	76.39046	8.436302	125.86624	-0.43457067	0.4646325	-0.77387595	1.3902137	947149	nrdF	ribonucleoside-diphosphate reductase 2, beta chain, frag [b2676]
A_07_P001859	141.72273	360.0825	155.05324	151.91423	-0.53084815	0.6447418	1.36938	-0.39517426	947148	proV	ATP-binding component of transport system for glycine, betaine and proline [b2677]
A_07_P001861	131.3897	260.52692	138.54851	151.94547	-0.5911726	0.22674108	1.255902	-0.34598255	947145	proW	high-affinity transport system for glycine betaine and proline [b2678]
A_07_P001866	62.178936	157.38844	35.169674	56.193474	-0.35034108	0.8198242	0.5981003	-0.46087623	947165	proX	high-affinity transport system for glycine betaine and proline [b2679]
A_07_P001871	234.71246	226.18765	459.03146	330.59198	-0.30553615	-0.52857673	2.4326973	0.22410858			orf, hypothetical protein [b2680]
A_07_P001880	15.47262	20.060059	17.623325	38.452057	-0.6795651	-0.47462308	1.2787391	0.66926646	2847696	ygaY	putative transport protein [b2681]
A_07_P001881	389.65857	677.7694	107.69039	303.58414	1.513958E-4	0.6290693	-0.08463323	-0.32447457	945093	ygaZ	orf, hypothetical protein [b2682]
A_07_P001889	1094.7002	1997.0682	385.92673	1177.0471	-0.22925353	0.46842742	0.0371449	-0.08912873	945111	ygaH	orf, hypothetical protein [b2683]
A_07_P001891	14855.576	20319.973	3275.5505	11024.677	0.24244022	0.5246668	-0.168221	-0.15234113	945282	mprA	regulator of plasmid mcrB operon [b2684]
A_07_P001896	720.3983	742.25366	149.35245	581.35754	0.26538062	0.13883281	-0.23415756	-0.008500576	947166	emrA	multidrug resistance secretion protein [b2685]
A_07_P001903	458.70084	709.2765	85.38979	283.67444	0.320889	0.78001714	-0.33399343	-0.33694065	947167	emrB	multidrug resistance; probably membrane translocase [b2686]
A_07_P001907	1995.0824	1363.4922	236.88333	884.9163	1.0378058	0.31899738	-0.2658584	-0.099541426	947168	luxS	orf, hypothetical protein [b2687]
A_07_P001912	5005.1875	8738.097	1464.4651	3357.5095	-0.032354355	0.60187507	-0.034869194	-0.5728991	944881	gshA	gamma-glutamate-cysteine ligase [b2688]
A_07_P001920	490.9175	620.81757	297.20013	310.84103	-0.037093163	0.13193011	1.0093969	-0.66090775	945419	yqaA	orf, hypothetical protein [b2689]
A_07_P001923	1088.4392	1113.6251	684.4531	985.14087	0.021750212	-0.11491394	1.1230483	-0.086621046	945776	yqaB	putative phosphatase [b2690]
A_07_P001927	40033.48	43447.637	5245.0195	22078.479	0.46275616	0.4111607	-0.69889617	-0.360322	947176	csrA	carbon storage regulator; controls glycogen synthesis, gluconeogenesis, cell size and surface properties [b2696]
A_07_P001931	7575.8486	8624.524	1719.8749	2309.8386	0.09167194	0.10904288	-0.27689672	-1.5864558	947175	alaS	alanyl-tRNA synthetase [b2697]
A_07_P001938	674.2637	360.22772	572.23553	254.06314	0.64228344	-0.4317863	2.1761146	-0.7303542	947172	recX	regulator, OraA protein [b2698]
A_07_P001941	2732.1736	1661.9364	2611.8423	974.14185	0.4919269	-0.3949232	2.1974819	-0.9604299	947170	recA	DNA strand exchange and renaturation, DNA-dependent ATPase, DNA- and ATP-dependent coprotease [b2699]
A_07_P001946	2250.9766	1564.4882	422.3116	1108.4781	0.69819975	0.0036725998	0.05456376	-0.28828263	947169	ygaD	orf, hypothetical protein [b2700]
A_07_P001954	822.5529	610.91364	249.4026	598.81573	0.20196986	-0.39683652	0.2508732	-0.22053766	947184	mltB	membrane-bound lytic murein transglycosylase B [b2701]
A_07_P001960	29.445072	25.346287	7.676999	89.72474	-0.17695951	-0.5628774	-0.34583586	1.4660087	947575	srlA	PTS system, glucitol/sorbitol-specific IIC component, one of two [b2702]
A_07_P001964	42.842617	47.419453	9.272981	152.26471	-0.1611718	-0.18440568	-0.59857744	1.7037791	948933	srlE	PTS system, glucitol/sorbitol-specific IIB component and second of two IIC components [b2703]
A_07_P001966	69.81379	67.77799	11.938102	147.57988	0.073088646	-0.13927233	-0.7043143	1.1884888	948971	srlB	PTS system, glucitol/sorbitol-specific enzyme IIA component [b2704]
A_07_P001971	34.980904	30.631184	6.502027	56.922153	-0.10109639	-0.4623289	-0.75816697	0.6368146	948937	srlD	glucitol [b2705]
A_07_P001980	47.2204	43.998577	12.153253	143.0802	-0.07080197	-0.3424219	-0.25833428	1.5640281	948938	gutM	glucitol operon activator [b2706]
A_07_P001981	226.31807	300.53555	38.7912	357.23795	-0.10376835	0.13574922	-0.8777838	0.59025264	948942	srlR	regulator for gut [b2707]
A_07_P001990	607.6863	598.6428	141.18022	687.2132	0.14195752	-0.049339533	-0.19329536	0.35487676	947587	gutQ	orf, hypothetical protein [b2708]
A_07_P001994	73.57673	37.4684	46.63085	73.731094	-0.060186625	-1.203428	1.0523841	-0.02167499	947186	norR	putative 2-component transcriptional regulator [b2709]
A_07_P001997	25.406332	20.55489	10.853561	47.12735	-0.14220238	-0.6175753	0.4013133	0.7846621	948979	norV	putative flavodoxin [b2710]
A_07_P002001	31.938536	22.728132	11.109488	55.967915	-0.11050427	-0.7709893	0.13652551	0.7342856	947088	norW	putative oxidoreductase [b2711]
A_07_P002010	160.29985	178.57996	29.643967	229.15158	-0.010010362	-0.023880005	-0.6744375	0.54100645	944963	hypF	transcriptional regulatory protein [b2712]
A_07_P002014	639.7081	824.3051	55.987175	148.4165	1.1642923	1.3603909	-0.57941747	-0.90798175	947190	hydN	involved in electron transport from formate to hydrogen, Fe-S centers [b2713]
A_07_P002018	6.865607	3.8425713	3.0115879	7.0190496	-0.069755554	-1.0767372	0.5119169	-0.0023789406	947305	ascG	ascBF operon repressor [b2714]
A_07_P002021	8.695502	7.005791	4.1342406	10.259309	-0.23131609	-0.71270347	0.46657264	0.042764664	947154	ascF	PTS system enzyme II ABC [b2715]
A_07_P002027	15.833951	5.5977554	9.879651	14.304508	0.036153793	-1.6336133	1.1262	-0.07490957	947460	ascB	6-phospho-beta-glucosidase; cryptic [b2716]
A_07_P002034	121.0388	269.41574	24.42673	171.23476	-0.40099907	0.583699	-0.93940055	0.13499498	947428	hycI	protease involved in processing C-terminal end of the large subunit of hydrogenase 3 [b2717]
A_07_P002036	223.842	535.2892	25.66465	69.89658	0.41760814	1.5057793	-0.936483	-1.2260904	947438	hycH	processing of large subunit [b2718]
A_07_P002044	145.49896	348.32635	7.3533115	35.19521	1.0114148	2.1011803	-1.5245204	-1.0006548	947191	hycG	hydrogenase activity [b2719]
A_07_P002046	420.7409	855.31757	150.99266	193.18224	-0.10301423	0.75084734	0.1890676	-1.190496	947048	hycF	probable iron-sulfur protein of hydrogenase 3 [b2720]
A_07_P002053	505.22278	1248.3301	10.692294	55.032494	1.6194823	2.7548234	-2.1722589	-1.5435939	947396	hycE	large subunit of hydrogenase 3 [b2721]
A_07_P002059	387.5826	499.70718	79.74295	239.48119	0.09536195	0.29227495	-0.41517735	-0.5637417	948994	hycD	membrane-spanning protein of hydrogenase 3 [b2722]
A_07_P002063	152.50868	153.82791	6.9952393	54.146484	0.7898314	0.6325909	-1.8860073	-0.6686326	945327	hycC	membrane-spanning protein of hydrogenase 3 [b2723]
A_07_P002069	239.06252	272.4788	19.334558	95.58716	0.7027167	0.72180665	-1.1548818	-0.5842941	948002	hycB	probable small subunit of hydrogenase-3, iron-sulfur protein [b2724]
A_07_P002073	162.87183	200.27641	9.237652	37.871735	1.225223	1.3538117	-1.144309	-0.8438332	947193	hycA	transcriptional repression of hyc and hyp operons [b2725]
A_07_P002077	278.1392	336.29407	60.89858	194.62706	0.16287398	0.26712346	-0.25791764	-0.316733	947195	hypA	pleiotrophic effects on 3 hydrogenase isozymes [b2726]
A_07_P002083	483.21808	499.6629	24.41417	354.41727	0.2407744	0.119389534	-2.2955742	-0.17096257	947194	hypB	guanine-nucleotide binding protein, functions as nickel donor for large subunit of hydrogenase 3 [b2727]
A_07_P002090	869.3693	853.5277	48.850937	681.55096	0.28338408	0.08718562	-2.0995922	-0.032275915	947192	hypC	pleiotrophic effects on 3 hydrogenase isozymes [b2728]
A_07_P002091	342.11734	332.44443	23.449776	254.19417	0.30769897	0.09665382	-1.7886117	-0.085374	947189	hypD	pleiotrophic effects on 3 hydrogenase isozymes [b2729]
A_07_P002097	3757.2852	4308.37	197.84518	2500.968	0.16520834	0.19299364	-2.3115032	-0.38650703	947182	hypE	plays structural role in maturation of all 3 hydrogenases [b2730]
A_07_P002101	115.128044	99.57147	12.986294	140.23132	0.16380131	-0.21529949	-1.2138407	0.48385918	947181	fhlA	formate hydrogen-lyase transcriptional activator for fdhF, hyc and hyp operons [b2731]
A_07_P002109	99.217	76.06419	48.591484	96.50911	-5.3822994E-4	-0.55357385	0.740114	-0.0049721003	947187	ygbA	orf, hypothetical protein [b2732]
A_07_P002111	521.5114	509.26688	149.00017	337.25934	0.18857098	-0.0153717995	0.15172172	-0.40478086	947206	mutS	methyl-directed mismatch repair [b2733]
A_07_P002119	41.29935	41.516125	23.758017	51.892357	-0.14542818	-0.30754137	0.8274025	0.21946287	947196	pphB	protein phosphatase 2 [b2734]
A_07_P002122	194.40056	199.76743	73.36335	425.51202	-0.20299351	-0.33337116	0.161641	0.962662	947204	ygbI	putative DEOR-type transcriptional regulator [b2735]
A_07_P002127	25.928535	25.193169	8.296682	130.70284	-0.18742228	-0.39859688	-0.060820997	2.181744	947200	ygbJ	putative dehydrogenase [b2736]
A_07_P002131	56.425316	63.5123	15.701617	358.52988	-0.045733094	-0.044705987	-0.120627165	2.657433	947199	ygbK	orf, hypothetical protein [b2737]
A_07_P002137	105.40019	111.493744	30.616901	420.4037	-0.048541784	-0.13712251	-0.061483026	1.9828444	947197	ygbL	putative epimerase/aldolase [b2738]
A_07_P002141	57.287292	63.104294	15.949149	219.52968	-0.0044566393	-0.034599423	-0.078656614	1.9691606	947207	ygbM	orf, hypothetical protein [b2739]
A_07_P002147	26.079245	34.35193	15.251484	140.4283	-0.9269519	-0.69912887	0.06963134	1.5373955	947208	ygbN	putative transport protein [b2740]
A_07_P002151	5794.0317	5539.01	1111.9436	5078.284	0.21126962	-0.023336172	-0.3996799	0.05653119	947210	rpoS	RNA polymerase, sigma S [b2741]
A_07_P002160	16556.127	21577.965	3493.495	16429.508	0.0016005039	0.21412826	-0.47248602	0.026014328	947011	nlpD	lipoprotein [b2742]
A_07_P002163	718.1375	825.1981	182.40417	561.1713	0.08041954	0.11123395	-0.12616634	-0.23991036	944923	pcm	L-isoaspartate protein carboxylmethyltransferase type II [b2743]
A_07_P002166	622.15814	650.8722	132.11963	464.74463	0.27939677	0.17482352	-0.18550456	-0.10595846	947211	surE	survival protein [b2744]
A_07_P002175	984.134	1152.837	234.29399	651.4942	0.19461203	0.2532084	-0.10538745	-0.36500168	947214	truD	putative hydrogenase subunit [b2745]
A_07_P002176	1650.2217	1838.3252	436.10965	1210.7833	0.098345995	0.08441234	-0.05101514	-0.3128848	945057	ispF	orf, hypothetical protein [b2746]
A_07_P002184	845.7451	656.9215	331.6698	481.62103	0.19363332	-0.34053516	0.6136935	-0.5832031	948269	ispD	orf, hypothetical protein [b2747]
A_07_P002189	851.5992	552.1941	309.8809	406.75452	0.30977583	-0.48489022	0.62185013	-0.720752	946033	ftsB	orf, hypothetical protein [b2748]
A_07_P002191	58.6194	58.826027	41.600628	57.239616	-0.042427897	-0.20701802	1.2333347	-0.04130435	947268	ygbE	putative cytochrome oxidase subunit [b2749]
A_07_P002196	56.59618	59.700832	29.58686	81.49882	-0.34096944	-0.43358934	0.4938172	0.22059274	947221	cysC	adenosine 5-phosphosulfate kinase [b2750]
A_07_P002205	22.815304	21.330162	12.830463	35.376366	-0.2534554	-0.5202285	0.6866514	0.41481662	947219	cysN	ATP-sulfurylase [b2751]
A_07_P002209	41.73249	38.182796	34.56366	60.02675	-0.28537405	-0.5832882	1.2132467	0.27454865	947217	cysD	ATP:sulfurylase [b2752]
A_07_P002213	164.56747	240.81314	88.62915	196.0208	-0.31824934	0.061318398	0.5594597	-0.03043437	947215	iap	alkaline phosphatase isozyme conversion, aminopeptidase [b2753]
A_07_P002216	16.46016	7.880939	10.197256	12.573566	0.07210529	-1.1601002	1.1518432	-0.28099108	947213	ygbF	orf, hypothetical protein [b2754]
A_07_P002225	28.440031	33.669067	18.644638	36.448658	-0.2237637	-0.14992905	0.9376094	0.169667	947228	ygbT	orf, hypothetical protein [b2755]
A_07_P002229	16.437592	13.383199	9.006513	20.232063	-0.09390366	-0.5601461	0.80867296	0.24122846	947226	ygcH	orf, hypothetical protein [b2756]
A_07_P002234	10.742566	12.945246	6.4266877	12.7978325	-0.29733407	-0.19791651	0.7320101	-0.009284854	947225	ygcI	orf, hypothetical protein [b2757]
A_07_P002237	21.528934	15.467197	9.523778	18.82947	0.08197951	-0.56475186	0.675844	-0.07581675	947224	ygcJ	orf, hypothetical protein [b2758]
A_07_P002245	12.029425	5.928043	5.142071	7.5083575	0.09418142	-1.0964243	0.63857114	-0.5503285	947223	ygcK	orf, hypothetical protein [b2759]
A_07_P002247	105.40497	85.51969	54.846222	85.70631	0.18503344	-0.28624713	1.0130901	-0.077947736	947222	ygcL	orf, hypothetical protein [b2760]
A_07_P002251	8.083667	6.698395	4.2551775	11.330665	-0.2403884	-0.68124926	0.60435617	0.28225005	947229	ygcB	orf, hypothetical protein [b2761]
A_07_P002256	59.90585	52.552475	47.526512	50.47708	0.03895521	-0.31964874	1.475527	-0.17262459	947230	cysH	3-phosphoadenosine 5-phosphosulfate reductase [b2762]
A_07_P002265	75.35606	88.73194	70.07041	84.59607	-0.15294373	-0.08687973	1.5126734	0.049411774	947231	cysI	sulfite reductase, alpha subunit [b2763]
A_07_P002266	199.66974	295.29022	160.75536	215.24017	-0.29041886	0.104432344	1.1673678	-0.1465993	947239	cysJ	sulfite reductase [b2764]
A_07_P002273	188.35295	247.32887	120.8147	160.92535	-0.10401225	0.11931336	1.0258808	-0.29557073	945123	sscR	putative 6-pyruvoyl tetrahydrobiopterin synthase [b2765]
A_07_P002278	1062.5059	1197.8833	599.1448	1821.2596	-0.4112451	-0.40789557	0.5327954	0.40170908	946114	ygcN	orf, hypothetical protein [b2766]
A_07_P002284	6.1958904	3.8393981	2.4854271	3.302147	0.3900119	-0.47008598	0.84272945	-0.48240757	945120	ygcO	orf, hypothetical protein [b2767]
A_07_P002288	76.771545	148.1491	15.821372	397.27393	-0.46378088	0.3149588	-0.9719418	1.943198	947536	ygcP	putative anti-terminator regulatory protein [b2768]
A_07_P002295	42.567226	45.723442	16.039362	81.23918	-0.16603553	-0.23251045	0.19637346	0.80188525	946413	ygcQ	putative flavoprotein [b2769]
A_07_P002300	36.911415	26.302391	14.153296	50.025352	-0.09482217	-0.753361	0.29278487	0.3792584	947240	ygcR	putative transport protein [b2770]
A_07_P002304	19.658073	15.948311	5.896949	45.921963	0.008214951	-0.46316993	0.041668892	1.2677653	947238	ygcS	putative transport protein [b2771]
A_07_P002306	51.884827	62.052387	18.261965	84.919044	-0.21554506	-0.12703717	0.048519254	0.5307182			orf, hypothetical protein [b2772]
A_07_P002315	12.631918	15.410115	4.6320043	26.391302	-0.1931107	-0.07597315	0.13005948	0.9053662	2847709	ygcU	putative oxidoreductase subunit [b2773]
A_07_P002320	205.49243	279.69974	48.286686	228.28194	-0.05369687	0.22142982	-0.3725499	0.13352203	947232	ygcW	putative oxidoreductase [b2774]
A_07_P002324	50.35011	115.84856	6.6318717	112.96479	-0.30412173	0.72838557	-1.4580929	0.8971728	947248	yqcE	putative transport protein [b2775]
A_07_P002327	70.60325	71.6576	35.006973	118.567635	-0.365103	-0.51338434	0.3933401	0.41828847	946193	ygcE	putative kinase [b2776]
A_07_P002334	192.53697	246.26218	69.540565	150.08562	-0.045735836	0.1396575	0.25559103	-0.36959732	947527	ygcF	orf, hypothetical protein [b2777]
A_07_P002338	22.990803	24.123632	16.370155	35.327534	-0.36568022	-0.46595585	0.91486657	0.28954446	945247	ygcG	orf, hypothetical protein [b2778]
A_07_P002342	28772.305	26066.936	1564.5254	7584.5522	1.1077552	0.79562855	-1.322593	-0.7803016	945032	eno	enolase [b2779]
A_07_P002348	10280.056	9668.233	1313.592	5289.4683	0.6720507	0.41386175	-0.5256722	-0.25111413	946116	pyrG	CTP synthetase [b2780]
A_07_P002353	1118.3258	1290.2135	180.15149	785.1223	0.14454985	0.18115282	-0.71897256	-0.33031297	947254	mazG	orf, hypothetical protein [b2781]
A_07_P002358	9.34185	2.3130622	4.0799265	7.3662124	0.57971525	-1.6038553	1.1550853	0.27241802	947252	chpA	probable growth inhibitor, PemK-like, autoregulated [b2782]
A_07_P002361	15.35255	7.9245505	6.0514746	12.322386	0.08776772	-1.035976	0.5151838	-0.19394076	947245	chpR	suppressor of inhibitory function of ChpA, PemI-like, autoregulated [b2783]
A_07_P002368	1243.5844	1631.5955	351.51636	1079.908	0.005483389	0.227597	-0.046821356	-0.16262484	947244	relA	(p)ppGpp synthetase I/GTP pyrophosphokinase [b2784]
A_07_P002371	318.59238	567.61554	72.34076	534.8654	-0.34279513	0.3207407	-0.7110914	0.4401567	947243	rumA	putative enzyme [b2785]
A_07_P002376	212.20415	215.53162	62.903194	148.14156	0.08221209	-0.06500757	0.09850001	-0.40077615	947255	barA	sensor-regulator, activates OmpR by phophorylation [b2786]
A_07_P002384	165.44739	114.07599	41.194054	81.71854	0.47828686	-0.22775698	0.24295735	-0.5038625	947258	gudD	putative glucarate dehydratase [b2787]
A_07_P002387	50.477013	35.47161	21.283422	39.204292	0.061374903	-0.6172533	0.5860142	-0.26775205	947261	gudX	putative glucarate dehydratase [b2788]
A_07_P002391	54.083614	70.05705	20.153902	97.873405	-0.27355576	-0.069883466	0.07284713	0.6176573	947265	gudP	putative transport protein [b2789]
A_07_P002396	453.4086	501.17697	118.065285	614.06726	-0.051096678	-0.07625437	-0.22178817	0.42197704	947151	yqcA	orf, hypothetical protein [b2790]
A_07_P002405	223.98601	238.33977	84.882675	155.02332	0.0026160479	-0.07743919	0.37328482	-0.49281955	947242	truC	orf, hypothetical protein [b2791]
A_07_P002409	265.85483	240.14812	99.29426	181.34396	0.1893053	-0.12707508	0.5389848	-0.3271159	946027	yqcC	orf, hypothetical protein [b2792]
A_07_P002413	1499.3636	1880.6008	478.00528	1039.05	0.076385975	0.23356318	0.19766903	-0.4172113	947271	syd	interacts with secY [b2793]
A_07_P002417	703.63477	1097.9956	200.92479	563.2079	0.018051624	0.4903586	-0.01958406	-0.2676196	947270	queF	orf, hypothetical protein [b2794]
A_07_P002424	13995.668	21353.373	1073.2993	27577.709	-0.21023703	0.22958016	-2.1445575	0.80377245	947266	ygdH	orf, hypothetical protein [b2795]
A_07_P002426	300.27365	736.81757	267.01636	594.8476	-0.9471556	0.17820764	0.65403056	0.07457566	947264	sdaC	probable serine transporter [b2796]
A_07_P002432	1272.8574	1287.0991	257.93237	455.55966	0.36419272	0.2105794	-0.16827726	-1.0826778	946324	ddlB	D-alanine-D-alanine ligase B, affects cell division [b0092]
A_07_P002438	1848.2142	1351.6456	430.4812	492.9613	0.4456153	-0.17546558	0.11404085	-1.4254818	944823	ftsQ	cell division protein; ingrowth of wall at septum [b0093]
A_07_P002441	7459.974	4884.3057	1548.6312	3057.3193	0.67388225	-0.10680175	0.17623973	-0.577533	944778	ftsA	ATP-binding cell division protein, septation process, complexes with FtsZ, associated with junctions of inner and outer membranes [b0094]
A_07_P002447	10567.433	10779.715	1633.0424	6874.349	0.3576815	0.21670914	-0.56577396	-0.22716069	944786	ftsZ	cell division; forms circumferential ring; tubulin-like GTP-binding protein and GTPase [b0095]
A_07_P002451	8733.478	9218.43	3141.1743	5425.798	0.080244064	-0.011456966	0.3755281	-0.57098794	944816	lpxC	UDP-3-O-acyl N-acetylglucosamine deacetylase; lipid A biosynthesis [b0096]
A_07_P002459	1243.6008	1216.2445	296.86362	532.9367	0.28159928	0.079843044	-0.014516473	-0.9054005	944831	secM	orf, hypothetical protein [b0097]
A_07_P002461	918.67	1250.2122	223.1126	258.72147	0.08813524	0.36302304	-0.18310368	-1.7045237	944821	secA	preprotein translocase; secretion protein [b0098]
A_07_P002469	141.39264	199.36665	57.369392	100.1448	-0.13857675	0.18747413	0.33060515	-0.6007079	944824	mutT	7,8-dihydro-8-oxoguanine-triphosphatase, prefers dGTP, causes AT-GC transversions [b0099]
A_07_P002475	689.78375	718.7677	230.12097	450.86215	0.07302022	-0.037264347	0.2598039	-0.50494885	945630	yacG	orf, hypothetical protein [b0101]
A_07_P002479	1192.3973	1020.19476	277.07632	767.4409	0.39226413	-0.0024225712	0.057290435	-0.20798564	944873	yacF	orf, hypothetical protein [b0102]
A_07_P002481	858.21844	578.0719	266.1038	438.04108	0.38043857	-0.35932446	0.46161723	-0.55435205	949060	coaE	putative DNA repair protein [b0103]
A_07_P002490	2957.8408	3594.917	490.62326	2574.433	0.18033886	0.29208612	-0.64098334	0.015537024	948986	guaC	GMP reductase [b0104]
A_07_P002493	21.616972	17.953106	8.4694395	46.06448	-0.30652332	-0.7441201	0.11218655	0.8204552	945806	hofC	putative integral membrane protein involved in biogenesis of fimbriae, protein transport, DNA uptake [b0106]
A_07_P002496	39.764965	37.490883	16.889753	81.253174	-0.26889682	-0.5235214	0.26628846	0.7975173	947481	hofB	putative integral membrane protein involved in biogenesis of fimbriae, protein transport, DNA uptake [b0107]
A_07_P002501	16.326626	20.542318	9.6471	40.6121	-0.60006773	-0.438362	0.41140807	0.75010324	945817	ppdD	prelipin peptidase dependent protein [b0108]
A_07_P002509	916.9633	802.51953	169.57155	527.85077	0.59348845	0.23149371	-0.07094669	-0.16775775	948869	nadC	quinolinate phosphoribosyltransferase [b0109]
A_07_P002511	468.41766	660.2668	82.89555	938.96436	-0.13190174	0.19368577	-0.8597952	0.9068618	948877	ampD	regulates ampC [b0110]
A_07_P002518	352.01886	502.1841	97.120094	802.0385	-0.22796535	0.11493182	-0.3152405	0.99554133	946678	ampE	regulates ampC [b0111]
A_07_P002521	362.7336	391.57474	123.339066	610.88416	-0.12702584	-0.18631577	0.08722854	0.6604507	946018	aroP	aromatic amino acid transport protein [b0112]
A_07_P002527	7845.941	7988.7007	1026.4873	716.40735	0.7239721	0.58032036	-0.43972182	-2.6936338	944827	pdhR	transcriptional regulator for pyruvate dehydrogenase complex [b0113]
A_07_P002535	17810.889	20631.232	2356.551	3450.2935	0.52838635	0.57079124	-0.6190889	-1.8040936	944834	aceE	pyruvate dehydrogenase [b0114]
A_07_P002536	7218.3643	7394.807	1281.2562	1509.1104	0.35519695	0.22037077	-0.36838198	-1.8672898	944794	aceF	pyruvate dehydrogenase [b0115]
A_07_P002541	13639.536	15802.158	1941.1888	8625.38	0.22370839	0.2663684	-0.81853867	-0.4019382	944854	lpd	lipoamide dehydrogenase [b0116]
A_07_P002546	24.457226	21.338625	12.548261	57.605934	-0.3211367	-0.6875963	0.48662537	0.9503081	944868	yacH	putative membrane protein [b0117]
A_07_P002554	2440.981	3711.2068	697.5163	3422.63	-0.16059804	0.2741623	-0.19722605	0.36253333	944864	acnB	aconitate hydrase B [b0118]
A_07_P002559	937.38354	862.1316	575.5976	1203.3715	-0.12375116	-0.41414905	0.9432051	0.27210784	944809	yacL	orf, hypothetical protein [b0119]
A_07_P002565	6309.83	7844.1104	766.4721	2632.742	0.51082134	0.6551635	-0.7599397	-0.71472526	947719	speD	S-adenosylmethionine decarboxylase [b0120]
A_07_P002568	4770.721	7114.3086	679.35815	2356.886	0.46335196	0.8702009	-0.57807565	-0.51848626	947726	speE	spermidine synthase = putrescine aminopropyltransferase [b0121]
A_07_P002572	756.649	1320.8496	410.3122	867.8254	-0.52952194	0.10458183	0.3581102	-0.29625392	948472	yacC	orf, hypothetical protein [b0122]
A_07_P002577	149.94153	199.98695	60.967655	131.50165	-0.21169615	0.03414297	0.26055467	-0.3655275	947736	cueO	orf, hypothetical protein [b0123]
A_07_P002585	597.3482	897.95013	189.73079	208.94823	-0.10433626	0.3140607	0.011580586	-1.5842745	944830	gcd	glucose dehydrogenase [b0124]
A_07_P002588	2930.9968	4036.0312	858.15546	1559.6835	0.0679121	0.359792	0.06636715	-0.80673766	946624	hpt	hypoxanthine phosphoribosyltransferase [b0125]
A_07_P002595	3897.925	5231.0723	883.6064	1847.9626	0.17878747	0.43352175	-0.19190788	-0.8624952	944832	can	putative carbonic anhdrase [b0126]
A_07_P002599	930.185	1133.9973	251.90453	609.06647	0.08140063	0.1975615	-0.03270507	-0.49402976	944833	yadG	putative ATP-binding component of a transport system [b0127]
A_07_P002602	362.91278	489.35452	89.274895	255.4403	0.1593585	0.42094946	-0.09340227	-0.3117901	944836	yadH	orf, hypothetical protein [b0128]
A_07_P002609	408.59943	582.07623	112.90894	1399.2089	-0.11347389	0.22738123	-0.19846547	1.6978667	947397	yadI	putative PTS enzyme II B component [b0129]
A_07_P002611	91.90445	113.40386	51.70957	119.5907	-0.36342025	-0.22982335	0.5774121	0.051966906	946536	yadE	orf, hypothetical protein [b0130]
A_07_P002617	3283.945	3740.9631	738.7801	2014.421	0.21420574	0.23251915	-0.16747189	-0.45537066	945686	panD	aspartate 1-decarboxylase [b0131]
A_07_P002621	2271.7114	2990.9255	1156.5244	2676.3467	-0.41857052	-0.1914258	0.37798047	-0.1465981	944781	yadD	orf, hypothetical protein [b0132]
A_07_P002626	1228.607	1160.1837	298.59177	617.4126	0.2567463	0.0044107437	-0.013494968	-0.7004819	944958	panC	pantothenate synthetase [b0133]
A_07_P002634	310.86526	276.86227	60.389862	105.65624	0.4512229	0.11443508	-0.1421535	-1.0702014	944839	panB	3-methyl-2-oxobutanoate hydroxymethyltransferase [b0134]
A_07_P002639	14.6020155	18.332891	8.307642	17.70487	-0.20104289	-0.04244232	0.75583607	0.112424254	944837	yadC	putative fimbrial-like protein [b0135]
A_07_P002643	14.227577	15.786631	13.143428	14.831627	-0.24729955	-0.26695275	1.4088871	-0.15182495	944835	yadK	putative fimbrial protein [b0136]
A_07_P002647	83.91231	95.59126	40.493896	133.40506	-0.36028886	-0.34195852	0.35906863	0.3440585	944829	yadL	putative fimbrial protein [b0137]
A_07_P002652	93.22823	111.860565	42.147915	132.4243	-0.20888782	-0.115691185	0.41634214	0.33292925	944828	yadM	putative fimbrial-like protein [b0138]
A_07_P002658	23.073689	22.332907	13.453102	24.085901	-0.012262702	-0.22900641	0.979963	0.08516562	944819	htrE	probable outer membrane porin protein involved in fimbrial assembly [b0139]
A_07_P002665	18.865894	40.677414	21.720282	28.94788	-0.8092457	0.1295358	1.164552	-0.15608013	944859	ecpD	probable pilin chaperone similar to PapD [b0140]
A_07_P002670	6.3648424	5.133157	5.362421	7.4087873	-0.06650269	-0.5464473	1.4567925	0.18809807	944841	yadN	putative fimbrial-like protein [b0141]
A_07_P002673	27.067461	25.125563	20.038044	28.601992	-0.1707803	-0.44785058	1.165937	-0.055736303	948792	folK	7,8-dihydro-6-hydroxymethylpterin- pyrophosphokinase [b0142]
A_07_P002676	1159.6348	1130.0657	343.90338	720.0874	0.064115286	-0.14281464	0.08105469	-0.58782315	947318	pcnB	poly [b0143]
A_07_P002682	99.63787	134.33546	37.056423	85.266075	-0.034897447	0.226511	0.30866742	-0.22413158	944846	yadB	putative tRNA synthetase [b0144]
A_07_P002686	1547.4943	1063.2717	293.1863	1259.0756	0.31461048	-0.3964789	-0.3148979	0.05253005	944850	dksA	dnaK suppressor protein [b0145]
A_07_P002692	2098.098	2104.731	285.23984	3047.9421	0.028717041	-0.1363957	-1.0795815	0.60295916	944855	sfsA	probable regulator for maltose metabolism [b0146]
A_07_P002698	194.3816	307.2588	69.78821	217.37495	-0.20356643	0.2873292	0.08913195	-0.006784916	944848	ligT	orf, hypothetical protein [b0147]
A_07_P002702	148.56004	145.79675	37.505497	101.137375	0.17378342	-0.022970796	-0.04155326	-0.34545803	944845	hrpB	helicase, ATP-dependent [b0148]
A_07_P002706	85.12345	97.74015	59.48083	69.78828	-0.1046623	-0.074934006	1.1487414	-0.35574603	944843	mrcB	peptidoglycan synthetase; penicillin-binding protein 1B [b0149]
A_07_P002712	9.2825575	8.492949	2.7199926	7.0404897	0.14101446	-0.15690875	0.14063036	-0.22234404	944856	fhuA	outer membrane protein receptor for ferrichrome, colicin M, and phages T1, T5, and phi80 [b0150]
A_07_P002719	1032.9257	2098.811	191.18715	755.5614	0.28695846	1.1401279	-0.3761853	-0.12866926	945250	fhuC	ATP-binding component of hydroxymate-dependent iron transport [b0151]
A_07_P002724	144.00763	296.3113	33.5321	108.763084	0.11199641	0.983299	-0.21999836	-0.25747168	947510	fhuD	hydroxamate-dependent iron uptake, cytoplasmic membrane component [b0152]
A_07_P002726	131.64311	141.0113	34.7499	75.439514	0.23187506	0.16138685	0.08085871	-0.5358777	946890	fhuB	hydroxamate-dependent iron uptake, cytoplasmic membrane component [b0153]
A_07_P002734	726.3098	852.1386	227.34352	751.20575	-0.042998552	0.017838001	0.05182588	0.0411129	946892	hemL	glutamate-1-semialdehyde aminotransferase [b0154]
A_07_P002737	1471.948	1150.6139	306.21393	1328.4124	0.27734947	-0.2476399	-0.21722925	0.16481423	946715	clcA	putative channel transporter [b0155]
A_07_P002744	5115.0303	4122.757	2126.1638	3990.2466	0.12359381	-0.3572054	0.6276386	-0.19918251	944857	erpA	orf, hypothetical protein [b0156]
A_07_P002749	192.82985	187.71803	115.32292	142.1345	0.080032706	-0.12839425	1.1089191	-0.32455063	949062	yadS	orf, hypothetical protein [b0157]
A_07_P002753	334.45224	443.9412	101.51408	300.71918	-0.04815817	0.19074392	0.0022563934	-0.16605401	947574	btuF	orf, hypothetical protein [b0158]
A_07_P002758	1179.273	1117.0099	328.63037	546.60925	0.14952111	-0.09839964	0.07669735	-0.92430615	948542	mtn	orf, hypothetical protein [b0159]
A_07_P002763	429.85248	455.60092	130.15565	501.28333	-0.10284829	-0.18858576	-0.055917144	0.15442443	947177	dgt	deoxyguanosine triphosphate triphosphohydrolase [b0160]
A_07_P002766	12520.978	6718.247	2634.0127	2237.5344	0.840575	-0.2272811	0.3620975	-1.6083026	947139	degP	periplasmic serine protease Do; heat shock protein HtrA [b0161]
A_07_P002772	124.498604	176.40552	119.37045	281.01724	-0.7743492	-0.44124925	0.9355025	0.4356681	944860	cdaR	orf, hypothetical protein [b0162]
A_07_P002780	185.5536	211.66472	74.76034	254.24634	-0.2378813	-0.21760285	0.22116399	0.2519983	947044	yaeH	putative structural protein [b0163]
A_07_P002781	51.254116	75.16556	22.619602	63.776505	-0.3758905	0.006847739	0.21455109	-0.025044918	945002	yaeI	orf, hypothetical protein [b0164]
A_07_P002786	2229.7517	2751.4343	357.15106	1334.3221	0.35676122	0.49039602	-0.5149802	-0.34852695	944862	dapD	2,3,4,5-tetrahydropyridine-2-carboxylate N-succinyltransferase [b0166]
A_07_P002791	382.50638	385.28564	54.678925	366.16034	0.120043755	-0.03917861	-0.91584826	0.092523575	944863	glnD	protein PII; uridylyltransferase acts on regulator of glnA [b0167]
A_07_P002799	1235.7455	1432.6461	231.723	712.9553	0.3052063	0.34884048	-0.33916724	-0.45280385	947882	map	methionine aminopeptidase [b0168]
A_07_P002803	22653.066	26697.662	4011.0593	7035.0083	0.40568948	0.47302914	-0.32142663	-1.2459047	947874	rpsB	30S ribosomal subunit protein S2 [b0169]
A_07_P002806	24572.4	26879.17	3797.8882	7084.752	0.4858513	0.44563532	-0.4373815	-1.2729094	944866	tsf	protein chain elongation factor EF-Ts [b0170]
A_07_P002814	7473.938	8585.48	890.0031	2209.3079	0.71576786	0.7461324	-0.583683	-1.0070181	944989	pyrH	uridylate kinase [b0171]
A_07_P002818	4161.9546	5138.234	809.55646	2440.7825	0.2915616	0.42590714	-0.29996014	-0.44286728	946122	frr	ribosome releasing factor [b0172]
A_07_P002823	438.78616	480.6135	128.50325	215.93748	0.028658152	-0.009649992	0.027479768	-0.95875883	945019	dxr	putative ATP-binding component of a transport system [b0173]
A_07_P002826	1244.243	1314.2565	504.59964	877.4877	0.06705761	-0.023629904	0.53553605	-0.4012723	944874	ispU	orf, hypothetical protein [b0174]
A_07_P002831	1575.6973	1626.2332	591.56824	926.71436	0.02229762	-0.10182452	0.3794582	-0.70800805	944876	cdsA	CDP-diglyceride synthetase [b0175]
A_07_P002836	5730.789	4111.9517	1133.9299	1523.94	0.652611	0.0040340424	0.08574414	-1.2228281	944871	rseP	orf, hypothetical protein [b0176]
A_07_P002842	5828.47	6960.5337	1194.3743	1831.4225	0.23528337	0.3216982	-0.2810433	-1.3993807	944870	bamA	orf, hypothetical protein [b0177]
A_07_P002847	8425.771	7906.7793	973.0709	2899.1672	0.8434801	0.58209515	-0.5001769	-0.66020346	944861	skp	histone-like protein, located in outer membrane or nucleoid [b0178]
A_07_P002851	2159.2705	2595.1638	260.9811	792.1711	0.6584511	0.7540655	-0.61954105	-0.7527211	944882	lpxD	UDP-3-O- [b0179]
A_07_P002859	3769.5	5279.0415	895.341	1621.2699	0.13996577	0.4562025	-0.16336155	-1.0417945	944888	fabZ	(3R)-hydroxymyristol acyl carrier protein dehydratase [b0180]
A_07_P002865	876.09314	1059.3773	209.73299	440.59692	0.24684286	0.35123587	-0.045152426	-0.70929456	944849	lpxA	UDP-N-acetylglucosamine acetyltransferase; lipid A biosynthesis [b0181]
A_07_P002870	498.16956	509.46286	83.98078	297.963	0.3879969	0.2506709	-0.40997314	-0.31801856	944838	lpxB	tetraacyldisaccharide-1-P; lipid A biosynthesis, penultimate step [b0182]
A_07_P002875	1960.6245	1917.1189	483.0469	743.19977	0.26856422	0.066524744	0.018021107	-1.0954392	944852	rnhB	RNAse HII, degrades RNA of DNA-RNA hybrids [b0183]
A_07_P002878	2728.7317	3557.267	764.0429	788.57025	0.09644961	0.3093214	0.030479908	-1.6589813	944877	dnaE	DNA polymerase III, alpha subunit [b0184]
A_07_P002882	1498.0975	1390.0378	489.23032	721.6981	0.12721872	-0.15045524	0.2832079	-0.8909576	944895	accA	acetylCoA carboxylase, carboxytransferase component, alpha subunit [b0185]
A_07_P002888	284.2351	277.97507	40.682137	278.08917	0.12255561	-0.07924008	-0.9115263	0.12650633	944887	ldcC	lysine decarboxylase 2, constitutive [b0186]
A_07_P002894	235.60559	261.16058	100.7407	278.80576	-0.14941001	-0.17051291	0.39539802	0.1289643	944875	yaeR	orf, hypothetical protein [b0187]
A_07_P002899	42.200592	42.108345	31.839334	37.253365	0.0070604086	-0.16576314	1.3711429	-0.13734412	944889	tilS	cell cycle protein [b0188]
A_07_P002901	2102.4158	1330.233	601.5024	2091.161	0.081160545	-0.7488742	0.046290636	0.1089046	944891	rof	orf, hypothetical protein [b0189]
A_07_P002906	508.90714	671.2388	173.96608	511.57913	-0.13084722	0.09890962	0.09109163	-0.087803364	946809	yaeQ	orf, hypothetical protein [b0190]
A_07_P002914	553.5588	777.37634	184.94438	528.453	-0.11289573	0.20731497	0.07599485	-0.1443696	946046	yaeJ	orf, hypothetical protein [b0191]
A_07_P002917	434.41293	417.90445	119.36694	416.59927	0.08973336	-0.13582611	-0.003394246	0.06481576	946782	nlpE	copper homeostasis protein [b0192]
A_07_P002925	43.82172	63.396027	18.377998	61.35546	-0.45524406	-0.0921644	0.061624587	0.06578958	944892	yaeF	orf, hypothetical protein [b0193]
A_07_P002927	838.7883	877.4018	167.11153	535.7352	0.36992717	0.2651925	-0.1870321	-0.24137092	949116	proS	proline tRNA synthetase [b0194]
A_07_P002932	595.03754	647.2151	226.20462	578.05164	-0.09337735	-0.1417799	0.2818054	-0.0996716	949112	yaeB	orf, hypothetical protein [b0195]
A_07_P002940	682.1117	798.6589	157.23854	591.8252	0.077619076	0.13552523	-0.26889813	-0.09173012	949113	rcsF	regulator in colanic acid synthesis; interacts with RcsB [b0196]
A_07_P002943	1506.2122	1124.5751	135.72357	636.2163	0.9877057	0.39649487	-0.71394014	-0.22014141	944893	metQ	putative lipoprotein [b0197]
A_07_P002950	3743.8948	2396.3303	580.67084	1229.1423	0.89024687	0.07686734	-0.02796483	-0.68115306	944894	metI	putative transport system permease protein [b0198]
A_07_P002955	1322.8357	516.14886	247.019	332.63235	1.0756989	-0.45174265	0.42529428	-0.88044703	944896	metN	ATP-binding component of a transporter [b0199]
A_07_P002958	1544.2141	2233.0352	406.4766	1562.7041	-0.07719946	0.28526783	-0.23229098	-0.024538755	944879	gmhB	putative phosphatase [b0200]
A_07_P002965	49.358593	58.605953	92.67395	38.73031	-0.09031534	-0.012235999	2.5890827	-0.4046656	944901	dkgB	putative aldose reductase [b0207]
A_07_P002968	72.050575	50.276176	49.34724	69.758965	0.044788837	-0.6440126	1.2692833	0.03364575	947507	yafC	putative transcriptional regulator LYSR-type [b0208]
A_07_P002974	566.43225	888.9048	257.75134	842.7755	-0.49783874	-0.01738	0.13677287	0.11089444	946286	yafD	orf, hypothetical protein [b0209]
A_07_P002978	128.07088	108.606606	87.11383	115.43591	-0.074535966	-0.4820335	1.1400306	-0.18889868	946197	yafE	putative biotin synthesis protein [b0210]
A_07_P002982	182.25725	129.4823	68.91033	144.52098	0.15685856	-0.5060291	0.5242102	-0.14235044	945694	mltD	transcriptional regulator for nitrite reductase [b0211]
A_07_P002988	881.7113	835.29193	90.47043	664.175	0.38290524	0.1352129	-1.1313474	0.009650946	944902	gloB	probable hydroxyacylglutathione hydrolase [b0212]
A_07_P002995	68.099976	87.639206	35.234715	79.05719	-0.22999799	-0.035742283	0.5898806	0.020732403	944903	yafS	orf, hypothetical protein [b0213]
A_07_P002996	89.85392	121.77727	47.87139	75.07034	-0.15161538	0.11730993	0.7105025	-0.3754655	946955	rnhA	RNase HI, degrades RNA of DNA-RNA hybrids, participates in DNA replication [b0214]
A_07_P003004	795.4738	854.96375	215.8393	613.9345	0.09108734	0.02546978	-0.020233512	-0.24715328	946441	dnaQ	DNA polymerase III, epsilon subunit [b0215]
A_07_P003008	28.07238	22.459984	11.1126175	23.373959	0.023738027	-0.467723	0.45732027	-0.20502317	949009	yafT	putative aminopeptidase [b0217]
A_07_P003014	11.540469	3.1261606	2.351243	5.4266005	0.8564006	-1.1975039	0.33172965	-0.19669294	946644	yafU	orf, hypothetical protein [b0218]
A_07_P003018	137.33775	195.77986	25.586407	233.51224	-0.1260196	0.21581852	-0.77976274	0.6752385	946585	yafV	putative EC 3.5. amidase-type enzyme [b0219]
A_07_P003021	3783.4448	1292.4705	1490.4039	1816.1849	0.514204	-1.2050314	0.9407425	-0.50909615	946530	ivy	orf, hypothetical protein [b0220]
A_07_P003030	53.686436	28.017479	93.32794	50.85322	0.031362534	-1.0765339	2.5996494	-0.0113681555	946588	wcaI	putative colanic biosynthesis glycosyl transferase [b2050]
A_07_P003032	29.48047	18.506607	35.0402	31.69576	-0.061973214	-0.90335834	1.9578137	0.07804549	946559	gmm	GDP-mannose mannosyl hydrolase [b2051]
A_07_P003038	19.203617	9.8770275	19.070227	20.697952	-0.037298083	-1.1661935	1.7231815	0.1063	946563	fcl	putative nucleotide di-P-sugar epimerase or dehydratase [b2052]
A_07_P003043	47.220245	20.092798	105.76889	40.8941	-0.008057833	-1.4104512	2.925916	-0.18008196	946562	gmd	GDP-D-mannose dehydratase [b2053]
A_07_P003047	37.99056	21.395906	100.012085	36.17308	-0.0050656796	-1.0030379	3.1619315	-0.040302157	946578	wcaF	putative transferase [b2054]
A_07_P003051	42.148502	13.351329	110.41131	37.528896	-0.15034544	-1.9785097	3.009525	-0.28233624	946543	wcaE	putative colanic acid biosynthesis glycosyl transferase [b2055]
A_07_P003060	34.433674	11.938992	81.8389	42.69854	-0.27847493	-1.97628	2.7410278	0.06737995	946550	wcaD	putative colanic acid polymerase [b2056]
A_07_P003061	28.10597	17.383326	24.55252	45.485363	-0.14721954	-1.0100586	1.4283104	0.5827944	946579	wcaC	putative glycosyl transferase [b2057]
A_07_P003070	31.464334	16.736746	34.32915	41.211143	-0.30544078	-1.3858052	1.5908116	0.11936426	946573	wcaB	putative transferase [b2058]
A_07_P003074	41.0207	26.32309	21.163317	74.13568	-0.19799423	-1.0076832	0.61775523	0.6913104	946570	wcaA	putative regulator [b2059]
A_07_P003076	24.138197	13.852021	32.631943	32.76601	-0.095192075	-1.06608	2.1103103	0.38117802	946567	wzc	orf, hypothetical protein [b2060]
A_07_P003081	934.23114	749.02997	1128.898	626.135	-0.17054296	-0.6589663	1.8730559	-0.71236134	946564	wzb	probable protein-tyrosine-phosphatase [b2061]
A_07_P003089	12.854153	3.559757	29.80498	18.416983	-0.115611196	-2.1376615	2.868243	0.43867874	946558	wza	putative polysaccharide export protein [b2062]
A_07_P003091	700.3716	873.0528	159.75829	455.65695	0.2222879	0.3705697	-0.13940668	-0.36239648	946566	yegH	putative transport protein [b2063]
A_07_P003099	230.6174	190.64813	91.558876	154.18977	0.14871609	-0.2955395	0.5865216	-0.39659047	946582	asmA	suppressor of ompF assembly mutants [b2064]
A_07_P003102	1284.1306	1462.3176	461.2159	1112.5421	-0.06905341	-0.05125594	0.22420382	-0.24049854	946593	dcd	2-deoxycytidine 5-triphosphate deaminase [b2065]
A_07_P003108	588.0604	621.5773	141.6134	500.3193	0.15775847	0.068060875	-0.12571287	-0.039868116	946597	udk	uridine/cytidine kinase [b2066]
A_07_P003112	114.54062	144.06444	25.29833	169.17375	-0.10510433	0.056084514	-0.5133138	0.4930302	946600	yegE	putative sensor-type protein [b2067]
A_07_P003118	62.653393	79.672874	22.047228	97.08913	-0.28762388	-0.110594034	-0.023883581	0.3797816	947371	alkA	3-methyl-adenine DNA glycosylase II, inducible [b2068]
A_07_P003121	96.18449	122.81345	60.84705	58.026756	-0.05540681	0.12751937	1.0545121	-0.7490045	947234	yegD	putative heat shock protein [b2069]
A_07_P003126	51.27123	41.635017	27.257969	79.66624	-0.19708753	-0.66710603	0.66197693	0.47421944	947159	yegI	putative chaperonin [b2070]
A_07_P003132	4.9091835	6.4257784	6.041993	8.590768	-0.48559391	-0.26687205	1.584483	0.35719824	947201	yegJ	orf, hypothetical protein [b2071]
A_07_P003139	40.393547	23.93599	11.379443	47.696274	0.28678048	-0.6378293	0.22962123	0.5620209	947269	yegK	orf, hypothetical protein [b2072]
A_07_P003144	18.238422	13.363582	14.331352	24.857784	-0.26062226	-0.87896276	1.1621068	0.22158277	946602	yegL	orf, hypothetical protein [b2073]
A_07_P003146	189.95618	133.88565	99.18932	140.61798	0.094554424	-0.5797771	0.9276805	-0.3038429	946604	mdtA	putative membrane protein [b2074]
A_07_P003154	103.06494	103.03075	40.301052	53.84365	0.10499716	-0.0651474	0.5208683	-0.7962203	946606	mdtB	orf, hypothetical protein [b2075]
A_07_P003159	38.316425	35.34178	17.210407	30.649525	0.06893706	-0.21731722	0.68479115	-0.21767282	946608	mdtC	orf, hypothetical protein [b2076]
A_07_P003163	87.081764	86.03838	47.702583	74.63724	0.037845373	-0.14921105	0.94007754	-0.14914179	946601	mdtD	putative transport protein [b2077]
A_07_P003170	188.9979	152.85426	46.182137	149.38805	0.2491399	-0.22673988	-0.013287783	-0.054677606	946611	baeS	sensor protein [b2078]
A_07_P003174	1410.63	1523.2289	970.6233	1189.2919	0.022953987	-0.035918713	1.2541335	-0.18779421	946605	baeR	transcriptional response regulatory protein [b2079]
A_07_P003180	437.3539	178.54684	20.318954	1518.3501	0.55705166	-0.9051131	-2.1003158	2.388172	947095	yegP	orf, hypothetical protein [b2080]
A_07_P003182	2544.86	2906.8835	858.50214	2304.615	0.034496307	0.05671692	0.2373395	-0.07307577	946609	yegQ	orf, hypothetical protein [b2081]
A_07_P003186	12.666006	10.341257	6.8947015	11.042562	-0.09804058	-0.56025684	0.7950935	-0.26043916	945404	ogrK	prophage P2 ogr protein [b2082]
A_07_P003195	11.72402	11.187676	6.778519	13.8194685	-0.17287076	-0.41009402	0.8072394	0.099852085			orf, hypothetical protein [b2084]
A_07_P003199	25.554384	25.462496	14.048132	26.65723	-0.07821107	-0.25307453	0.8291318	0.018232822	946613	yegR	orf, hypothetical protein [b2085]
A_07_P003204	302.85013	146.53105	49.332775	299.05182	0.2979418	-0.91912186	-0.5495087	0.31522167	946626	yegS	orf, hypothetical protein [b2086]
A_07_P003208	284.70804	353.14038	72.31958	184.67207	0.09014201	0.23123431	-0.11634791	-0.4988873			split galactitol utilization operon repressor, interrupted [b2087]
A_07_P003211	412.59906	559.6492	112.76324	306.2927	-0.0061531067	0.26396322	-0.10706103	-0.4004941			split galactitol utilization operon repressor, fragment 2 [b2090]
A_07_P003220	35.61605	22.936998	20.866617	57.818256	-0.5339067	-1.3384237	0.46529758	0.20057905	946598	gatD	galactitol-1-phosphate dehydrogenase [b2091]
A_07_P003225	104.22992	88.23317	58.728737	98.66386	-0.077495575	-0.4875387	0.86540914	-0.121183515	946603	gatC	PTS system galactitol-specific enzyme IIC [b2092]
A_07_P003229	20.866348	14.572868	2.2003598	62.816353	0.3024869	-0.38507283	-1.1723447	1.9279368	946610	gatB	galactitol-specific enzyme IIB of phosphotransferase system [b2093]
A_07_P003233	25.91785	33.00348	5.702207	49.057026	-0.084228516	0.09477723	-0.49804688	0.8717735	946633	gatA	galactitol-specific enzyme IIA of phosphotransferase system [b2094]
A_07_P003236	23.589344	17.998486	3.6617663	63.908367	0.2652055	-0.29472005	-0.6517825	1.7385632	946641	gatZ	putative tagatose 6-phosphate kinase 1 [b2095]
A_07_P003244	65.480194	90.5897	14.336888	155.65015	-0.11212528	0.18649697	-0.5329165	1.1725395	946636	gatY	tagatose-bisphosphate aldolase 1 [b2096]
A_07_P003250	558.3643	361.5907	14.353659	497.8779	0.4498167	-0.34669924	-3.0613642	0.3198905	946632	fbaB	orf, hypothetical protein [b2097]
A_07_P003254	33.25939	26.745836	9.134122	55.05005	0.14354324	-0.34057057	0.04965496	0.9060135	946638	yegT	putative nucleoside permease protein [b2098]
A_07_P003256	425.2564	395.49295	287.74228	373.09268	-0.2385714	-0.5129192	0.96840775	-0.39188337	946630	yegU	orf, hypothetical protein [b2099]
A_07_P003265	90.32035	85.53368	19.26155	79.4011	0.29265666	0.044431925	-0.16613525	0.14225233	946637	yegV	putative kinase [b2100]
A_07_P003270	275.16235	329.35934	104.88604	354.8906	-0.2433865	-0.15367293	0.13568854	0.1591928	946639	yegW	putative transcriptional regulator [b2101]
A_07_P003271	58.776817	55.94979	53.913937	57.84576	-0.027877092	-0.26865792	1.6180699	-0.015424609	945543	yegX	orf, hypothetical protein [b2102]
A_07_P003278	65.56049	59.380043	228.723	52.99806	0.061217308	-0.2512982	3.634455	-0.21018219	946459	thiD	phosphomethylpyrimidine kinase [b2103]
A_07_P003284	72.55694	64.75647	322.2437	56.9021	-0.031077266	-0.36483288	3.8904243	-0.3462212	945142	thiM	hydoxyethylthiazole kinase [b2104]
A_07_P003289	103.283905	125.276184	108.76804	97.70621	-0.193519	-0.08468866	1.6516557	-0.23812425	947114	rcnR	orf, hypothetical protein [b2105]
A_07_P003293	55.128742	57.480976	66.17142	62.699486	-0.23484862	-0.34423482	1.7990904	-0.013710976	949078	rcnA	orf, hypothetical protein [b2106]
A_07_P003298	728.21405	659.6268	535.60315	420.08588	0.2978425	-0.014536619	1.6251798	-0.46034718	949080	yohN	orf, hypothetical protein [b2107]
A_07_P003304	21.963078	13.585876	13.443119	40.290623	-0.23771966	-1.1003582	0.8246037	0.6731328	946642	yehA	putative type-1 fimbrial protein [b2108]
A_07_P003310	26.162739	24.684427	13.874008	33.486107	-0.24297094	-0.49654973	0.6124354	0.14856577	946617	yehB	putative outer membrane protein [b2109]
A_07_P003315	23.45334	16.439184	8.94639	35.412933	0.0139817	-0.6683396	0.3941009	0.6439526	946621	yehC	putative chaperone [b2110]
A_07_P003318	459.5883	222.8931	19.523779	238.17581	1.2424526	0.028796911	-1.5440494	0.32962608	946619	yehD	putative fimbrial-like protein [b2111]
A_07_P003323	122.81909	115.99875	12.95459	262.4459	0.06010008	-0.19199193	-1.4143641	1.1910733	946615	yehE	orf, hypothetical protein [b2112]
A_07_P003330	2181.1318	2179.2424	372.74832	1215.8306	0.4220779	0.2511618	-0.35618997	-0.38556862	946627	mrp	putative ATPase [b2113]
A_07_P003331	1883.6951	2077.9807	263.3609	821.9051	0.548573	0.520524	-0.5193441	-0.6124613	946643	metG	methionine tRNA synthetase [b2114]
A_07_P003339	8.3292465	8.124466	4.7970405	5.6876116	-6.648302E-4	-0.20624411	0.973829	-0.51554			molybdate metabolism regulator, first fragment [b2115]
A_07_P003341	13.060088	12.537695	6.770136	12.394165	-0.03514552	-0.2637043	0.78748214	-0.07516086			molybdate metabolism regulator, second fragment 2 [b2116]
A_07_P003346	112.386246	140.7839	69.00321	153.67703	-0.27415347	-0.11880326	0.7926514	0.21277046			molybdate metabolism regulator, third fragment [b2117]
A_07_P003354	42.62595	37.26616	14.198937	76.296745	-0.11757815	-0.48111045	0.06700826	0.7577996	946649	yehI	putative regulator [b2118]
A_07_P003356	18.822514	14.691635	8.862315	48.40509	0.034524918	-0.49260592	0.71835625	1.4327126	946656	yehL	orf, hypothetical protein [b2119]
A_07_P003361	204.01624	342.66708	63.129326	291.72903	-0.15691662	0.42154038	-0.07868278	0.3945161	946651	yehM	orf, hypothetical protein [b2120]
A_07_P003369	432.50235	1096.8856	492.00974	815.20416	-1.0572481	0.11571932	0.89926624	-0.10730624	946652	yehP	orf, hypothetical protein [b2121]
A_07_P003374	48.20348	70.98248	21.319357	73.95651	-0.42302644	-0.034367085	0.17053539	0.23000157	946654	yehQ	orf, hypothetical protein [b2122]
A_07_P003377	46.062134	46.388554	29.005611	47.545113	-0.05058503	-0.21006393	1.0527009	0.030619144	949023	yehR	orf, hypothetical protein [b2123]
A_07_P003385	463.1125	518.7392	199.72003	413.26126	-0.09192467	-0.0979445	0.465227	-0.22074604	949026	yehS	orf, hypothetical protein [b2124]
A_07_P003390	322.84732	607.33044	83.50598	1011.31024	-0.20713902	0.5348244	-0.38750422	1.4756513	949024	yehT	orf, hypothetical protein [b2125]
A_07_P003391	1131.3984	2385.5247	541.5124	2302.926	-0.9707384	-0.06420541	-0.2632438	0.09011102	949027	yehU	putative 2-component sensor protein [b2126]
A_07_P003396	59.453922	57.672173	10.315905	285.75693	0.029459715	-0.18410349	-0.7269066	2.3298924	949029	mlrA	putative transcriptional regulator [b2127]
A_07_P003401	138.33994	144.31091	18.62321	177.97186	0.15091276	0.04220879	-0.9715955	0.5498326	949028	yehW	putative transport system permease protein [b2128]
A_07_P003406	85.74615	104.58861	8.245989	137.05325	-0.09908521	0.017830968	-1.706857	0.61299574	946659	yehX	putative ATP-binding component of a transport system [b2129]
A_07_P003412	80.694466	77.38873	11.990948	136.17682	0.044296622	-0.18571591	-0.9356921	0.83472407	946660	yehY	putative transport system permease protein [b2130]
A_07_P003416	276.88388	225.42699	59.333763	470.90134	0.20629966	-0.2599877	-0.24552083	1.0079315	946681	osmF	putative transport system permease protein [b2131]
A_07_P003421	1868.7736	1925.5394	392.08862	944.12775	0.29970407	0.17320895	-0.18260098	-0.64984536	946682	bglX	beta-D-glucoside glucohydrolase, periplasmic [b2132]
A_07_P003426	980.8626	1213.2004	88.15009	582.812	0.37229562	0.5093248	-1.3331857	-0.34323573	946653	dld	D-lactate dehydrogenase, FAD protein, NADH independent [b2133]
A_07_P003433	485.06082	466.63535	115.6742	319.8826	0.26664352	0.041107416	-0.030918717	-0.29849064	946662	pbpG	penicillin-binding protein 7 [b2134]
A_07_P003439	84.13679	40.09339	10.255129	334.1846	0.5675758	-0.6714629	-0.69828	2.5929005	946666	yohC	orf, hypothetical protein [b2135]
A_07_P003442	572.94446	627.1681	182.60637	581.03754	-3.9839745E-4	-0.039607048	0.12047911	0.0553267	946661	yohD	orf, hypothetical protein [b2136]
A_07_P003448	135.00478	128.26698	38.71619	201.49239	-0.08407855	-0.32760513	-0.11554432	0.52912486	949126	yohF	putative oxidoreductase [b2137]
A_07_P003454	34.458344	36.433674	23.527378	63.70315	-0.19005084	-0.27929795	1.0299716	0.73194873			putative channel/filament proteins [b2138]
A_07_P003459	70.148155	60.527344	40.56312	113.96399	-0.2980075	-0.6804917	0.68229115	0.4375819	949123	mdtQ	orf, hypothetical protein [b2139]
A_07_P003464	76.73605	63.423042	54.28821	47.77674	0.17571223	-0.26885188	1.4469817	-0.4723959	945458	dusC	putative regulator protein [b2140]
A_07_P003467	120.748474	118.333206	21.705547	70.17445	0.3478129	0.14899707	-0.35752052	-0.39968538	949127	yohJ	orf, hypothetical protein [b2141]
A_07_P003473	391.31494	357.53372	49.535313	70.05258	1.1174438	0.8175266	-0.09382141	-1.3288876	949125	yohK	putative seritonin transporter [b2142]
A_07_P003479	531.3569	647.9959	86.52881	618.39	0.062144518	0.17878199	-0.7857487	0.31646872	946663	cdd	cytidine/deoxycytidine deaminase [b2143]
A_07_P003484	228.48695	275.14053	155.20311	326.87976	-0.45308673	-0.35469735	0.75949395	0.09904957	949003	sanA	vancomycin sensitivity [b2144]
A_07_P003488	58.097916	70.90522	49.313553	113.20116	-0.6663449	-0.54860556	0.86768866	0.33147347	948983	yeiS	orf, hypothetical protein [b2145]
A_07_P003491	124.65565	61.82815	17.523064	352.68942	0.7318133	-0.4494648	-0.32827187	2.267752	949049	yeiT	putative oxidoreductase [b2146]
A_07_P003500	520.0666	391.10315	172.98677	1208.6962	-0.067943335	-0.6487577	0.11455643	1.1842275	949037	yeiA	putative oxidoreductase [b2147]
A_07_P003504	118.776146	434.7088	17.293835	395.8204	-0.82044756	0.8816904	-1.8298271	0.95164204	949039	mglC	methyl-galactoside transport and galactose taxis [b2148]
A_07_P003507	159.96013	800.73535	12.841649	990.55096	-0.94847465	1.2054722	-2.816749	1.7175324	949036	mglA	ATP-binding component of methyl-galactoside transport and galactose taxis [b2149]
A_07_P003515	219.12509	846.4509	20.437632	2694.738	-0.58438957	1.1956167	-2.236309	3.0714178	949041	mglB	galactose-binding transport protein; receptor for galactose taxis [b2150]
A_07_P003519	127.19222	964.9296	22.543959	1467.8485	-0.8320656	1.9216819	-1.5577275	2.732044	949043	galS	mgl repressor, galactose operon inducer [b2151]
A_07_P003525	128.1427	291.8764	58.15951	264.3635	-0.7828666	0.23507404	-0.1519947	0.2973932	949044	yeiB	orf, hypothetical protein [b2152]
A_07_P003527	3741.7026	7964.9194	1099.2054	5560.133	-0.38122296	0.53907657	-0.37792087	0.22569013	949040	folE	GTP cyclohydrolase I [b2153]
A_07_P003531	232.11853	356.4899	45.468212	528.56274	-0.084349155	0.36498427	-0.66574526	1.1383522	949045	yeiG	putative esterase [b2154]
A_07_P003540	185.61273	447.8703	56.467255	434.87494	-0.64761174	0.4535067	-0.5938854	0.6161814	949042	cirA	outer membrane receptor for iron-regulated colicin I receptor; porin; requires tonB gene product [b2155]
A_07_P003541	4594.47	2971.5947	551.9463	1819.854	0.998667	0.20033932	-0.28809667	-0.30192184	946667	lysP	lysine-specific permease [b2156]
A_07_P003546	417.27866	577.675	104.33353	469.32114	-0.07425833	0.22532177	-0.3035314	0.13079333	946657	yeiE	putative transcriptional regulator LYSR-type [b2157]
A_07_P003555	162.17651	162.55705	73.28902	115.18883	0.05010879	-0.11617601	0.6747489	-0.40796733	946668	yeiH	orf, hypothetical protein [b2158]
A_07_P003556	546.1506	691.6992	144.48006	365.48203	0.07765865	0.2488389	-0.0702337	-0.46635103	946669	nfo	endonuclease IV [b2159]
A_07_P003562	15.599532	15.951822	6.0887036	10.144249	0.1510042	0.013556242	0.5642438	-0.43434858	946640	yeiI	putative kinase [b2160]
A_07_P003568	100.183266	120.93875	47.69372	147.14503	-0.38683844	-0.28486955	0.31292653	0.20324779	946655	nupX	putative transport system permease protein [b2161]
A_07_P003571	145.10745	95.87734	17.614998	199.6731	0.33432102	-0.43320525	-0.9373891	0.8303269	946646	rihB	orf, hypothetical protein [b2162]
A_07_P003576	36.398647	35.955353	12.264707	161.52591	-0.15846133	-0.3458054	0.04270178	2.026836	946670	yeiL	putative transcriptional regulator [b2163]
A_07_P003581	11.969094	9.800569	6.4635906	11.796483	-0.21487117	-0.672914	0.6667581	-0.20034039	946671	yeiM	putative transport system permease protein [b2164]
A_07_P003589	47.201553	56.85775	9.837963	105.03539	-0.075155616	0.023701072	-0.5670229	1.1143017	946699	yeiN	orf, hypothetical protein [b2165]
A_07_P003591	916.5179	1454.774	276.31726	1160.4215	-0.20289207	0.29400158	-0.16219437	0.17301059	948725	cycA	transport of D-alanine, D-serine, and glycine [b4208]
A_07_P003600	27.61824	46.11696	17.99337	65.17303	-0.94185674	-0.3718469	0.21052265	0.33228517	948724	ytfE	orf, hypothetical protein [b4209]
A_07_P003602	25.720407	23.064318	10.236365	67.83461	-0.179201	-0.5061183	0.26212454	1.255395	948732	ytfF	putative transmembrane subunit [b4210]
A_07_P003606	125.795746	102.254776	31.80163	105.36352	0.1386435	-0.32993698	-0.07473123	-0.08157587	948731	ytfG	putative oxidoreductase [b4211]
A_07_P003611	132.41818	120.741325	58.761917	215.58241	-0.34977055	-0.65261817	0.24861717	0.3888563	948730	ytfH	orf, hypothetical protein [b4212]
A_07_P003616	562.1653	313.3321	46.172413	577.78345	0.42545843	-0.58751	-1.4098979	0.5004802	948729	cpdB	2:3-cyclic-nucleotide 2-phosphodiesterase [b4213]
A_07_P003624	730.5472	608.5715	107.81526	990.8496	0.21939802	-0.2138195	-0.77048254	0.6945739	948728	cysQ	affects pool of 3-phosphoadenosine-5-phosphosulfate in pathway of sulfite synthesis [b4214]
A_07_P003626	11.001129	5.7628484	5.5489397	8.990954	0.1735357	-0.928928	0.9567036	-0.08208156	948738	ytfI	orf, hypothetical protein [b4215]
A_07_P003634	139.90004	225.85425	88.60317	636.31177	-0.8927499	-0.37142038	0.21881914	1.3280752	948737	ytfJ	orf, hypothetical protein [b4216]
A_07_P003636	689.1739	433.18417	361.71	910.69	-0.18642187	-1.0259755	0.6540792	0.25115895	948736	ytfK	orf, hypothetical protein [b4217]
A_07_P003641	886.86755	841.0981	148.31259	560.2758	0.48540664	0.239295	-0.32413614	-0.14168692	948735	ytfL	putative transport protein [b4218]
A_07_P003647	515.4734	574.10724	87.95327	733.4771	0.04612136	0.031876564	-0.73443246	0.5904627	948734	msrA	peptide methionine sulfoxide reductase [b4219]
A_07_P003651	383.35184	432.9005	118.049286	345.0841	-0.0020618439	0.0036392212	0.069194436	-0.118293524	948733	ytfM	orf, hypothetical protein [b4220]
A_07_P003657	1372.9045	1138.7057	332.84042	663.4444	0.3781097	-0.061392546	0.104316354	-0.635586	948742	ytfN	orf, hypothetical protein [b4221]
A_07_P003664	1809.46	1235.5151	549.88184	1060.7858	0.3220358	-0.39807773	0.37420535	-0.41290164	948741	ytfP	orf, hypothetical protein [b4222]
A_07_P003668	71.640594	65.98383	40.367054	92.10244	-0.4293486	-0.71767974	0.51358783	-0.031398416			orf, hypothetical protein [b4223]
A_07_P003673	562.75195	640.9284	435.88828	520.5181	-0.14588976	-0.12789154	1.2561047	-0.22295284	948739	chpS	suppressor of inhibitory function of ChpB, PemI-like, autoregulated [b4224]
A_07_P003680	223.66316	317.2107	191.6056	254.22366	-0.24744403	0.08700335	1.2999035	-0.02718532	948747	chpB	probable growth inhibitor, PemK-like, autoregulated [b4225]
A_07_P003684	4077.2227	3206.9475	419.3074	1668.4385	0.84450865	0.3284564	-0.66646266	-0.40909147	948748	ppa	inorganic pyrophosphatase [b4226]
A_07_P003689	793.2731	1528.3091	125.05242	28055.078	-0.45818973	0.31818962	-1.3529394	4.721599	948746	ytfQ	putative LACI-type transcriptional regulator [b4227]
A_07_P003691	105.39023	193.77306	23.65574	1619.404	-0.24051857	0.46844208	-0.6254622	3.7366195	2847725	ytfR	putative ATP-binding component of a transport system [b4228]
A_07_P003696	1438.8208	1379.4453	659.25494	2176.4553	-0.30533528	-0.5358	0.33922243	0.32724762			putative ATP-binding component of a transport system [b4229]
A_07_P003703	57.213684	52.15356	12.385318	1036.0454	0.18043935	-0.12282145	-0.25675446	4.3945103	948743	ytfT	putative transport system permease protein [b4230]
A_07_P003709	80.05284	60.71073	26.87213	492.56946	-0.030998826	-0.59966636	0.16469455	2.6257923	948754	yjfF	putative transport system permease protein [b4231]
A_07_P003714	2382.7288	2749.467	324.00415	3800.5703	-0.007328272	0.02954197	-1.1153233	0.70176196	948753	fbp	fructose-bisphosphatase [b4232]
A_07_P003716	2990.8818	3208.769	1055.5585	1581.747	0.033949852	-0.034267426	0.30192065	-0.8496144	948752	mpl	putative ligase [b4233]
A_07_P003722	1445.0182	1590.8972	525.56366	759.4757	-0.0035533905	-0.034466982	0.30783153	-0.8960774	948751	yjgA	putative alpha helix protein [b4234]
A_07_P003729	2818.095	3454.4448	639.151	1802.6608	0.30079794	0.4248643	-0.069158316	-0.30830622	948750	pmbA	maturation of antibiotic MccB17, see tld genes [b4235]
A_07_P003731	2281.2383	1975.3207	478.8728	1587.205	0.41779876	0.04040289	-0.063768625	-0.070041895	948758	cybC	cytochrome b [b4236]
A_07_P003737	509.5696	269.80624	26.425953	585.6161	0.6354842	-0.4515369	-1.8632317	0.87164855	948757	nrdG	anaerobic ribonucleotide reductase activating protein [b4237]
A_07_P003742	1770.461	928.11273	51.819294	1019.95	1.0023632	-0.09905696	-2.3215938	0.24222398	948755	nrdD	anaerobic ribonucleoside-triphosphate reductase [b4238]
A_07_P003746	53.37377	64.27089	15.053469	81.29846	-0.022551179	0.07581687	-0.07805073	0.6200341	948762	treC	trehalase 6-P hydrolase [b4239]
A_07_P003751	105.04962	109.19257	44.806324	175.78978	-0.20096362	-0.31482673	0.3402748	0.57730424	948761	treB	PTS system enzyme II, trehalose specific [b4240]
A_07_P003760	643.98065	642.28265	300.2133	511.39825	0.1275878	-0.045888424	0.79709315	-0.16949463	948760	treR	repressor of treA,B,C [b4241]
A_07_P003761	158.81696	152.05539	111.01846	142.03992	-0.0266608	-0.2590953	1.227309	-0.15224099	948778	mgtA	Mg2+ transport ATPase, P-type 1 [b4242]
A_07_P003767	2563.6934	2778.3193	338.56653	1532.5369	0.3908813	0.3372028	-0.75929654	-0.31593347	948771	yjgF	orf, hypothetical protein [b4243]
A_07_P003774	1007.5741	1526.3907	72.66196	981.5579	0.050126314	0.47969842	-1.9728805	0.04787326	948763	pyrI	aspartate carbamoyltransferase, regulatory subunit [b4244]
A_07_P003778	1522.7708	1948.9792	121.713165	1463.6986	0.13851833	0.32487273	-1.7360876	0.11692643	948767	pyrB	aspartate carbamoyltransferase, catalytic subunit [b4245]
A_07_P003783	24.628002	22.880747	10.309911	53.428944	-0.21833801	-0.49417007	0.2959293	0.93447185			orf, hypothetical protein [b4247]
A_07_P003786	265.44708	211.08408	62.117065	338.61667	0.14040351	-0.35986948	-0.1844244	0.5271207	948769	yjgH	orf, hypothetical protein [b4248]
A_07_P003794	61.235767	59.64494	25.455334	105.9793	-0.20478725	-0.41242826	0.2993418	0.6220368	948765	yjgI	putative oxidoreductase [b4249]
A_07_P003799	48.529274	77.57655	24.461994	60.679096	-0.5184164	-0.011317253	0.26380587	-0.16058397			orf, hypothetical protein [b4250]
A_07_P003804	93.26466	162.79773	36.615623	108.63504	-0.35480762	0.279204	0.0668565	-0.09923267	948775	yjgJ	orf, hypothetical protein [b4251]
A_07_P003810	1083.7352	965.8377	191.30351	403.4999	0.63702273	0.30119705	-0.09451854	-0.75286126	948777	yjgK	orf, hypothetical protein [b4252]
A_07_P003811	7.1879354	5.051069	2.4660609	9.284161	-0.07358229	-0.7522373	0.15358412	0.3311	948776	yjgL	orf, hypothetical protein [b4253]
A_07_P003818	87.76907	156.54622	35.38012	194.32777	-0.7543305	-0.08919263	-0.29456913	0.42786527	948774	argI	ornithine carbamoyltransferase 1 [b4254]
A_07_P003824	562.6478	760.8868	267.91507	463.01086	-0.008336782	0.25744653	0.6917428	-0.2540338	948773	rraB	orf, hypothetical protein [b4255]
A_07_P003826	187.1131	203.99837	87.38733	130.73398	0.04615426	0.0011354685	0.71827555	-0.43563402	948772	yjgM	orf, hypothetical protein [b4256]
A_07_P003831	49.311386	41.897564	29.080486	49.708817	0.065294266	-0.33942664	1.07396	0.1123631	948784	yjgN	orf, hypothetical protein [b4257]
A_07_P003836	2305.7014	2633.0605	626.46497	1011.64856	0.020038843	0.041907787	-0.08932638	-1.1329713	948785	valS	valine tRNA synthetase [b4258]
A_07_P003845	1636.6941	1640.8789	305.61456	911.4308	0.38726473	0.22128296	-0.26319897	-0.4218266	948787	holC	DNA polymerase III, chi subunit [b4259]
A_07_P003848	476.36877	485.39505	187.68144	325.43375	-0.04165435	-0.18423915	0.38508832	-0.5558803	948791	pepA	aminopeptidase A/I [b4260]
A_07_P003851	710.5271	705.22455	300.67108	432.70422	0.04911399	-0.1313591	0.5789467	-0.6309056	948795	yjgP	orf, hypothetical protein [b4261]
A_07_P003856	529.3694	513.84314	201.57286	256.317	0.08944464	-0.12316847	0.46700644	-0.9214128	945324	yjgQ	orf, hypothetical protein [b4262]
A_07_P003863	673.4205	621.40967	57.089993	1622.4707	0.20971036	-0.075918674	-1.579952	1.5138121	948978	yjgR	orf, hypothetical protein [b4263]
A_07_P003866	22.351198	17.41929	11.683967	20.321177	0.0034555197	-0.5258771	0.8381689	-0.098424554	949058	idnR	L-idonate transcriptional regulator [b4264]
A_07_P003875	39.859196	26.576654	17.570045	37.10839	-0.013143301	-0.7675624	0.5755974	-0.08082247	948798	idnT	L-idonate transporter [b4265]
A_07_P003879	14.7830925	11.1666765	6.000052	13.830575	0.08377111	-0.49064302	0.5534058	0.023172617	947109	idnO	5-keto-D-gluconate 5-reductase [b4266]
A_07_P003883	12.704052	17.682014	8.298009	18.110397	-0.39635837	-0.089030504	0.7597257	0.15065897	944769	idnD	L-idonate dehydrogenase [b4267]
A_07_P003888	8.821335	4.488051	5.141961	12.146074	-0.13780785	-1.2823818	0.8540497	0.35910177	946066	idnK	gluconate kinase, thermosensitive glucokinase [b4268]
A_07_P003891	4222.9707	3475.5974	112.79682	3085.3796	0.45993304	0.00927043	-2.9959908	0.042611122	948802	yjgB	putative oxidoreductase [b4269]
A_07_P003900	28.470871	33.019245	14.590358	22.145523	-0.01340425	0.030749917	0.7926599	-0.3403877	948782	intB	prophage P4 integrase [b4271]
A_07_P003901	20.396866	17.22493	20.173475	15.56088	0.08867633	-0.32483923	1.843324	-0.26625943			orf, hypothetical protein [b4274]
A_07_P003910	21.359419	23.380194	9.993907	21.719383	-0.2017591	-0.2410109	0.4730246	-0.14216042	4056033	yjgX	orf, hypothetical protein [b4275]
A_07_P003912	13.614046	7.6118593	4.937737	10.083785	0.12540936	-0.88303185	0.4327706	-0.27216125			orf, hypothetical protein [b4276]
A_07_P003917	81.74937	119.2365	62.670647	160.46301	-0.6476891	-0.27280903	0.73942816	0.3607601	948804	yjgZ	orf, hypothetical protein [b4277]
A_07_P003924	6.129061	4.4742413	3.42762	7.4747767	-0.17207778	-0.79576695	0.7599988	0.14977467	948805	insG	IS4 hypothetical protein [b4278]
A_07_P003926	33.248344	32.61421	26.11599	29.643045	-0.024117708	-0.22156572	1.3980689	-0.15421796	948807	yjhB	putative transport protein [b4279]
A_07_P003931	37.40447	24.959435	27.787567	32.32018	0.17615163	-0.57713985	1.5179164	8.6414814E-4	948808	yjhC	putative dehydrogenase [b4280]
A_07_P003936	10.189347	4.434712	3.1689806	8.747127	0.2633586	-1.1064571	0.3489232	0.07866621	948809	yjhD	orf, hypothetical protein [b4281]
A_07_P003942	92.86927	99.39135	31.28049	227.1842	-0.14779532	-0.21954238	0.05280173	1.1782821	948810	yjhE	orf, hypothetical protein [b4282]
A_07_P003947	23.822401	23.506525	22.109818	25.214594	-0.12821877	-0.31714272	1.534685	-0.010790348			IS911 hypothetical protein [b4283]
A_07_P003953	544.39984	829.1339	267.03702	847.9182	-0.5227072	-0.08543539	0.22020125	0.15203881			putative transposase [b4285]
A_07_P003959	35.889957	25.344887	22.724272	63.25778	-0.18707764	-0.8586296	0.9241121	0.66607356	948818	yjhV	orf, hypothetical protein [b4286]
A_07_P003964	53.94326	58.013065	24.904562	65.69626	-0.2216425	-0.28637373	0.43386042	0.09821439	948819	fecE	ATP-binding component of citrate-dependent iron [b4287]
A_07_P003968	190.13684	187.7673	66.31857	284.34918	0.06057632	-0.12718236	0.3115579	0.6766894	946816	fecD	citrate-dependent iron transport, membrane-bound protein [b4288]
A_07_P003971	64.64831	93.76711	18.999481	108.76348	-0.16486931	0.20193446	-0.16098619	0.6211288	948826	fecC	citrate-dependent iron [b4289]
A_07_P003977	138.58578	246.50078	57.62029	134.6769	-0.39993572	0.26121056	0.10446918	-0.40572464	946838	fecB	citrate-dependent iron transport, periplasmic protein [b4290]
A_07_P003984	411.69373	656.1876	147.97444	343.4127	-0.22054243	0.2823279	0.07376957	-0.4466827	946427	fecA	outer membrane receptor; citrate-dependent iron transport, outer membrane receptor [b4291]
A_07_P003988	633.0406	2365.4392	93.13969	1071.7609	-0.29845142	1.4336209	-1.2927463	0.49664998	949104	fecR	regulator for fec operon, periplasmic [b4292]
A_07_P003994	228.61002	1022.9446	50.070198	452.1052	-0.52808523	1.4640169	-0.94841397	0.49117303	946839	fecI	probable RNA polymerase sigma factor [b4293]
A_07_P003998	1436.407	1555.4795	1259.9789	2182.596	-0.2068131	-0.261585	1.3746576	0.43225598	948830	insA	IS1 protein InsA [b4294]
A_07_P004004	448.6262	451.25543	219.43704	393.14648	-0.03613305	-0.19736934	0.7026949	-0.19109273	948827	yjhU	orf, hypothetical protein [b4295]
A_07_P004010	44.10262	46.376568	24.880373	110.787384	-0.479581	-0.5767157	0.4650985	0.88476443	949102	yjhF	putative transport system permease [b4296]
A_07_P004011	426.6519	559.72723	115.79913	351.77042	0.14292336	0.3649211	0.032023787	-0.10001421	946829	yjhG	putative dehydratase [b4297]
A_07_P004016	72.93342	101.81407	16.833065	198.53955	-0.13516402	0.17645526	-0.47991037	1.345099	948825	yjhH	putative lyase/synthase [b4298]
A_07_P004021	115.23933	148.78545	24.604984	507.48212	-0.12391567	0.075018525	-0.58099115	2.0502956	949100	yjhI	putative regulator [b4299]
A_07_P004028	120.52228	96.448074	36.93741	433.38324	-0.028418303	-0.51956046	0.035971522	1.8534131	946830	sgcR	putative DEOR-type transcriptional regulator [b4300]
A_07_P004033	77.87054	61.957848	17.906254	232.59268	0.19342339	-0.30603337	-0.15665478	1.8075681	948829	sgcE	putative epimerase [b4301]
A_07_P004040	109.376755	74.65964	28.47922	243.47606	0.03662169	-0.6839502	-0.13416743	1.2265836	948831	sgcA	putative PTS system enzyme II A component [b4302]
A_07_P004045	67.51586	65.32399	19.951458	289.85428	-0.039695024	-0.25697482	-0.027891576	2.0978224	948834	sgcQ	putative nucleoside triphosphatase [b4303]
A_07_P004046	60.43349	42.887558	9.963893	214.20161	0.3268882	-0.3375666	-0.5031432	2.1879253	946849	sgcC	putative PTS system enzyme IIC component [b4304]
A_07_P004054	106.704475	90.83648	17.100971	316.92984	0.15166473	-0.25027907	-0.7192705	1.7576954	948840	sgcX	putative lyase/synthase [b4305]
A_07_P004061	33.39812	76.83544	20.016823	165.85738	-1.0884935	-0.056154728	-0.05651164	1.2590991	949059	yjhQ	orf, hypothetical protein [b4307]
A_07_P004068	339.6445	547.6683	581.99426	428.50632	-0.47276902	0.046840668	2.0747457	-0.101989746	944740	yjhR	putative frameshift suppressor [b4308]
A_07_P004074	42.40746	37.468018	14.019872	67.32467	-0.15006542	-0.49838996	0.023625314	0.55224013	948835	yjhS	orf, hypothetical protein [b4309]
A_07_P004077	114.2323	114.64208	34.592346	165.82054	-0.036731243	-0.20123148	0.010358334	0.5364089	949106	nanM	orf, hypothetical protein [b4310]
A_07_P004083	54.193947	48.963963	32.654667	66.78088	-0.08218646	-0.398265	0.95750594	0.25460458	946843	nanC	orf, hypothetical protein [b4311]
A_07_P004086	29.377687	39.910397	70.34079	65.39625	-0.500273	-0.22789562	2.529903	0.68970203	948832	fimB	recombinase involved in phase variation; regulator for fimA [b4312]
A_07_P004095	207.23045	351.41275	504.3152	363.1374	-0.559764	0.032500148	2.4938607	0.28500295	948836	fimE	recombinase involved in phase variation; regulator for fimA [b4313]
A_07_P004096	89.43582	125.644	38.759697	119.72358	-0.28266442	0.038086534	0.28157532	0.17360604	948838	fimA	major type 1 subunit fimbrin [b4314]
A_07_P004101	42.850746	39.344967	21.296764	115.59619	-0.2885034	-0.5813112	0.47334576	1.178686	948841	fimI	fimbrial protein [b4315]
A_07_P004109	25.553482	26.266409	14.169468	79.40307	-0.78540456	-0.9153718	0.13439661	0.8857585	948843	fimC	periplasmic chaperone, required for type 1 fimbriae [b4316]
A_07_P004111	28.614775	24.996098	14.394257	63.89073	-0.37726378	-0.7419872	0.4020046	0.8170707	948844	fimD	outer membrane protein; export and assembly of type 1 fimbriae, interrupted [b4317]
A_07_P004120	47.696655	31.714005	22.312426	75.45133	-0.42646158	-1.1848956	0.24803364	0.27068555	948845	fimF	fimbrial morphology [b4318]
A_07_P004124	37.94532	27.30114	19.709202	59.10646	-0.29843426	-0.9430615	0.5270487	0.37644792	948846	fimG	fimbrial morphology [b4319]
A_07_P004128	44.027176	35.862755	20.087055	111.42069	-0.456748	-0.92232215	0.18165928	0.91829085	948847	fimH	minor fimbrial subunit, D-mannose specific adhesin [b4320]
A_07_P004131	80.54471	62.98246	14.168208	134.42883	0.2238921	-0.300614	-0.51270545	0.99836075	948848	gntP	gluconate transport system permease 3 [b4321]
A_07_P004138	132.26927	120.0316	65.56777	222.80293	-0.37067032	-0.6803999	0.38744557	0.4171083	947082	uxuA	mannonate hydrolase [b4322]
A_07_P004144	83.478004	76.84204	29.781818	110.25672	-0.10573304	-0.39489925	0.17783844	0.3311535	946795	uxuB	D-mannonate oxidoreductase [b4323]
A_07_P004150	249.2574	140.54489	102.418144	235.50648	0.075763345	-0.92050874	0.5631336	0.029380918	948849	uxuR	regulator for uxu operon [b4324]
A_07_P004152	125.03635	86.6798	73.239716	143.33272	0.08217347	-0.61607254	1.0810595	0.31468213	948850	yjiC	orf, hypothetical protein [b4325]
A_07_P004159	708.4813	600.3262	230.26279	489.306	0.24037552	-0.16827369	0.38946354	-0.25812817	948851	yjiD	orf, hypothetical protein [b4326]
A_07_P004165	93.03388	114.22592	36.76404	154.38243	-0.2111888	-0.08479297	0.21988559	0.5549797	948852	yjiE	putative transcriptional regulator LYSR-type [b4327]
A_07_P004170	938.244	908.15015	289.04245	382.4171	0.21921015	0.0025110245	0.29106343	-1.040118	948853	iadA	isoaspartyl dipeptidase [b4328]
A_07_P004174	1013.76196	942.92523	69.86709	244.14104	1.0646832	0.79051304	-1.0237436	-0.95376146	948854	yjiG	orf, hypothetical protein [b4329]
A_07_P004179	1205.106	776.5038	26.040665	244.046	1.5311034	0.7273426	-2.230611	-0.73734367	948856	yjiH	orf, hypothetical protein [b4330]
A_07_P004185	98.77675	136.41684	27.659248	127.65419	-0.20236814	0.093743205	-0.26824236	0.20311701	948858	kptA	orf, hypothetical protein [b4331]
A_07_P004190	15.514596	29.323275	10.793384	65.394585	-0.7312522	0.017501831	0.51580423	1.3797809	948859	yjiJ	putative transport protein [b4332]
A_07_P004194	311.06384	282.661	197.22025	269.85226	0.0013090372	-0.30649567	1.1144414	-0.16824389	948957	yjiK	orf, hypothetical protein [b4333]
A_07_P004196	166.38606	360.6759	44.316055	523.8443	-0.2545849	0.6919173	-0.3926829	1.4355061	948837	yjiL	putative enzyme [b4334]
A_07_P004201	73.360245	166.85875	15.378602	294.72043	-0.17079926	0.845091	-0.6543382	1.8709645	945789	yjiM	orf, hypothetical protein [b4335]
A_07_P004207	109.02658	126.31396	25.522648	220.41325	-0.03600967	0.006657839	-0.36030436	1.0150096	948860	yjiN	orf, hypothetical protein [b4336]
A_07_P004214	113.92877	96.96527	22.252756	270.23444	0.1871748	-0.2150836	-0.39836597	1.4687426	948861	mdtM	putative transport protein [b4337]
A_07_P004217	20.504372	17.500069	7.8699713	26.762478	-0.19300282	-0.5912399	0.19603199	0.22676611	948866	yjiP	orf, hypothetical protein [b4338]
A_07_P004222	24.07877	15.8945465	11.71321	24.318035	-0.029735923	-0.798632	0.70117444	0.020017505	948866	yjiP	orf, hypothetical protein [b4339]
A_07_P004227	4547.085	11235.548	856.6445	5188.2524	-0.066245556	1.0691442	-0.7038839	0.15954852	945068	gpmA	phosphoglyceromutase 1 [b0755]
A_07_P004231	1149.8657	1198.864	162.8375	1323.7821	0.03729582	-0.0721674	-1.0121291	0.2759843	944943	galM	galactose-1-epimerase [b0756]
A_07_P004240	1310.6777	1107.1227	145.47775	1246.6495	0.15848017	-0.25468397	-1.2424272	0.121711254	945358	galK	galactokinase [b0757]
A_07_P004241	294.9461	380.7327	41.07209	341.81894	-0.097415924	0.101245165	-1.1711016	0.1508534	945357	galT	galactose-1-phosphate uridylyltransferase [b0758]
A_07_P004246	589.33484	723.38654	124.121346	629.2278	8.428097E-4	0.12685585	-0.47595835	0.13082528	945354	galE	UDP-galactose-4-epimerase [b0759]
A_07_P004252	604.89325	1416.2247	37.073208	393.47174	0.36546278	1.4230947	-1.8922331	-0.21946931	945368	modF	ATP-binding component of molybdate transport system [b0760]
A_07_P004260	583.73157	778.182	186.32512	523.16534	-0.061389446	0.18374681	0.06166315	-0.18393946	945366	modE	molybdate uptake regulatory protein [b0761]
A_07_P004262	737.3701	501.06598	186.3598	575.6771	0.2979064	-0.42914748	0.084144354	-0.023734331	945365	ybhT	orf, hypothetical protein [b0762]
A_07_P004270	2965.9937	3357.494	54.029655	1671.0566	0.3359871	0.34518957	-3.6720972	-0.45627904	945364	modA	molybdate-binding periplasmic protein; permease [b0763]
A_07_P004275	2781.4248	4020.515	127.24235	1980.0978	0.2668841	0.6287744	-2.412754	-0.18788028	945361	modB	molybdate transport permease protein [b0764]
A_07_P004279	1165.2804	1768.5216	66.28465	797.5763	0.092084885	0.5242851	-2.2732382	-0.41940975	945362	modC	ATP-binding component of molybdate transport [b0765]
A_07_P004285	145.93834	129.39784	56.52393	81.21811	0.17761886	-0.16559291	0.57972884	-0.6323788	945372	ybhA	putative phosphatase [b0766]
A_07_P004288	1309.6063	1580.9974	225.21117	803.3141	0.27920723	0.381243	-0.4900403	-0.39040136	946398	pgl	putative isomerase [b0767]
A_07_P004293	35.49861	27.596651	16.600447	45.11706	-0.16822255	-0.7011583	0.50577235	0.21317625	944869	ybhD	putative transcriptional regulator LYSR-type [b0768]
A_07_P004296	21.485857	15.741892	10.117683	41.50921	-0.062969565	-0.68141425	0.62105775	0.9225626	945375	ybhH	orf, hypothetical protein [b0769]
A_07_P004302	303.93472	247.67441	186.05632	280.24072	-0.06707263	-0.5320548	0.99544084	-0.14867902	945377	ybhI	putative membrane pump protein [b0770]
A_07_P004308	558.2639	402.56186	230.28304	315.65402	0.08763051	-0.5537721	0.58062756	-0.69948375	945380	ybhJ	putative enzyme [b0771]
A_07_P004315	334.0565	362.44717	109.66116	182.7642	0.076907635	0.024919748	0.24040318	-0.7577127	945381	ybhC	putative pectinesterase [b0772]
A_07_P004319	1331.4885	851.87225	108.69488	731.21246	0.8410187	0.02702117	-1.0031298	0.011829615	945383	ybhB	orf, hypothetical protein [b0773]
A_07_P004325	25.330492	25.107382	7.9046783	28.248245	0.11097026	-0.07145977	0.20140946	0.30374432	945376	bioA	7,8-diaminopelargonic acid synthetase [b0774]
A_07_P004326	40.094692	29.912935	11.480709	70.74048	0.0642283	-0.52808	0.030564249	0.91884124	945370	bioB	biotin synthesis, sulfur insertion? [b0775]
A_07_P004331	30.127651	22.624605	7.023548	64.09005	0.1211015	-0.46176028	-0.20917904	1.2456021	945384	bioF	8-amino-7-oxononanoate synthase [b0776]
A_07_P004340	40.40113	41.008118	21.091839	78.90234	-0.112906694	-0.2610582	0.71991867	0.8882549	945388	bioC	biotin biosynthesis; reaction prior to pimeloyl CoA [b0777]
A_07_P004343	112.57525	144.79135	40.949257	115.49667	-0.126508	0.066912055	0.18504739	-0.054057717	945387	bioD	dethiobiotin synthetase [b0778]
A_07_P004347	370.84677	263.0213	203.72394	261.5825	0.19785452	-0.4674554	1.1041819	-0.27021492	945385	uvrB	DNA repair; excision nuclease subunit B [b0779]
A_07_P004351	144.31978	153.36456	88.6283	142.53085	-0.043079495	-0.12505019	1.0240257	-0.025586843	945390	ybhK	putative structural protein [b0780]
A_07_P004360	774.3719	293.29	157.03978	344.715	0.8364334	-0.7339319	0.30507243	-0.2957008	945392	moaA	molybdopterin biosynthesis, protein A [b0781]
A_07_P004361	1092.5402	447.6344	237.3331	592.9393	0.62741256	-0.82954764	0.1952467	-0.21882963	945396	moaB	molybdopterin biosynthesis, protein B [b0782]
A_07_P004368	748.76514	340.6131	195.394	470.76346	0.37084007	-0.9352057	0.20324838	-0.2631824	945397	moaC	molybdopterin biosynthesis, protein C [b0783]
A_07_P004375	1291.4644	859.7726	433.43167	956.7496	0.22249198	-0.53415513	0.4178958	-0.17481446	945398	moaD	molybdopterin biosynthesis [b0784]
A_07_P004379	798.6911	358.75818	178.96603	433.03217	0.5907862	-0.7335055	0.20336974	-0.25688934	945399	moaE	molybdopterin converting factor, subunit 2 [b0785]
A_07_P004381	1320.2194	1480.5208	162.465	1127.1948	0.07304168	0.06870222	-1.1790003	-0.11951208	945401	ybhL	orf, hypothetical protein [b0786]
A_07_P004387	26.043997	27.022865	16.6218	42.708588	-0.41068566	-0.527122	0.7119752	0.3383776	949001	ybhM	orf, hypothetical protein [b0787]
A_07_P004392	89.664055	137.4312	37.68454	187.35135	-0.47376966	-0.027328134	0.046209097	0.624863	945410	ybhN	orf, hypothetical protein [b0788]
A_07_P004398	114.26077	121.17822	9.064782	207.59557	-0.016226888	-0.10109317	-1.9016061	0.88070595	945409	ybhO	putative synthetase [b0789]
A_07_P004404	174.39964	150.71295	16.439167	260.21677	0.080489516	-0.29977	-1.5561631	0.69329464	945408	ybhP	orf, hypothetical protein [b0790]
A_07_P004406	698.74756	350.47156	216.99866	1158.6096	-0.10731721	-1.2724583	-0.023867726	0.6577225	945405	ybhQ	orf, hypothetical protein [b0791]
A_07_P004412	233.7218	236.8928	38.719353	191.74397	0.17086256	0.02063787	-0.6522682	-0.079260945	945403	ybhR	orf, hypothetical protein [b0792]
A_07_P004418	511.8521	504.61765	175.85121	550.9967	-0.019797325	-0.21000028	0.20936608	0.12200785	945411	ybhS	orf, hypothetical protein [b0793]
A_07_P004422	788.32477	706.9099	107.706055	1037.977	0.155051	-0.17187929	-0.94610465	0.58745193	945413	ybhF	putative ATP-binding component of a transport system [b0794]
A_07_P004426	343.97067	269.00113	78.31203	506.21295	0.19869518	-0.32564414	-0.1657486	0.79164314	945414	ybhG	putative membrane protein [b0795]
A_07_P004432	328.25803	273.77658	79.88709	452.96582	0.1515553	-0.27994227	-0.1167053	0.65161467	945421	ybiH	putative transcriptional regulator [b0796]
A_07_P004438	5382.1777	8509.728	1011.6579	1018.2948	0.29816794	0.7894249	-0.34276557	-2.068379	945425	rhlE	putative ATP-dependent RNA helicase [b0797]
A_07_P004442	26.332697	18.126122	16.132713	23.094069	9.0157986E-4	-0.70755017	1.0645704	-0.15294325	945426	ybiA	orf, hypothetical protein [b0798]
A_07_P004448	12104.615	12316.995	3039.6326	5832.4824	0.2256496	0.081076145	0.0025963783	-0.792238	945431	dinG	probably ATP-dependent helicase [b0799]
A_07_P004455	1490.3083	1283.6316	246.93175	1376.3083	0.14644003	-0.23860455	-0.6764505	0.06712127	945424	ybiB	putative enzyme [b0800]
A_07_P004457	935.1876	817.4847	164.28358	576.96704	0.53837705	0.17464685	-0.20015502	-0.12290192	945412	ybiC	putative dehydrogenase [b0801]
A_07_P004463	563.184	566.6083	170.76656	262.5988	0.06608677	-0.09483409	0.11504161	-0.99917126	945433	ybiJ	orf, hypothetical protein [b0802]
A_07_P004466	1122.0897	464.69485	422.0348	1774.4646	-0.15446568	-1.5959647	0.20531487	0.5422175	945434	ybiI	orf, hypothetical protein [b0803]
A_07_P004475	65.946815	111.63401	21.95225	119.306206	-0.2004224	0.38931334	-0.016821265	0.69035995	947502	ybiX	putative enzyme [b0804]
A_07_P004476	22.427841	15.052637	10.195762	20.723574	0.13595068	-0.6089901	0.769165	0.05742097	946246	fiu	putative outer membrane receptor for iron transport [b0805]
A_07_P004484	105.26188	83.04421	17.888372	173.19524	0.28738618	-0.22431159	-0.49896705	1.041291	947523	ybiM	orf, hypothetical protein [b0806]
A_07_P004487	84.42627	94.43319	87.74256	75.9003	-0.11608958	-0.12415433	1.710031	-0.23418772	944938	rlmF	orf, hypothetical protein [b0807]
A_07_P004491	94.25956	132.40465	31.976295	106.76194	-0.28291643	0.03766024	-0.07201719	-0.06774199	945935	ybiO	putative transport protein [b0808]
A_07_P004500	3109.709	5475.0933	144.57335	2109.3425	0.3407836	0.9872215	-2.3155866	-0.18371344	945435	glnQ	ATP-binding component of glutamine high-affinity transport system [b0809]
A_07_P004503	5510.9717	9926.904	179.01845	4599.5513	0.13922167	0.8185916	-3.0343695	-0.086103916	945621	glnP	glutamine high-affinity transport system; membrane component [b0810]
A_07_P004510	7992.567	10979.606	240.34615	7359.311	0.10151744	0.38994622	-3.1834204	0.017917633	944872	glnH	periplasmic glutamine-binding protein; permease [b0811]
A_07_P004515	9769.831	11627.649	995.3741	17205.377	-0.11601186	-0.034523726	-1.6405001	0.7359297	945101	dps	global regulator, starvation conditions [b0812]
A_07_P004518	109.24488	138.60031	64.38364	65.41663	-0.03793943	0.135759	0.9697963	-0.7422874	947045	rhtA	putative transmembrane subunit [b0813]
A_07_P004524	13808.502	16616.045	4225.998	4009.1506	-0.006063938	0.091290236	0.056278467	-1.7547646	944967	ompX	outer membrane protein X [b0814]
A_07_P004528	403.14426	1136.9457	269.13257	421.91232	-0.7168038	0.6093259	0.47075284	-0.615669	945360	ybiP	putative enzyme [b0815]
A_07_P004533	152.17273	238.45331	77.3001	224.86441	-0.5017384	-0.023407578	0.2916293	0.09709525	945436	yliL	orf, hypothetical protein [b0816]
A_07_P004536	360.46115	355.67572	205.512	288.16544	0.046248913	-0.14269948	1.0061628	-0.24120986	945437	mntR	putative toxin [b0817]
A_07_P004542	419.8885	432.74887	188.96428	385.79688	-0.03701353	-0.1631558	0.58162904	-0.12369013	945438	ybiR	orf, hypothetical protein [b0818]
A_07_P004547	2270.5342	2190.411	514.91626	1052.0032	0.33361506	0.11211848	-0.03647089	-0.7407887	945441	ybiS	orf, hypothetical protein [b0819]
A_07_P004555	569.4326	741.6504	187.44264	256.98526	0.008116722	0.21966434	0.17557597	-1.1042346	945440	ybiT	putative ATP-binding component of a transport system [b0820]
A_07_P004556	3.1507256	3.1383302	2.7832208	3.0757062	-0.1861316	-0.361485	1.4054751	-0.1854099	945439	ybiU	orf, hypothetical protein [b0821]
A_07_P004564	455.70636	480.64526	120.33079	296.4177	0.22237945	0.12958121	0.07181585	-0.36260498	945432	ybiV	orf, hypothetical protein [b0822]
A_07_P004566	272.7181	419.79578	94.6259	361.90564	-0.537809	-0.085197926	-0.2943765	-0.094117284	945444	ybiW	putative formate acetyltransferase [b0823]
A_07_P004573	31.274412	25.070753	8.442491	69.867874	0.20712447	-0.28151906	0.08841789	1.4022592	945445	ybiY	putative pyruvate formate-lyase 2 activating enzyme [b0824]
A_07_P004579	72.78808	56.783062	16.389597	47.981327	0.39125013	-0.13665807	0.010863423	-0.17449093	945449	fsaA	putative transaldolase [b0825]
A_07_P004583	154.57379	128.97952	63.93545	100.1991	0.20613098	-0.22468865	0.70305836	-0.38380742	945452	moeB	molybdopterin biosynthesis [b0826]
A_07_P004586	746.2278	784.72437	242.8267	449.5512	0.12491846	0.02782154	0.2757647	-0.57072425	945454	moeA	molybdopterin biosynthesis [b0827]
A_07_P004591	496.1432	551.3198	114.14893	489.67813	0.11646414	0.09892988	-0.23284078	0.13302827	945456	iaaA	putative asparaginase [b0828]
A_07_P004599	355.5967	379.53183	77.6987	438.52173	-0.010187149	-0.08587527	-0.43393135	0.32770705	945457	gsiA	putative ATP-binding component of a transport system [b0829]
A_07_P004603	251.03058	296.87088	68.44661	269.7187	-0.085451484	-0.01314497	-0.18972814	0.05362892	945459	gsiB	putative transport protein [b0830]
A_07_P004610	472.13596	483.4622	73.38433	355.592	0.33925962	0.20379353	-0.5758631	-0.034231186	945460	gsiC	putative transport system permease protein [b0831]
A_07_P004614	208.80988	220.50323	81.88087	269.73154	-0.11779046	-0.20884633	0.30215347	0.28703296	945461	gsiD	putative transport system permease protein [b0832]
A_07_P004620	104.535904	149.13023	55.352642	101.12979	-0.21525764	0.1276505	0.63800347	-0.22755992	945462	yliE	orf, hypothetical protein [b0833]
A_07_P004622	52.648773	51.408844	28.701103	46.196625	0.013433337	-0.19061601	0.9086758	-0.13969052	945463	yliF	orf, hypothetical protein [b0834]
A_07_P004626	605.4689	695.7907	132.09805	390.56293	0.28958297	0.32051778	-0.13632512	-0.30742645	945465	yliG	orf, hypothetical protein [b0835]
A_07_P004631	3410.5198	1577.1113	125.162125	11417.062	0.57943225	-0.70294046	-2.4181535	2.358049	945466	bssR	putative receptor [b0836]
A_07_P004637	167.01163	92.1159	25.562637	354.7121	0.46756876	-0.56052375	-0.46973586	1.5897574	945467	yliI	putative dehydrogenase [b0837]
A_07_P004644	458.63867	447.97156	137.30988	360.6964	0.07435727	-0.12926006	0.10497022	-0.23672748	945469	yliJ	putative transferase [b0838]
A_07_P004647	774.88806	573.4374	179.16945	1224.145	0.20073295	-0.4032848	-0.14139473	0.89593554	945455	dacC	D-alanyl-D-alanine carboxypeptidase; penicillin-binding protein 6 [b0839]
A_07_P004651	525.149	456.5859	115.79638	515.4598	0.08427286	-0.28723288	-0.32632768	0.092894554	945453	deoR	transcriptional repressor for deo operon, tsx, nupG [b0840]
A_07_P004660	290.91617	264.82227	126.617165	172.8768	0.06652498	-0.23872149	0.6369287	-0.64884686	945450	ybjG	orf, hypothetical protein [b0841]
A_07_P004661	422.1916	576.16174	234.26178	359.00443	-0.00655818	0.2723527	0.914202	-0.20496535	945448	cmr	proton motive force efflux pump [b0842]
A_07_P004670	140.63676	195.88298	56.729637	163.07378	-0.34562004	-0.037268043	0.11511636	-0.09658027	945447	ybjH	orf, hypothetical protein [b0843]
A_07_P004674	194.53844	350.38354	63.0548	247.96405	-0.27082992	0.40838408	-0.12567091	0.11473453	945470	ybjI	orf, hypothetical protein [b0844]
A_07_P004677	304.496	420.89865	145.3439	377.53928	-0.32943988	-0.03205681	0.37414265	0.016251802	945471	ybjJ	putative DEOR-type transcriptional regulator [b0845]
A_07_P004684	83.408195	109.78595	49.7541	105.59878	-0.25291348	-0.026147246	0.7722485	0.122906804	945473	ybjK	putative DEOR-type transcriptional regulator [b0846]
A_07_P004688	357.8903	404.56262	116.77681	224.56085	-0.002411127	0.0047688484	0.15236115	-0.6393336	945474	ybjL	putative transport protein [b0847]
A_07_P004692	1217.5139	1215.8113	651.7178	511.778	0.042693853	-0.1289916	0.91161036	-1.1721656	945477	ybjM	orf, hypothetical protein [b0848]
A_07_P004696	297.74347	894.8783	343.50168	1491.0928	-1.7464786	-0.32852316	0.23030412	0.61323833	945479	grxA	glutaredoxin1 redox coenzyme for glutathione-dependent ribonucleotide reductase [b0849]
A_07_P004701	1791.0526	1789.229	449.32394	1042.3157	0.259228	0.08809137	0.0347836	-0.4862995	945481	ybjC	orf, hypothetical protein [b0850]
A_07_P004708	217.49123	181.4916	70.68228	175.9501	0.13169622	-0.29902458	0.2806952	-0.13860643	945483	nfsA	modulator of drug activity A [b0851]
A_07_P004711	310.97852	317.69458	113.887245	265.1095	0.07049346	-0.068347216	0.3918203	-0.12424493	945484	rimK	ribosomal protein S6 modification protein [b0852]
A_07_P004718	2788.6748	2106.113	870.33826	2250.5837	0.12042761	-0.45423603	0.21103096	-0.15336394	945482	ybjN	putative sensory transduction regulator [b0853]
A_07_P004724	17.720255	15.374353	3.9733417	17.996796	0.10841286	-0.26612687	-0.2780261	0.16624212	945480	potF	periplasmic putrescine-binding protein; permease protein [b0854]
A_07_P004730	126.53249	350.8399	20.174023	258.6994	-0.5314044	0.7702334	-1.4098066	0.5358521	945476	potG	ATP-binding component of putrescine transport system [b0855]
A_07_P004732	71.37975	194.64835	15.059124	122.9021	-0.31622112	0.9613961	-0.7905624	0.50319004	945475	potH	putrescine transport protein; permease [b0856]
A_07_P004740	120.5134	268.43658	32.328835	152.31332	-0.11291695	0.8728045	-0.240682	0.26041925	945485	potI	putrescine transport protein; permease [b0857]
A_07_P004742	266.37747	299.914	158.75508	300.8039	-0.18726623	-0.18585658	0.83659935	0.023572206	945488	ybjO	orf, hypothetical protein [b0858]
A_07_P004749	123.74662	109.97019	69.07712	149.14009	-0.06944811	-0.40939128	0.85997784	0.23531878	947260	rumB	putative enzyme [b0859]
A_07_P004751	129.72647	535.8889	50.1462	435.35785	-1.2015954	0.67519903	-0.8023206	0.5806222	948981	artJ	arginine 3rd transport system periplasmic binding protein [b0860]
A_07_P004759	707.70105	986.9718	83.30777	346.7034	0.4985628	0.80876493	-0.8175187	-0.49538696	949066	artM	arginine 3rd transport system permease protein [b0861]
A_07_P004761	505.948	770.8469	84.57465	435.8249	-0.0025157928	0.4352734	-0.81267226	-0.18226743	949046	artQ	arginine 3rd transport system permease protein [b0862]
A_07_P004766	1199.9867	1403.3494	147.34413	1166.3978	0.04176283	0.097952604	-1.213458	0.03629303	948988	artI	arginine 3rd transport system periplasmic binding protein [b0863]
A_07_P004773	2549.199	3769.8665	412.2719	3450.3208	-0.14498973	0.24981308	-1.0028296	0.3271854	945489	artP	ATP-binding component of 3rd arginine transport system [b0864]
A_07_P004777	3019.7812	2173.1116	258.21606	3298.982	0.10818076	-0.53616786	-1.6690775	0.27124548	945491	ybjP	putative enzyme [b0865]
A_07_P004784	673.9014	570.1117	153.65398	765.4903	0.20628405	-0.20467544	-0.15603316	0.4256177	945493	ybjQ	orf, hypothetical protein [b0866]
A_07_P004789	323.0623	335.69373	84.72213	494.6607	-0.0023245811	-0.116657734	-0.16279113	0.64779043	945494	amiD	putative regulator [b0867]
A_07_P004791	212.42674	273.36896	145.59758	266.32623	-0.2842567	-0.09003866	0.9412998	0.07746041	945495	ybjS	putative nucleotide di-P-sugar epimerase or dehydratase [b0868]
A_07_P004800	178.1894	166.08124	50.129032	118.011055	0.1760143	-0.09517455	0.116856575	-0.38298678	945496	ybjT	putative dTDP-glucose enzyme [b0869]
A_07_P004805	785.45404	676.784	130.62764	432.53638	0.5483494	0.16385221	-0.26918125	-0.27686787	944955	ltaE	putative arylsulfatase [b0870]
A_07_P004806	127.03064	109.696434	41.933556	118.21554	0.16325605	-0.21806991	0.3347925	0.09498751	946132	poxB	pyruvate oxidase [b0871]
A_07_P004813	169.65277	194.76915	74.48629	168.25076	-0.25257087	-0.22305751	0.33042657	-0.22905493	947660	hcr	putative enzyme [b0872]
A_07_P004816	47.71608	36.274586	17.538853	74.29073	-0.04595864	-0.61114156	0.28065562	0.6282358	946592	hcp	putative prismane [b0873]
A_07_P004824	579.6143	711.14264	207.91954	435.9932	-0.06558418	0.05979514	0.22588277	-0.4408846	947142	ybjE	putative surface protein [b0874]
A_07_P004830	621.881	203.1493	169.01703	346.69217	0.56345725	-1.2203065	0.45452332	-0.24403739	945497	aqpZ	transmembrane water channel; aquaporin Z [b0875]
A_07_P004834	155.48073	148.20523	44.091484	174.00961	0.017235875	-0.22157013	-0.030392528	0.21515536	945498	ybjD	orf, hypothetical protein [b0876]
A_07_P004839	262.78528	181.58519	42.520836	66.66792	0.79364955	0.09074557	-0.06345713	-1.1496818	946025	ybjX	putative enzyme [b0877]
A_07_P004841	199.48872	259.19186	67.059326	173.12988	-0.09630406	0.11174297	0.10143435	-0.26526833	947322	macA	putative membrane protein [b0878]
A_07_P004848	107.82623	131.85161	29.347485	79.956535	0.047123075	0.16766357	-0.059741378	-0.34880984	945164	macB	putative ATP-binding component of a transport system [b0879]
A_07_P004854	2053.7358	1163.5762	153.96637	6485.607	0.595474	-0.39387774	-1.3715549	2.289953	945669	cspD	cold shock protein [b0880]
A_07_P004856	591.85297	1054.212	126.8743	497.15237	-0.030791521	0.63239765	-0.4820944	-0.24685311	948443	clpS	orf, hypothetical protein [b0881]
A_07_P004862	2213.442	2620.456	505.34235	2786.447	-0.038714886	0.035146236	-0.39913678	0.3289094	945764	clpA	ATP-binding component of serine protease [b0882]
A_07_P004869	6072.7744	6187.8823	2739.3115	2363.884	0.043373823	-0.09920406	0.66536736	-1.282335	945500	infA	protein chain initiation factor IF-1 [b0884]
A_07_P004874	484.54678	514.27264	209.97519	513.1425	-0.040020227	-0.12378812	0.52409863	0.078191996	945490	aat	leucyl, phenylalanyl-tRNA-protein transferase [b0885]
A_07_P004879	336.05005	472.04047	111.2338	188.61429	-0.022139788	0.29842877	0.15331507	-0.8198886	945504	cydC	ATP-binding component of cytochrome-related transport [b0886]
A_07_P004881	553.0496	565.1236	144.94792	364.3141	0.2542174	0.11570835	0.092877746	-0.31252074	949052	cydD	ATP-binding component of cytochrome-related transport, Zn sensitive [b0887]
A_07_P004888	19.487547	10.792349	8.774495	14.642954	0.15133011	-0.87087953	0.7707012	-0.22552764	949054	trxB	thioredoxin reductase [b0888]
A_07_P004893	2609.6436	3177.9268	451.89963	1163.8031	0.33902192	0.45358825	-0.42022133	-0.7904954	949051	lrp	regulator for leucine [b0889]
A_07_P004899	1511.5654	1716.1022	672.5152	456.391	-0.008932352	0.0044927597	0.59319854	-1.7011461	945102	ftsK	cell division protein [b0890]
A_07_P004904	3656.1587	3055.0366	1249.6222	1013.2367	0.3150971	-0.11370778	0.5367956	-1.5007722	948989	lolA	periplasmic protein effects translocation of lipoproteins from inner membrane to outer [b0891]
A_07_P004906	1418.9769	1699.3511	572.21735	631.331	-0.046746016	0.043720722	0.41357446	-1.1796398	945505	rarA	putative polynucleotide enzyme [b0892]
A_07_P004911	12264.615	8978.575	959.7007	6916.6763	0.75312066	0.13351154	-1.1521165	-0.03774166	945506	serS	serine tRNA synthetase; also charges selenocystein tRNA with serine [b0893]
A_07_P004916	178.24995	109.52446	8.860122	124.91127	0.5266882	-0.3456267	-2.0332074	0.049178123	945508	dmsA	anaerobic dimethyl sulfoxide reductase subunit A [b0894]
A_07_P004924	436.2639	336.08182	26.932007	366.8947	0.34305167	-0.20300353	-1.9042202	0.12870431	945507	dmsB	anaerobic dimethyl sulfoxide reductase subunit B [b0895]
A_07_P004926	653.28174	517.72485	68.69525	361.06665	0.83192015	0.32673454	-0.64696693	0.011967897	945502	dmsC	anaerobic dimethyl sulfoxide reductase subunit C [b0896]
A_07_P004935	3005.5264	1146.1624	76.49597	6305.6313	0.8281555	-0.73231673	-2.6973991	1.9326668	945512	ycaC	orf, hypothetical protein [b0897]
A_07_P004939	623.5963	650.6967	141.54199	423.75317	0.24460459	0.13631153	-0.12424207	-0.2772951	945515	ycaD	putative transport [b0898]
A_07_P004945	4.0273075	6.4972615	2.5762935	4.346386	-0.5462016	-0.025851727	0.57981527	-0.4007126	945518	ycaM	putative transport [b0899]
A_07_P004950	8.533179	5.061969	2.8798745	10.072652	-0.018061042	-0.94111204	0.18539715	0.25671542	945523	ycaN	putative transcriptional regulator LYSR-type [b0900]
A_07_P004952	9.669286	6.6784196	5.391968	11.994882	-0.23997068	-0.9435394	0.68796766	0.106455326	945520	ycaK	orf, hypothetical protein [b0901]
A_07_P004958	2246.1162	1643.3397	610.6791	1567.886	0.27006578	-0.35040307	0.16165447	-0.21305847	945517	pflA	pyruvate formate lyase activating enzyme 1 [b0902]
A_07_P004961	16526.746	9612.981	386.6399	1366.4155	2.214859	1.2634463	-1.4322727	-1.3459868	945514	pflB	formate acetyltransferase 1 [b0903]
A_07_P004969	5091.376	3608.1064	412.5838	806.71234	1.1787865	0.512306	-0.67597437	-1.4436541	945513	focA	probable formate transporter [b0904]
A_07_P004973	496.08316	855.22205	172.38849	214.21945	-0.056574583	0.5594766	0.18904328	-1.2325786	945509	ycaO	orf, hypothetical protein [b0905]
A_07_P004976	68.99317	64.32995	15.628582	137.20395	0.12107921	-0.14955008	-0.25065207	1.1483637	945525	ycaP	orf, hypothetical protein [b0906]
A_07_P004981	2491.2363	2724.0784	168.35123	696.417	0.97684026	0.9360802	-1.1399395	-0.8265102	945527	serC	3-phosphoserine aminotransferase [b0907]
A_07_P004990	12.403078	11.088982	6.8502955	10.030618	0.0017158985	-0.3295213	0.9157917	-0.2690835	945528	aroA	5-enolpyruvylshikimate-3-phosphate synthetase [b0908]
A_07_P004992	30.770412	23.499596	40.268963	57.46356	-0.49328148	-1.0518557	1.6653786	0.44331026	945534	ycaL	putative heat shock protein [b0909]
A_07_P004996	12328.35	12033.7295	3994.7673	4324.0024	0.040901423	-0.16366148	0.18564057	-1.4351506	945535	cmk	cytidylate kinase [b0910]
A_07_P005002	21801.256	19953.408	3080.2056	5845.1694	0.77658606	0.4791429	-0.276191	-1.0870206	945536	rpsA	30S ribosomal subunit protein S1 [b0911]
A_07_P005009	2794.244	1751.7637	588.42554	2284.7004	0.42357826	-0.41973853	-0.053413153	0.16861367	945533	ihfB	integration host factor [b0912]
A_07_P005013	5.4520392	4.981635	4.30864	15.257045	-0.5418503	-0.84169304	0.88912165	0.9782454	945531	ycaI	orf, hypothetical protein [b0913]
A_07_P005017	1960.2902	2330.752	795.4623	895.141	0.06447029	0.1445334	0.53380466	-1.0309212	945530	msbA	ATP-binding transport protein; multicopy suppressor of htrB [b0914]
A_07_P005022	349.67435	523.84705	153.64914	228.36948	-0.121647835	0.29182005	0.4625157	-0.70080173	945526	lpxK	putative EC 1.2 enzyme [b0915]
A_07_P005026	164.59148	243.92181	67.6074	153.59685	-0.21058404	0.18727934	0.27631497	-0.27483737	945524	ycaQ	orf, hypothetical protein [b0916]
A_07_P005035	360.9743	362.11932	82.592834	238.14581	0.30478644	0.13968897	-0.052486658	-0.2597767	945537	ycaR	orf, hypothetical protein [b0917]
A_07_P005040	2542.5315	2821.814	687.9259	1433.9479	0.051130056	0.031820297	-0.0642755	-0.7396548	945539	kdsB	CTP:CMP-3-deoxy-D-manno-octulosonate transferase [b0918]
A_07_P005042	335.5706	398.61444	43.88439	457.97488	-0.016714096	0.061997294	-1.1810147	0.46742654	945545	ycbJ	orf, hypothetical protein [b0919]
A_07_P005049	94.01363	89.800514	38.97816	100.36535	-0.0935936	-0.32940626	0.4067377	0.03621435	945546	ycbC	orf, hypothetical protein [b0920]
A_07_P005053	981.9551	1179.8063	460.74054	855.4584	-0.082520485	0.012634754	0.5963125	-0.24599195	945547	smtA	S-adenosylmethionine-dependent methyltransferase [b0921]
A_07_P005056	890.94965	1022.808	316.0687	619.0657	-0.01752019	0.011932611	0.2579099	-0.5072839	945548	mukF	mukF protein [b0922]
A_07_P005064	586.70294	662.2237	242.20053	345.70355	-0.016928434	-0.011907101	0.47717905	-0.74453473	945550	mukE	orf, hypothetical protein [b0923]
A_07_P005066	1281.2756	1683.174	354.26758	524.233	0.0074272156	0.23136425	-0.076707125	-1.2463853	945549	mukB	kinesin-like cell division protein involved in chromosome partitioning [b0924]
A_07_P005073	2224.3782	1892.4216	440.56635	2452.7156	0.18403053	-0.21880388	-0.3814044	0.36049604	945541	ycbB	putative amidase [b0925]
A_07_P005076	1554.1228	2051.1106	497.31082	1898.8524	-0.16576862	0.064870834	-0.03911376	0.15874696	945538	ycbK	orf, hypothetical protein [b0926]
A_07_P005083	834.57666	844.8913	225.38995	772.2316	0.05149913	-0.100445986	-0.06658697	-0.025024176	945551	ycbL	orf, hypothetical protein [b0927]
A_07_P005088	6035.061	9166.433	448.83768	4652.6406	0.14808035	0.58140516	-1.8304875	-0.19175124	945553	aspC	aspartate aminotransferase [b0928]
A_07_P005092	23651.154	45769.035	1639.0869	31904.547	-0.41075706	0.37203932	-2.4911673	0.05658269	945554	ompF	outer membrane protein 1a [b0929]
A_07_P005096	1596.239	1133.4435	250.53796	862.1225	0.8338969	0.17026663	-0.06714237	-0.019326925	945555	asnS	asparagine tRNA synthetase [b0930]
A_07_P005105	1630.1831	1467.0415	446.54504	591.02295	0.1849525	-0.13683891	0.087331295	-1.2433081	946648	pncB	nicotinate phosphoribosyltransferase [b0931]
A_07_P005106	2084.3682	1916.5411	303.46536	973.3025	0.65670013	0.3659289	-0.35277045	-0.4064622	947253	pepN	aminopeptidase N [b0932]
A_07_P005114	33.35307	29.855913	13.731565	49.937515	-0.022815347	-0.35228395	0.46739691	0.5949774	947220	ssuB	putative ATP-binding component of a transport system [b0933]
A_07_P005118	105.05917	97.07295	39.52661	164.1837	-0.08521438	-0.36894166	0.27501512	0.5943823	947216	ssuC	putative transport system permease protein [b0934]
A_07_P005122	33.287598	20.88655	9.258966	44.058853	0.12129581	-0.7207813	0.045769393	0.56123126	945557	ssuD	orf, hypothetical protein [b0935]
A_07_P005130	15.629811	13.105056	4.8989897	36.62303	0.04689896	-0.37694407	0.14369059	1.310838	945560	ssuA	orf, hypothetical protein [b0936]
A_07_P005134	220.77415	183.61684	148.95934	172.15527	0.0796442	-0.35589468	1.2825273	-0.24372864	945947	ssuE	orf, hypothetical protein [b0937]
A_07_P005137	9.017602	7.533505	8.495604	12.372528	-0.45221484	-0.8813038	1.2322931	0.039597988	948306	ycbQ	putative fimbrial-like protein [b0938]
A_07_P005145	27.425976	17.688738	13.687532	22.648853	0.06936991	-0.73300815	0.8372249	-0.17124665	946773	ycbR	putative chaperone [b0939]
A_07_P005146	15.918777	10.707916	8.587696	11.0508795	-0.012492895	-0.75421107	0.867656	-0.5035733	946934	ycbS	putative outer membrane protein [b0940]
A_07_P005153	22.111002	16.08973	12.375111	19.037498	0.11804378	-0.5102471	1.0512562	-0.06238866	947185	ycbT	homolog of Salmonella FimH protein [b0941]
A_07_P005160	18.968126	12.646959	5.6059403	11.465278	0.10689616	-0.6475569	0.118882656	-0.58392143	945561	ycbU	putative fimbrial-like protein [b0942]
A_07_P005162	14.404625	5.802883	7.2632356	18.059576	0.03433442	-1.4470223	0.81702197	0.39605474	945562	ycbV	putative fimbrial-like protein [b0943]
A_07_P005167	88.60314	133.14116	91.37721	117.43892	-0.67835605	-0.26049578	1.1366552	-0.2363869	945559	ycbF	putative chaperone [b0944]
A_07_P005175	1231.4147	1395.1616	204.19562	693.8924	0.46001053	0.4704597	-0.3617469	-0.3320346	945556	pyrD	dihydro-orotate dehydrogenase [b0945]
A_07_P005180	179.00969	329.9161	76.27441	550.9333	-0.6450459	0.06734991	-0.10527682	1.0122819	945552	ycbW	orf, hypothetical protein [b0946]
A_07_P005181	139.671	187.169	47.29458	98.93054	-0.059546947	0.1930952	0.1487019	-0.52160394	945563	ycbX	orf, hypothetical protein [b0947]
A_07_P005186	1357.2343	1381.4144	381.03055	625.3528	0.12638521	-0.017804384	0.06422949	-0.9560554	945564	rlmL	putative oxidoreductase [b0948]
A_07_P005192	507.86972	488.3602	126.90097	159.06764	0.23725867	0.011079788	0.007038951	-1.4020711	945566	uup	putative ATP-binding component of a transport system [b0949]
A_07_P005197	749.5208	747.9751	339.4479	554.37244	0.08772445	-0.084920645	0.71548176	-0.3118999	944999	pqiA	paraquat-inducible protein A [b0950]
A_07_P005203	1804.6733	1705.2892	307.34775	867.1069	0.6079211	0.356534	-0.17533767	-0.41404676	945653	pqiB	paraquat-inducible protein B [b0951]
A_07_P005209	754.9643	786.8473	179.59937	425.6327	0.2605691	0.15057898	-0.040521026	-0.5307412	946972	ymbA	orf, hypothetical protein [b0952]
A_07_P005212	1593.9066	1349.4396	149.28513	3570.5825	0.21097374	-0.19889903	-1.4349153	1.4100547	945567	rmf	ribosome modulation factor [b0953]
A_07_P005216	659.88367	899.92773	243.83492	398.32312	-0.038317204	0.23961306	0.29591107	-0.7311015	945568	fabA	beta-hydroxydecanoyl thioester dehydrase, trans-2-decenoyl-ACP isomerase [b0954]
A_07_P005221	961.09424	1323.4296	291.12067	713.3645	-0.031008005	0.26085758	0.016466856	-0.42555785	945569	ycbZ	putative ATP-dependent protease [b0955]
A_07_P005226	524.6001	568.16925	179.3268	374.25116	0.019611597	-0.03495145	0.24152029	-0.4321108	945570	ycbG	putative dehydrogenase [b0956]
A_07_P005234	98449.43	145146.67	17333.506	67298.48	0.20004106	0.5904305	-0.53524375	-0.3132813	945571	ompA	outer membrane protein 3a [b0957]
A_07_P005240	3217.9858	2130.0085	2995.5356	1376.6414	0.50772333	-0.2572415	2.1749153	-0.6817939	947335	sulA	suppressor of lon; inhibits cell division and ftsZ ring formation [b0958]
A_07_P005243	173.187	194.233	56.447514	207.80467	-0.08117247	-0.08538091	0.07201433	0.21721327	946504	sxy	orf, hypothetical protein [b0959]
A_07_P005250	296.17502	339.27673	94.87625	206.03949	0.090847015	0.11719382	0.21905196	-0.39719307	947001	yccS	orf, hypothetical protein [b0960]
A_07_P005253	203.98267	195.95363	68.34868	160.37627	0.075581074	-0.15201962	0.26865494	-0.23591685	945594	yccF	orf, hypothetical protein [b0961]
A_07_P005259	2452.6492	2224.4753	1996.861	2133.5554	-0.026691675	-0.3372333	1.447237	-0.19228458	946227	helD	DNA helicase IV [b0962]
A_07_P005264	1521.9576	1657.0295	161.82954	1722.2777	0.12584496	0.07885003	-1.3370004	0.33972263	945574	mgsA	methylglyoxal synthase [b0963]
A_07_P005268	58.291374	65.37849	19.189144	203.85481	-0.20834875	-0.21248126	-0.04080546	1.633327	945577	yccT	orf, hypothetical protein [b0964]
A_07_P005271	1356.8055	1262.2698	203.27591	1114.9414	0.26118374	-0.012676716	-0.7069838	0.013426065	949008	yccU	orf, hypothetical protein [b0965]
A_07_P005278	738.3402	419.22537	726.1927	630.6332	0.06046343	-0.9257617	1.8070664	-0.13153219	945578	hspQ	orf, hypothetical protein [b0966]
A_07_P005282	1484.8076	1891.0847	583.1962	871.8959	-0.05926895	0.12000394	0.3630433	-0.79182863	946691	yccW	putative oxidoreductase [b0967]
A_07_P005289	495.4736	459.91772	118.84863	728.4013	0.055751085	-0.22134757	-0.23339617	0.6471648	945304	yccX	orf, hypothetical protein [b0968]
A_07_P005292	93.51685	81.92098	44.38947	56.984215	0.16062796	-0.2000314	0.8561543	-0.5185479	945023	yccK	putative sulfite reductase [b0969]
A_07_P005300	2792.713	2598.245	1147.8767	2008.4138	0.19566035	-0.07813525	0.68349576	-0.24446249	946016	yccA	putative carrier/transport protein [b0970]
A_07_P005301	842.9956	794.7595	10.79123	1647.8018	0.23088098	-0.023792744	-4.2861776	1.2333145	945579	hyaA	hydrogenase-1 small subunit [b0972]
A_07_P005310	506.40204	441.82715	12.974539	761.89087	0.20815134	-0.15831566	-3.307841	0.8329406	945580	hyaB	hydrogenase-1 large subunit [b0973]
A_07_P005313	773.8914	765.7661	18.07999	867.73474	0.19411659	0.009223223	-3.4550128	0.3947277	945581	hyaC	probable Ni/Fe-hydrogenase 1 b-type cytochrome subunit [b0974]
A_07_P005317	1444.3898	1488.3866	18.54858	1798.1312	0.095867634	-0.030508995	-4.4166045	0.4473939	945575	hyaD	processing of HyaA and HyaB proteins [b0975]
A_07_P005323	660.1328	763.6652	38.430676	710.40875	0.067595005	0.10811257	-2.264296	0.2089765	945573	hyaE	processing of HyaA and HyaB proteins [b0976]
A_07_P005328	474.21756	628.4725	14.972993	558.27057	-0.1105454	0.1260891	-3.3251243	0.16035819	945572	hyaF	nickel incorporation into hydrogenase-1 proteins [b0977]
A_07_P005333	507.7368	503.3673	15.269485	399.10776	0.36849785	0.1863625	-2.9163237	0.056684494	945585	appC	probable third cytochrome oxidase, subunit I [b0978]
A_07_P005337	1145.8268	1128.02	29.159033	702.7521	0.5556247	0.3633623	-2.970142	-0.11418867	947547	appB	probable third cytochrome oxidase, subunit II [b0979]
A_07_P005341	296.20166	274.95416	43.356422	205.3493	0.46880198	0.19174695	-0.5329248	-0.024209738	946206	appA	phosphoanhydride phosphorylase; pH 2.5 acid phosphatase; periplasmic [b0980]
A_07_P005350	34.951412	23.317986	16.251726	20.970133	0.42205286	-0.33152056	1.087831	-0.27947342	947409	etk	orf, hypothetical protein [b0981]
A_07_P005355	24.739037	26.17124	11.455258	28.280054	-0.36146247	-0.44993567	0.29829407	-0.13297832	945236	etp	putative phosphatase [b0982]
A_07_P005356	12.600715	9.708518	7.842285	14.0907	-0.11564517	-0.6614939	0.9707307	0.081080675	945586	gfcE	putative function in exopolysaccharide production [b0983]
A_07_P005364	498.7772	552.79596	557.09753	403.46548	0.020519018	-7.956028E-4	1.950589	-0.24994302	945588	gfcD	orf, hypothetical protein [b0984]
A_07_P005368	11.590299	8.788095	5.3476562	8.979369	0.0118101835	-0.5571517	0.6664065	-0.32093346	944978	gfcC	orf, hypothetical protein [b0985]
A_07_P005371	12.215556	11.857234	5.7883782	9.794541	0.0059765577	-0.2066418	0.6990235	-0.2772051	949118	gfcB	putative regulator [b0986]
A_07_P005379	377.73825	278.01273	334.53006	281.82816	0.047414064	-0.56448686	1.6426989	-0.33966887	945029	gfcA	orf, hypothetical protein [b0987]
A_07_P005381	997.3803	1172.9049	1187.6444	995.8703	-0.09618425	-0.0319798	1.9262393	-0.06288171	945009	insB	IS1 protein InsB [b0988]
A_07_P005389	38.73465	101.10319	156.0669	59.782307	-0.7976272	0.41683865	2.9833763	-0.13604486	945590	cspH	cold shock-like protein [b0989]
A_07_P005392	9022.418	37932.914	11370.703	2954.5364	-1.0045662	0.89763165	1.0997043	-2.57966	945591	cspG	homolog of Salmonella cold shock protein [b0990]
A_07_P005396	17.021017	17.653385	9.509721	42.89092	-0.4365785	-0.55361724	0.49411452	0.9322647	948207	dgoK	2-oxo-3-deoxygalactonate kinase [b3693]
A_07_P005403	120.36555	130.83327	33.160896	142.0228	0.015894532	-0.03346455	-0.073437214	0.2900827			putative FADA-type transcriptional regulator [b3694]
A_07_P005410	67.37144	73.11013	15.676053	96.34663	0.03747344	-0.014258862	-0.2955659	0.5890589			regulator protein for dgo operon [b3695]
A_07_P005415	9.058817	9.300047	5.3552237	9.465221	-0.13764894	-0.2694	0.8745109	-0.038847208	948202	yidX	putative replicase EC 2.7.- [b3696]
A_07_P005417	315.9256	412.3324	172.64143	272.477	-0.11588669	0.09867096	0.7828424	-0.29384828	948204	yidA	orf, hypothetical protein [b3697]
A_07_P005425	394.9229	171.08202	70.74595	450.13287	0.4175613	-0.95898783	-0.29275453	0.64182997	948212	yidB	orf, hypothetical protein [b3698]
A_07_P005429	1011.33295	1148.8416	240.1943	511.27792	0.21838021	0.23263454	-0.08506954	-0.7302108	948211	gyrB	DNA gyrase subunit B, type II topoisomerase, ATPase activity [b3699]
A_07_P005432	752.7567	1040.0211	199.51682	389.8724	0.10946965	0.40616012	-0.035668015	-0.8042245	948209	recF	ssDNA and dsDNA binding, ATP binding [b3700]
A_07_P005436	1317.2241	1176.1627	285.60907	696.4322	0.4469676	0.11388874	0.012115955	-0.43699026	948218	dnaN	DNA polymerase III, beta-subunit [b3701]
A_07_P005441	1585.8856	1458.809	373.3172	940.22455	0.34460616	0.05444312	0.028327703	-0.37411618	948217	dnaA	DNA biosynthesis; initiation of chromosome replication; can be transcription regulator [b3702]
A_07_P005448	5381.107	9274.301	2539.4255	3837.7827	-0.23683238	0.37883663	0.45030212	-0.68897414	948215	rnpA	RNase P, protein component; protein C5; processes tRNA, 4.5S RNA [b3704]
A_07_P005451	9638.096	15604.98	3098.8743	5426.4473	-0.08326864	0.44225097	0.050262928	-0.8765209	948214	yidC	60 KD inner-membrane protein [b3705]
A_07_P005456	929.8057	802.12756	464.10483	741.13776	-0.15900445	-0.54176855	0.6090524	-0.45070362	948222	mnmE	GTP-binding protein in thiophene and furan oxidation [b3706]
A_07_P005461	48.646378	34.15178	16.358322	3406.329	-0.101519585	-0.78155696	0.096708655	6.06371	948221	tnaA	tryptophanase [b3708]
A_07_P005466	23.074749	17.8477	9.241652	187.0609	-0.3231207	-0.86336374	0.12732232	2.7314885	948220	tnaB	low affinity tryptophan permease [b3709]
A_07_P005475	120.65915	140.04082	56.19977	186.73116	-0.20914304	-0.1638993	0.45909107	0.45637047	948219	mdtL	putative transport protein [b3710]
A_07_P005476	110.91558	156.66724	66.91747	179.22145	-0.42868543	-0.10011041	0.6128428	0.2990842	948227	yidZ	putative transcriptional regulator LYSR-type [b3711]
A_07_P005482	462.92426	677.116	168.06102	480.5595	-0.17446399	0.20449615	0.1342802	-0.08503723	948226	yieE	orf, hypothetical protein [b3712]
A_07_P005486	1066.6198	1016.4084	217.99536	1069.7825	0.14588356	-0.09334803	-0.37425768	0.1856432	948225	yieF	orf, hypothetical protein [b3713]
A_07_P005491	1490.1902	1986.0898	170.23868	577.6101	0.6090069	0.85377455	-0.7503228	-0.7228339	948224	yieG	putative membrane / transport protein [b3714]
A_07_P005498	330.51398	323.05246	62.652775	186.18513	0.42029667	0.21768796	-0.20842886	-0.37218845	948232	yieH	putative phosphatase [b3715]
A_07_P005504	110.83844	136.09668	75.65355	132.54669	-0.19704282	-0.07053542	1.0225141	0.09648728	948231	cbrB	orf, hypothetical protein [b3716]
A_07_P005510	64.04622	70.68936	36.112133	86.411316	-0.2184335	-0.24571955	0.72547257	0.2491616	948230	cbrC	orf, hypothetical protein [b3717]
A_07_P005514	30.53466	32.63259	17.683376	63.31997	-0.7365545	-0.81035495	0.24592704	0.3511467	948229	yieK	putative isomerase [b3718]
A_07_P005519	93.29636	102.650764	56.18068	126.61064	-0.45481753	-0.48663223	0.583971	0.021176457	948272	yieL	putative xylanase [b3719]
A_07_P005525	26.50403	29.476145	14.725656	45.925167	-0.32580805	-0.3421383	0.59684753	0.50275326	948228	bglH	putative receptor protein [b3720]
A_07_P005527	37.868996	62.69317	19.785828	66.42747	-0.6126337	-0.05500889	0.22135216	0.2336179	948234	bglB	phospho-beta-glucosidase B; cryptic [b3721]
A_07_P005531	26.84122	24.492033	8.486244	64.309586	0.036945105	-0.26485884	0.14622831	1.3330165	948236	bglF	PTS system beta-glucosides, enzyme II, cryptic [b3722]
A_07_P005540	6.8759418	5.4241724	3.6341677	8.556863	-0.04550898	-0.55732954	0.80509436	0.30550385	948235	bglG	positive regulation of bgl operon [b3723]
A_07_P005542	1041.3226	1346.3577	941.6446	1070.7871	-0.13627744	0.0647006	1.489095	-0.060534716	948233	phoU	negative regulator for pho regulon and putative enzyme in phosphate metabolism [b3724]
A_07_P005550	465.19275	504.08188	451.0944	481.59558	-0.15871	-0.21254683	1.5674255	-0.0732286	948240	pstB	ATP-binding component of high-affinity phosphate-specific transport system [b3725]
A_07_P005555	555.36206	578.8917	592.38605	589.725	-0.19076848	-0.30056953	1.6728764	-0.06866622	948239	pstA	high-affinity phosphate-specific transport system [b3726]
A_07_P005556	424.64514	451.41296	357.6725	588.4675	-0.38533926	-0.46681476	1.1375778	0.12085414	948238	pstC	high-affinity phosphate-specific transport system, cytoplasmic membrane component [b3727]
A_07_P005561	629.91656	311.99982	810.65424	699.7427	-0.026045322	-1.2093261	2.1084166	0.1611073	948237	pstS	high-affinity phosphate-specific transport system; periplasmic phosphate-binding protein [b3728]
A_07_P005566	1315.7891	1438.5165	533.49146	671.2814	0.010588884	-0.030424118	0.47873306	-0.92486167	948241	glmS	L-glutamine:D-fructose-6-phosphate aminotransferase [b3729]
A_07_P005571	2587.9312	5020.0024	1021.19604	2856.6267	-0.3411839	0.4450395	0.08781314	-0.16318202	948246	glmU	N-acetyl glucosamine-1-phosphate uridyltransferase [b3730]
A_07_P005580	24965.742	29727.988	4907.653	9433.18	0.3262899	0.40849566	-0.25002003	-1.0423563	948245	atpC	membrane-bound ATP synthase, F1 sector, epsilon-subunit [b3731]
A_07_P005582	11953.268	16782.932	2175.2888	4408.839	0.33004546	0.64996815	-0.3575461	-1.073401	948244	atpD	membrane-bound ATP synthase, F1 sector, beta-subunit [b3732]
A_07_P005587	6204.627	8643.576	768.22205	2674.8716	0.51481366	0.823431	-0.7283993	-0.66357255	948243	atpG	membrane-bound ATP synthase, F1 sector, gamma-subunit [b3733]
A_07_P005591	45272.27	51350.625	4486.582	20844.674	0.53764606	0.54973245	-1.0267575	-0.5458152	948242	atpA	membrane-bound ATP synthase, F1 sector, alpha-subunit [b3734]
A_07_P005596	13363.522	14489.293	1674.5442	6394.895	0.46104884	0.4080689	-0.7648761	-0.56677103	948254	atpH	membrane-bound ATP synthase, F1 sector, delta-subunit [b3735]
A_07_P005604	825.02576	674.42773	128.56264	345.9031	0.5996041	0.1391623	-0.31182826	-0.61897945	948247	atpF	membrane-bound ATP synthase, F0 sector, subunit b [b3736]
A_07_P005607	30866.81	32649.45	6687.059	16482.92	0.30470324	0.21603966	-0.13137364	-0.56489277	948253	atpE	membrane-bound ATP synthase, F0 sector, subunit c [b3737]
A_07_P005614	8289.925	7542.8135	2091.5662	5202.161	0.23384356	-0.07207894	0.017603397	-0.40291595	948252	atpB	membrane-bound ATP synthase, F0 sector, subunit a [b3738]
A_07_P005616	2478.105	2146.7378	1398.201	1590.0172	0.059926033	-0.31683183	1.0047963	-0.54478073	948251	atpI	membrane-bound ATP synthase, dispensable protein, affects expression of atpB [b3739]
A_07_P005623	5570.3564	7796.587	2278.8389	2821.0547	-0.09256554	0.22284126	0.38849998	-1.0386117	948250	gidB	glucose-inhibited division; chromosome replication? [b3740]
A_07_P005627	844.2939	1210.8177	367.2492	451.30795	-0.11865926	0.23183894	0.45089006	-0.986804	948248	mnmG	glucose-inhibited division; chromosome replication? [b3741]
A_07_P005634	490.99927	588.11835	359.42044	311.90744	0.011994362	0.10271287	1.3324807	-0.60712075	948249	mioC	initiation of chromosome replication [b3742]
A_07_P005636	486.1349	355.95844	347.56918	276.45483	0.33680654	-0.28250742	1.6232861	-0.4420179	948259	asnC	regulator for asnA, asnC and gidA [b3743]
A_07_P005641	1530.6709	5079.929	1710.8579	586.0545	-0.8254018	0.73557544	1.1056893	-2.1749718	948258	asnA	asparagine synthetase A [b3744]
A_07_P005646	412.54288	286.35333	44.463608	290.61768	0.55890775	-0.13750553	-0.88440406	0.088974714	948257	viaA	orf, hypothetical protein [b3745]
A_07_P005654	245.99251	198.22462	43.208202	149.19215	0.5960399	0.114895344	-0.14266205	-0.08991504	948256	ravA	putative 2-component regulator [b3746]
A_07_P005658	462.92795	274.32928	97.75701	285.00705	0.5406625	-0.38388288	0.06768191	-0.12363994	948255	kup	low affinity potassium transport system [b3747]
A_07_P005662	269.8947	294.03525	31.579752	923.0814	7.311106E-4	-0.045342565	-1.3240583	1.8102806	948267	rbsD	D-ribose high-affinity transport system; membrane-associated protein [b3748]
A_07_P005669	45.49667	91.84047	14.511384	253.5412	-0.38467157	0.45903134	-0.26271188	2.1292045	948264	rbsA	ATP-binding component of D-ribose high-affinity transport system [b3749]
A_07_P005671	1100.9084	1598.2451	112.04154	2721.6448	-0.16658974	0.20153832	-1.6926429	1.1746824	948262	rbsC	D-ribose high-affinity transport system [b3750]
A_07_P005677	8323.865	13122.251	373.3621	19624.396	-0.23723936	0.24978375	-2.94531	1.0355716	948261	rbsB	D-ribose periplasmic binding protein [b3751]
A_07_P005685	499.34528	856.5023	158.31535	1313.3064	-0.41890192	0.18985152	-0.30560255	1.0116799	948260	rbsK	ribokinase [b3752]
A_07_P005686	319.48596	631.54846	133.98755	980.1911	-0.60734224	0.20613217	-0.09046018	1.0454569	948266	rbsR	regulator for rbs operon [b3753]
A_07_P005693	150.98657	189.12212	84.71737	280.1909	-0.5288966	-0.37366486	0.40794873	0.39858186	948265	hsrA	putative transport protein [b3754]
A_07_P005698	938.5343	1278.548	228.8511	586.473	0.18327522	0.45963478	-0.082188725	-0.4595816	948263	yieP	orf, hypothetical protein [b3755]
A_07_P005705	416.32455	505.76242	176.07948	464.25946	-0.15411544	-0.043031454	0.37493765	0.038594723			orf, hypothetical protein [b3762]
A_07_P005708	263.1147	268.49872	87.9032	258.09338	-0.019790292	-0.16023207	0.16904151	-0.012100339			regulator of pssA [b3763]
A_07_P005711	1019.31036	876.61456	607.2116	656.12946	0.19118237	-0.19606376	1.2143953	-0.40887094	948274	yifE	orf, hypothetical protein [b3764]
A_07_P005720	124.510864	156.50183	246.7291	312.38718	-0.68248904	-0.52224684	2.0747032	0.68006265	948282	yifB	putative 2-component regulator [b3765]
A_07_P005722	831.83875	715.9675	104.584015	215.56146	0.95519495	0.56911874	-0.26591086	-0.9575213			acetolactate synthase II, large subunit, cryptic, interrupted [b3767]
A_07_P005727	2465.0964	2195.5935	145.91963	467.53632	1.3442852	1.0075862	-0.9635776	-1.0187206	948279	ilvM	acetolactate synthase II, valine insensitive, small subunit [b3769]
A_07_P005731	5488.693	6438.878	202.60844	1021.90576	1.2183442	1.2790246	-1.7708166	-1.1713676	948278	ilvE	branched-chain amino-acid aminotransferase [b3770]
A_07_P005736	788.4916	1262.6528	31.021067	136.94775	1.0721309	1.5817552	-1.8251092	-1.417851	948277	ilvD	dihydroxyacid dehydratase [b3771]
A_07_P005741	1873.6124	3347.2139	80.39112	314.77222	1.1835904	1.8510635	-1.5885165	-1.354363	948287	ilvA	threonine deaminase [b3772]
A_07_P005750	205.98843	247.61908	83.03038	251.32355	-0.18384087	-0.087947845	0.27584267	0.1386292	948284	ilvY	positive regulator for ilvC [b3773]
A_07_P005751	11292.875	16447.818	212.91464	691.5785	1.8339889	2.2068064	-2.1244688	-2.1598988	948286	ilvC	ketol-acid reductoisomerase [b3774]
A_07_P005759	264.85168	396.57205	83.09309	193.21123	-0.02758789	0.38514447	0.0705632	-0.44710517	948285	ppiC	peptidyl-prolyl cis-trans isomerase C [b3775]
A_07_P005761	7.610682	3.501385	2.9450724	7.08045	0.15776432	-1.1320016	0.55857766	0.08906829			orf, hypothetical protein [b3776]
A_07_P005766	15.328937	10.917421	10.47901	13.499175	0.015898108	-0.64339375	1.2376784	-0.13200045	2847676	yifN	orf, hypothetical protein [b3777]
A_07_P005771	335.3096	442.31342	135.63689	267.9969	-0.06853342	0.16137576	0.3962574	-0.35632312	948292	rep	rep helicase, a single-stranded DNA dependent ATPase [b3778]
A_07_P005780	804.74115	1131.8772	299.58112	398.26706	-0.16330981	0.15914512	0.18164718	-1.1426096	948291	gpp	guanosine pentaphosphatase; exopolyphosphatase [b3779]
A_07_P005782	2016.6128	2747.0437	553.5617	945.13995	0.06188059	0.33816147	-0.032700777	-0.99596524	948290	rhlB	putative ATP-dependent RNA helicase [b3780]
A_07_P005789	1493.0121	1737.429	657.0887	1256.5487	-0.02042675	0.028634548	0.56604195	-0.2336986	948289	trxA	thioredoxin 1 [b3781]
A_07_P005791	5687.8853	7587.842	1203.8568	4478.3623	0.2303145	0.4764459	-0.23937964	-0.07911849	948297	rho	transcription termination factor Rho; polarity suppressor [b3783]
A_07_P005799	1077.4152	1391.5428	402.5057	822.048	-0.09928703	0.10015726	0.2507553	-0.4540789	948789	rfe	UDP-GlcNAc:undecaprenylphosphate GlcNAc-1-phosphate transferase; synthesis of enterobacterial common antigen [b3784]
A_07_P005801	1010.503	1039.9543	334.5345	640.0939	0.07361412	-0.054605246	0.24930203	-0.54961586	944815	wzzE	putative transport protein [b3785]
A_07_P005810	1507.4791	1856.9691	567.4126	776.15533	-0.019715548	0.11142945	0.3411517	-0.9419484	944789	rffE	UDP-N-acetyl glucosamine -2-epimerase; synthesis of enterobacterial common antigen [b3786]
A_07_P005811	681.2744	1009.9707	185.52257	319.35358	0.070357084	0.46869683	-0.03574848	-0.9872359	948977	rffD	UDP-N-acetyl-D-mannosaminuronic acid dehydrogenase; synthesis of enterobacterial common antigen [b3787]
A_07_P005816	487.43845	740.4943	145.81049	204.1662	-0.010797977	0.4228046	0.018611908	-1.2307858	948300	rffG	dTDP-glucose 4,6-dehydratase [b3788]
A_07_P005823	1259.5967	1697.1473	283.5981	512.4422	0.27218103	0.53266597	-0.10832524	-0.989831	948299	rffH	glucose-1-phosphate thymidylyltransferase [b3789]
A_07_P005826	290.47748	287.6742	89.16042	81.495636	0.050842524	-0.13281417	0.11742699	-1.7473011	948298	rffC	orf, hypothetical protein [b3790]
A_07_P005832	688.15283	856.9956	158.89214	336.3265	0.19110107	0.33799338	-0.15304482	-0.8062773	948296	rffA	putative regulator [b3791]
A_07_P005838	511.86395	625.967	126.85866	290.07605	0.131701	0.25236106	-0.110301256	-0.65214026	948294	wzxE	putative cytochrome [b3792]
A_07_P005842	490.36807	622.4539	115.092354	278.76834	0.111736774	0.28617167	-0.20880127	-0.66757345			orf, conceptual translation in SwissProt is fused with b4405 [b4404]
A_07_P005848	221.09166	217.51186	60.64106	132.34401	0.11547935	-0.07773745	0.019736528	-0.58938503			orf, conceptual translation in SwissProt is fused with b4404 [b4405]
A_07_P005852	586.5719	836.11176	138.38388	348.01773	0.14628577	0.48800778	-0.16681015	-0.5713725	948293	wzyE	TDP-Fuc4NAc:lipidII transferase; synthesis of enterobacterial common antigen [b3793]
A_07_P005860	86.8521	126.13611	37.832165	65.37095	-0.19094586	0.17773664	0.38064253	-0.5653689	948301	rffM	probable UDP-N-acetyl-D-mannosaminuronic acid transferase; synthesis of enterobacterial common antigen [b3794]
A_07_P005861	523.5061	849.42676	154.47012	178.49657	-0.034873486	0.49374342	-0.025216699	-1.5516951	945400	yifK	putative amino acid/amine transport protein [b3795]
A_07_P005867	38.233208	51.202694	31.103846	110.961494	-0.7427834	-0.49105656	0.7300185	0.82986534	949013	aslB	putative arylsulfatase regulator [b3800]
A_07_P005873	24.803152	21.526829	11.06912	46.304764	-0.2890159	-0.66306996	0.31753635	0.6471095	949015	aslA	arylsulfatase [b3801]
A_07_P005880	1684.4606	1926.8102	346.16776	1049.4686	0.22454953	0.24881005	-0.2876587	-0.42259026	948311	hemY	a late step of protoheme IX synthesis [b3802]
A_07_P005885	1080.2906	1297.8839	160.85352	908.7759	0.13834238	0.2334187	-0.8387219	-0.075591326	948446	hemX	uroporphyrinogen III methylase [b3803]
A_07_P005889	2502.6963	4367.2236	569.7741	2339.7825	-0.039747953	0.5938189	-0.40423322	-0.10136843	948587	hemD	uroporphyrinogen III synthase [b3804]
A_07_P005892	831.1742	1215.481	245.2381	749.55054	-0.0040225983	0.37461543	0.0055440664	-0.117660046	947759	hemC	porphobilinogen deaminase = hydroxymethylbilane synthase [b3805]
A_07_P005898	776.6845	715.98553	238.56146	449.15765	0.065582514	-0.22148228	0.13314998	-0.68903613	947755	cyaA	adenylate cyclase [b3806]
A_07_P005904	740.1097	530.84607	359.91522	540.9353	0.1932838	-0.45582843	0.92373705	-0.22351146	947754	cyaY	orf, hypothetical protein [b3807]
A_07_P005909	19.403826	15.384586	12.82499	19.272015	-0.05976224	-0.5642842	1.1133897	-0.034108043			orf, hypothetical protein [b3808]
A_07_P005914	814.6477	963.12177	383.54727	580.71497	-0.033614397	0.038261175	0.6501498	-0.4864719	948364	dapF	diaminopimelate epimerase [b3809]
A_07_P005917	301.04935	374.7136	138.46678	289.4252	-0.07090998	0.07521129	0.57916486	-0.09223127	948359	yigA	orf, hypothetical protein [b3810]
A_07_P005923	785.03613	1050.6327	153.76187	842.15796	-0.0853107	0.1654501	-0.6668366	0.051508904	948355	xerC	site-specific recombinase, acts on cer sequence of ColE1, effects chromosome segregation at cell division [b3811]
A_07_P005927	562.0326	808.04926	123.55646	508.55673	0.06440139	0.41852427	-0.35054624	-0.044356108	948357	yigB	putative phosphatase [b3812]
A_07_P005932	1127.1113	1117.2869	420.1331	481.5682	0.150136	-0.03216076	0.4969597	-1.0411942	948347	uvrD	DNA-dependent ATPase I and helicase II [b3813]
A_07_P005938	1156.5007	1474.5365	278.84668	1053.6985	-0.021611929	0.1592176	-0.30329847	-0.120428085			orf, hypothetical protein [b3814]
A_07_P005945	161.01048	160.16412	63.42742	205.05692	-0.09694052	-0.27421057	0.32961857	0.2874173	2847679	yigE	orf, hypothetical protein [b3815]
A_07_P005948	631.2367	342.94128	547.9909	235.81071	0.4276185	-0.62226725	1.9941254	-0.95744526	948351	corA	Mg2+ transport, system I [b3816]
A_07_P005951	9.300613	7.884146	6.5912027	10.952707	-0.3298403	-0.73787785	0.9439113	-0.05846238	948340	yigF	orf, hypothetical protein [b3817]
A_07_P005960	2.62468	2.5588205	1.8182832	3.0212142	-0.18104076	-0.38736975	1.0599301	0.05743432	948344	yigG	orf, hypothetical protein [b3818]
A_07_P005965	247.85286	416.55798	235.04465	278.39468	-0.31072247	0.2686448	1.3832641	-0.107586384	948330	rarD	orf, hypothetical protein [b3819]
A_07_P005970	777.9115	811.4348	1018.56946	1204.934	-0.38784194	-0.49663973	1.7715607	0.27892184	948338	yigI	orf, hypothetical protein [b3820]
A_07_P005971	692.5635	607.97595	210.92989	407.11658	0.14876771	-0.20883131	0.20412004	-0.58224916	948307	pldA	outer membrane phospholipase A [b3821]
A_07_P005980	185.81038	226.22226	98.94117	154.83672	-0.031274796	0.08296883	0.83007276	-0.25887012	948318	recQ	ATP-dependent DNA helicase [b3822]
A_07_P005985	235.17053	475.07883	220.70908	413.71008	-0.78714645	0.057647467	0.89182806	0.063254595	947262	sdaB	L-serine dehydratase [b2797]
A_07_P005989	155.6181	174.11299	58.315445	215.72426	-0.26370478	-0.27135706	0.09077072	0.24296188	947256	ygdG	5-3 exonuclease [b2798]
A_07_P005991	1106.4327	1238.7297	125.388695	8596.811	0.042774916	0.036054373	-1.3281261	3.036149	947273	fucO	L-1,2-propanediol oxidoreductase [b2799]
A_07_P005999	1093.8286	1131.6295	46.05224	8334.828	0.09396052	-0.026691437	-2.7054758	3.0592134	947282	fucA	L-fuculose-1-phosphate aldolase [b2800]
A_07_P006001	58.299988	137.57036	14.392454	264.46225	-0.4223683	0.64656687	-0.67001647	1.7946138	947487	fucP	fucose permease [b2801]
A_07_P006006	36.41298	49.77925	13.85562	170.05446	-0.35804093	-0.07661545	0.018512785	1.9009192	946195	fucI	L-fucose isomerase [b2802]
A_07_P006014	678.49066	442.87573	102.07132	680.49304	0.37730885	-0.40778422	-0.5849068	0.41704893	946022	fucK	L-fuculokinase [b2803]
A_07_P006018	634.4033	362.25174	98.288315	561.42957	0.5509074	-0.42716694	-0.3688662	0.4100995	945842	fucU	protein of fucose operon [b2804]
A_07_P006024	162.77873	149.20976	56.997025	439.5398	-0.1642654	-0.45950246	0.09231591	1.3043039	946905	fucR	positive regulator of the fuc operon [b2805]
A_07_P006026	556.8037	501.72488	241.60497	344.9801	0.05249238	-0.26744628	0.6185092	-0.60267496	947283	ygdE	orf, hypothetical protein [b2806]
A_07_P006031	924.2275	876.39087	321.17572	461.90027	0.083936214	-0.16240287	0.3295864	-0.8812423	947279	ygdD	orf, hypothetical protein [b2807]
A_07_P006036	508.0047	301.3524	161.37532	214.9609	0.2932303	-0.62982607	0.40934372	-0.91204906	947278	gcvA	positive regulator of gcv operon [b2808]
A_07_P006042	235.76154	204.15506	134.32175	245.25504	0.017412186	-0.35991645	0.9763124	0.1098547	947276	ygdI	orf, hypothetical protein [b2809]
A_07_P006050	547.1052	628.269	226.7719	404.7587	0.0020115376	0.03190875	0.5019705	-0.3972566	947275	csdA	orf, hypothetical protein [b2810]
A_07_P006052	660.671	761.5762	362.3504	614.1387	-0.057568073	-0.022178411	0.8464215	-0.12744689	947274	csdE	orf, hypothetical protein [b2811]
A_07_P006060	98.07861	107.89643	30.586205	48.624466	0.07880604	0.046776652	0.1682837	-0.89796174	947291	ygdL	putative enzyme [b2812]
A_07_P006061	988.2435	1047.9885	340.9499	678.49243	0.061409473	-0.023572683	0.296638	-0.44563627	944964	mltA	membrane-bound lytic murein transglycosylase A [b2813]
A_07_P006068	584.665	653.17206	554.1779	757.43414	-0.35533786	-0.36515164	1.3379364	0.053660154	947293	amiC	putative amidase [b2817]
A_07_P006074	118.39545	416.98087	63.025604	352.0007	-1.2464787	0.40022254	-0.38554716	0.3609736	947289	argA	N-acetylglutamate synthase; amino acid acetyltransferase [b2818]
A_07_P006076	247.2388	334.43964	53.708992	151.71788	0.23257959	0.4987538	-0.19955432	-0.4364463	947287	recD	DNA helicase, ATP-dependent dsDNA/ssDNA exonuclease V subunit, ssDNA endonuclease [b2819]
A_07_P006083	988.5729	1159.2838	177.52354	442.8213	0.32001138	0.38015962	-0.38678992	-0.80312395	947286	recB	DNA helicase, ATP-dependent dsDNA/ssDNA exonuclease V subunit, ssDNA endonuclease [b2820]
A_07_P006090	545.5595	608.8652	134.10501	206.69087	0.14874291	0.13746333	-0.10509527	-1.2160306	947284	ptrA	protease III [b2821]
A_07_P006092	137.78915	156.66946	55.138695	97.81393	0.03138256	0.046978116	0.48059285	-0.4274795	947294	recC	DNA helicase, ATP-dependent dsDNA/ssDNA exonuclease V subunit, ssDNA endonuclease [b2822]
A_07_P006097	117.75908	148.43788	52.599113	156.58818	-0.38653004	-0.22217524	0.22127736	0.060094595	945797	ppdC	prepilin peptidase dependent protein C [b2823]
A_07_P006104	52.721333	77.250374	27.327068	62.353497	-0.44599044	-0.064501524	0.37648892	-0.16841829	944763	ygdB	orf, hypothetical protein [b2824]
A_07_P006110	57.017185	82.48775	29.120132	87.17691	-0.5189222	-0.15580547	0.28223372	0.12911582	948985	ppdB	prepilin peptidase dependent protein B [b2825]
A_07_P006115	24.49511	36.52312	15.150989	65.69248	-0.8955871	-0.48893714	0.18186665	0.56313586	945393	ppdA	prepilin peptidase dependent protein A [b2826]
A_07_P006119	2071.8208	3155.1506	468.50995	1081.7942	0.14413452	0.58127666	-0.23007941	-0.7578511	949035	thyA	thymidylate synthetase [b2827]
A_07_P006122	1671.8466	1947.7764	413.27737	920.03186	0.19013524	0.24085546	-0.05558896	-0.6360626	947303	lgt	phosphatidylglycerol-prolipoprotein diacylglyceryl transferase; a major membrane phospholipid [b2828]
A_07_P006126	338.83923	386.34097	84.334015	343.87564	0.019887686	0.039494753	-0.2159921	0.07666135	947301	ptsP	PTS system, enzyme I, transcriptional regulator [b2829]
A_07_P006135	2525.8315	3222.4795	857.4501	1923.1683	-0.081944704	0.09980202	0.12995672	-0.43973017	947300	rppH	putative invasion protein [b2830]
A_07_P006136	82.647125	87.95731	40.048058	123.035736	-0.31493783	-0.39476562	0.410365	0.29459095	947299	mutH	methyl-directed mismatch repair [b2831]
A_07_P006141	7171.711	4575.34	2144.8823	2475.1335	0.41849732	-0.39960742	0.4476149	-1.0808253	947295	ygdQ	putative transport protein [b2832]
A_07_P006149	1579.1321	821.0053	705.7907	1611.8108	-0.010379553	-1.1237144	0.59833574	0.054658413	947304	ygdR	orf, hypothetical protein [b2833]
A_07_P006155	405.30862	477.49683	92.47473	502.04736	-0.0342443	0.032559395	-0.39559913	0.31004524	947306	tas	orf, hypothetical protein [b2834]
A_07_P006156	63.06226	77.457855	36.03273	49.82519	-0.080881596	0.04608667	0.8821851	-0.3852949	947317	lplT	putative resistance proteins [b2835]
A_07_P006161	360.5174	336.1316	180.2428	341.7993	-0.02126813	-0.2919774	0.7491398	-0.06269884	947315	aas	2-acyl-glycerophospho-ethanolamine acyltransferase; acyl-acyl-carrier protein synthetase [b2836]
A_07_P006169	291.28333	367.1963	128.05171	395.8636	-0.34641027	-0.18194962	0.23842788	0.13165712	947314	galR	repressor of galETK operon [b2837]
A_07_P006174	1741.1252	1518.3732	48.7505	2140.0276	0.32131553	-0.045844078	-3.0666082	0.6544125	947313	lysA	diaminopimelate decarboxylase [b2838]
A_07_P006179	21.639519	19.801693	10.940648	24.509508	-0.17144346	-0.46915472	0.61512154	0.043717504	947311	lysR	positive regulator for lys [b2839]
A_07_P006185	203.61366	134.26271	69.61781	147.65541	0.20660937	-0.5638323	0.42883933	-0.22150207	947348	ygeA	putative resistance proteins [b2840]
A_07_P006186	83.20004	64.422	21.840805	98.78256	0.05506468	-0.4836322	-0.10395807	0.33822465	947341	araE	low-affinity L-arabinose transport system proton symport protein [b2841]
A_07_P006191	203.06305	248.32376	62.48233	237.36957	-0.110556364	0.010071397	-0.04042864	0.1501391	947323	kduD	2-deoxy-D-gluconate 3-dehydrogenase [b2842]
A_07_P006198	1635.1682	1723.5453	751.6096	1711.8207	-0.103826046	-0.19755197	0.54532623	-0.0022451878	947319	kduI	homolog of pectin degrading enzyme 5-keto 4-deoxyuronate isomerase [b2843]
A_07_P006203	95.51294	668.0163	33.021744	1566.4967	-1.0362052	1.600244	-0.7979492	3.0349844	947324	yqeF	putative acyltransferase [b2844]
A_07_P006207	450.89166	564.65533	277.9381	458.2117	-0.19895244	-0.044028282	0.87356627	-0.14023042	945028	yqeG	putative transporter protein [b2845]
A_07_P006215	10.424232	9.211074	8.511347	10.237666	-0.09828174	-0.44644773	1.379772	-0.088847876	945263	yqeH	orf, hypothetical protein [b2846]
A_07_P006220	19.584732	12.611732	8.424807	15.522957	0.13552284	-0.66910625	0.6890449	-0.16431475	947327	yqeI	putative sensory transducer [b2847]
A_07_P006225	13.082078	8.108439	8.6553955	14.155985	0.043777347	-0.8159847	1.2183926	0.19308567	947328	yqeJ	orf, hypothetical protein [b2848]
A_07_P006226	8.424902	5.003521	4.5022607	9.975611	-0.19766784	-1.1190501	0.66885734	0.08156562	947329	yqeK	orf, hypothetical protein [b2849]
A_07_P006234	497.5982	490.5532	386.99838	669.7447	-0.15016675	-0.34040475	1.2577145	0.3139515	946823	ygeF	orf, hypothetical protein [b2850]
A_07_P006238	12.678066	8.545488	6.959987	13.986661	-0.11532557	-0.85409176	0.7900315	0.061879158	946986	ygeG	orf, hypothetical protein [b2851]
A_07_P006245	12.598814	10.634299	9.011125	16.330399	-0.2110827	-0.6253122	1.0759437	0.1986773	946265	ygeH	putative invasion protein [b2852]
A_07_P006250	14.25125	8.07173	9.778963	15.156954	-0.11007142	-1.0998766	1.1171288	0.014307737	947336	ygeI	orf, hypothetical protein [b2853]
A_07_P006253	29.71648	30.389357	21.371876	26.721334	-0.047760487	-0.18512344	1.2472256	-0.1655432	947338	pbl	orf, hypothetical protein [b2854]
A_07_P006257	24.972729	20.923407	12.284113	26.762028	-0.16651022	-0.59141207	0.5804655	-0.03118825	947332	ygeK	putative 2-component transcriptional regulator [b2855]
A_07_P006262	18.81513	11.485383	13.639519	15.159078	0.18506551	-0.6966952	1.4915004	-0.091157556	947332	ygeK	orf, hypothetical protein [b2856]
A_07_P006266	215.45341	243.00977	269.44693	188.16554	-0.135728	-0.13175535	1.9574327	-0.29561365			orf, hypothetical protein [b2857]
A_07_P006273	18.094063	10.000988	10.114617	14.973732	0.20154774	-0.8234923	1.1330086	-0.036046505	2847705	ygeN	orf, hypothetical protein [b2858]
A_07_P006278	6.436047	3.3769038	3.719199	4.1603847	0.17190337	-0.9282367	1.1512558	-0.42206633	947325	ygeO	orf, hypothetical protein [b2859]
A_07_P006282	13.443808	7.6486354	6.0477114	12.281277	-0.027979612	-1.0113134	0.5900755	-0.122972846			orf, hypothetical protein [b2862]
A_07_P006287	8.228943	9.745518	2.1933055	4.9082294	0.16731274	0.24167812	0.030247927	-0.5427034	947344	ygeQ	orf, hypothetical protein [b2863]
A_07_P006295	577.5154	698.9859	222.26292	552.1959	-0.083179235	0.022558212	0.30976486	-0.112369776	947352	ygeR	putative lipoprotein [b2865]
A_07_P006300	84.31411	85.64588	19.505331	311.43335	-0.19136405	-0.3384204	-0.5327341	1.7292019	947116	xdhA	orf, hypothetical protein [b2866]
A_07_P006304	471.43924	535.16815	181.90483	727.0712	-0.24010634	-0.2268517	0.15654182	0.42040777	947205	xdhB	putative dehydrogenase [b2867]
A_07_P006310	2256.8813	2043.2374	249.94048	1767.6053	0.3846326	0.07149291	-1.0195053	0.0675869	945148	xdhC	putative dehydrogenase [b2868]
A_07_P006312	278.2352	296.01706	61.37004	2498.5522	-0.23547673	-0.31576717	-0.64563954	2.9667268	947320	ygeV	putative transcriptional regulator [b2869]
A_07_P006316	52.986675	44.885952	15.080282	177.75482	0.03131032	-0.3777212	-0.011120021	1.8129857	945826	ygeW	putative carbamoyl transferase [b2870]
A_07_P006321	37.979122	46.561825	10.385739	139.2251	-0.20797169	-0.083696604	-0.3080389	1.7016578	947012	ygeX	putative dehydratase [b2871]
A_07_P006326	37.80519	43.908417	11.327934	71.89913	-0.1329304	-0.08668351	-0.10109413	0.82994795	947360	ygeY	putative deacetylase [b2872]
A_07_P006331	32.28424	34.18595	11.8824215	76.68246	-0.15794635	-0.2450391	0.17058772	1.1256084	947359	hyuA	orf, hypothetical protein [b2873]
A_07_P006336	240.54929	222.53844	62.370808	235.70311	0.11628997	-0.16565406	-0.060563803	0.122416854	947358	yqeA	putative kinase [b2874]
A_07_P006342	128.84706	54.400814	14.555748	535.31854	0.7643938	-0.6492319	-0.6110695	2.85462	947357	yqeB	putative synthases [b2875]
A_07_P006347	68.56038	43.006325	9.009103	733.1029	0.5210997	-0.32139242	-0.6362843	3.9751573	947350	yqeC	orf, hypothetical protein [b2876]
A_07_P006352	78.21875	72.58906	16.058289	697.9143	0.12068117	-0.15674758	-0.3929795	3.3136327	947356	ygfJ	orf, hypothetical protein [b2877]
A_07_P006359	21.895527	17.574924	9.538216	58.193737	-0.37808084	-0.8648647	0.1936099	1.0676357	949068	ygfK	putative oxidoreductase, Fe-S subunit [b2878]
A_07_P006362	27.024134	21.58428	7.985997	75.18206	0.10912025	-0.38481343	0.12095159	1.6207482	949072	ssnA	putative proteoglycan [b2879]
A_07_P006368	45.017723	40.613697	20.839428	74.14127	-0.23301506	-0.5512085	0.4263426	0.5222564	949071	ygfM	orf, hypothetical protein [b2880]
A_07_P006371	227.4044	216.31364	62.048344	231.56659	0.126804	-0.11499739	0.02354455	0.18845963	949079	xdhD	putative dehydrogenase [b2881]
A_07_P006377	69.1924	59.824486	23.868893	105.90343	-0.112418175	-0.4919622	0.12263489	0.53713334	949075	ygfO	putative transport protein [b2882]
A_07_P006382	46.10725	48.868507	12.953988	95.80217	-0.012786746	-0.098542094	-0.073848784	1.0777655	947366	guaD	orf, hypothetical protein [b2883]
A_07_P006388	50.755627	52.85044	14.446805	106.26699	0.05293584	-0.05838287	0.010653913	1.154478	2847748	ygfQ	orf, hypothetical protein [b2884]
A_07_P006392	62.20173	63.143036	16.789974	146.935	0.011566043	-0.13643122	-0.107253075	1.2872058			putative oxidoreductase [b2885]
A_07_P006399	59.467564	58.77672	33.350063	136.41599	-0.5220926	-0.7086171	0.4140296	0.7112335	949016	ygfS	putative oxidoreductase, Fe-S subunit [b2886]
A_07_P006405	24.545795	28.815668	10.1769495	49.917763	-0.31383502	-0.25212324	0.18653017	0.7457309	949018	ygfT	putative oxidoreductase, Fe-S subunit [b2887]
A_07_P006408	35.399147	23.542625	14.8594265	83.30042	-0.17239416	-0.93050003	0.34580493	1.097703	949017	ygfU	putative permease [b2888]
A_07_P006415	75.47173	71.81399	24.053928	164.42047	-0.122020245	-0.36335742	-0.0011479855	1.0368496	949020	idi	putative enzyme [b2889]
A_07_P006416	3258.7395	3670.1887	300.56198	1209.9152	0.6489301	0.6508043	-1.0191138	-0.74498916	947372	lysS	lysine tRNA synthetase, constitutive; suppressor of ColE1 mutation in primer RNA [b2890]
A_07_P006421	2603.6213	2881.1018	388.22855	1171.2949	0.5088866	0.4853201	-0.46611953	-0.60804033	947369	prfB	peptide chain release factor RF-2 [b2891]
A_07_P006426	769.05334	915.6344	194.76529	375.59494	0.12897277	0.21099472	-0.08183932	-0.8694453	947367	recJ	ssDNA exonuclease, 5 --> 3 specific [b2892]
A_07_P006435	3634.4426	3473.5234	752.48755	2316.919	0.31076455	0.075763464	-0.19069576	-0.30327392	947363	dsbC	protein disulfide isomerase II [b2893]
A_07_P006436	720.6798	752.6099	216.78676	515.564	0.07912278	-0.027999878	0.11657572	-0.36859536	947362	xerD	site-specific recombinase [b2894]
A_07_P006442	807.80414	755.7972	326.76636	527.84204	0.14649987	-0.119172335	0.6112895	-0.43191123	947361	fldB	flavodoxin 2 [b2895]
A_07_P006446	898.82135	1245.3572	422.31107	1254.4846	-0.4400475	-0.13926005	0.24076009	0.07642937	947379	ygfX	orf, hypothetical protein [b2896]
A_07_P006453	653.95966	891.03326	257.05746	924.4401	-0.32600617	-0.04939437	0.09741855	0.2088604	947382	ygfY	orf, hypothetical protein [b2897]
A_07_P006456	1938.5037	2002.365	376.3251	1524.6261	0.27651834	0.1536138	-0.31783843	-0.034481525	947384	ygfZ	orf, hypothetical protein [b2898]
A_07_P006461	606.1653	874.6679	415.7206	1227.2612	-0.7485049	-0.38914633	0.4779346	0.30464387	947381	yqfA	putative oxidoreductase [b2899]
A_07_P006468	152.59424	157.04533	41.193943	103.32905	0.13739872	0.009212971	0.018737793	-0.38956785	947380	yqfB	orf, hypothetical protein [b2900]
A_07_P006471	3353.8606	3087.6995	632.3652	1085.3068	0.43774438	0.14878774	-0.19871283	-1.1544874	947378	bglA	6-phospho-beta-glucosidase A; cryptic [b2901]
A_07_P006477	7.027707	7.106257	4.0196185	10.206504	-0.40726745	-0.5608977	0.5572727	0.16658366	947373	ygfF	putative oxidoreductase [b2902]
A_07_P006481	224.1276	712.3391	40.10715	943.5169	-0.7529807	0.7455971	-1.464834	1.3562353	947394	gcvP	glycine decarboxylase, P protein of glycine cleavage system [b2903]
A_07_P006489	529.33264	1980.0166	110.731705	2890.4033	-0.81686854	0.91673017	-1.3034397	1.6676426	947393	gcvH	in glycine cleavage complex, carrier of aminomethyl moiety via covalently bound lipoyl cofactor [b2904]
A_07_P006491	592.3481	3166.6887	190.63937	5888.1616	-1.0609896	1.1878018	-0.9260535	2.2877982	947390	gcvT	aminomethyltransferase [b2905]
A_07_P006496	514.0881	481.73312	98.493614	303.87527	0.4277358	0.16428876	-0.18564177	-0.2953124	947389	visC	orf, hypothetical protein [b2906]
A_07_P006505	717.5273	670.06885	129.88521	378.87283	0.48075485	0.21236444	-0.21450567	-0.40507698	947388	ubiH	2-octaprenyl-6-methoxyphenol--> 2-octaprenyl-6-methoxy-1, 4-benzoquinone [b2907]
A_07_P006506	305.81787	302.26694	63.404972	171.06567	0.36777973	0.18126273	-0.1316899	-0.43485475	947385	pepP	proline aminopeptidase P II [b2908]
A_07_P006514	4503.525	4624.132	820.15094	1984.8391	0.36275625	0.23121881	-0.32380104	-0.78378797	947400	ygfB	orf, hypothetical protein [b2909]
A_07_P006520	13153.063	14230.179	4786.3413	7039.846	0.08366084	0.027549744	0.39579344	-0.78263354	947404	zapA	orf, hypothetical protein [b2910]
A_07_P006525	454.59644	751.92914	490.37198	530.1507	-0.39777732	0.15856624	1.4820473	-0.14047313	945167	ygfA	putative ligase [b2912]
A_07_P006526	1892.1764	2493.731	67.715164	580.6382	0.7934265	1.0220194	-2.2404618	-0.8754208	945258	serA	D-3-phosphoglycerate dehydrogenase [b2913]
A_07_P006532	1153.9868	1273.0199	305.3359	655.7418	0.23239255	0.20435405	0.08477116	-0.54754615	947407	rpiA	ribosephosphate isomerase, constitutive [b2914]
A_07_P006538	107.75758	97.93152	56.979977	149.3369	-0.2807107	-0.58832157	0.57056236	0.22555888	946707	yqfE	orf, hypothetical protein [b2915]
A_07_P006542	239.37634	325.29373	95.54366	230.06317	-0.23119831	0.041597843	0.21428907	-0.25296044	944867	argP	replication initiation inhibitor, binds to 13-mers at oriC [b2916]
A_07_P006550	39.180973	44.785374	33.53995	45.519695	-0.11013985	-0.086931944	1.4361229	0.1416856	945576	scpA	methylmalonyl-CoA mutase [b2917]
A_07_P006554	12.379056	5.507415	6.4480624	9.889592	0.21557343	-1.1225468	1.0451452	-0.072856665	947412	argK	putative nucleotide-binding protein [b2918]
A_07_P006556	8.731943	8.604524	7.7850404	11.996655	-0.44054282	-0.6314167	1.1643944	0.053202987	947408	scpB	putative enzyme [b2919]
A_07_P006564	61.13734	55.75332	37.30117	122.795265	-0.38914406	-0.6918067	0.6685586	0.6524737	947402	scpC	putative coenzyme A transferase [b2920]
A_07_P006568	17.07358	17.134642	15.55636	46.102726	-0.7202635	-0.8847798	0.91601086	0.7483113	947401	ygfI	putative transcriptional regulator LYSR-type [b2921]
A_07_P006571	1695.8857	1718.9429	388.7144	641.8234	0.35882926	0.2086463	0.004108906	-1.0074725	945691	potC	spermidine/putrescine transport system permease [b1124]
A_07_P006577	286.65237	303.19907	106.99866	139.51668	0.12360048	0.0348984	0.47242725	-0.8797754	945692	potB	spermidine/putrescine transport system permease [b1125]
A_07_P006583	1809.1155	1798.8517	505.8557	971.8033	0.17992091	0.0020468235	0.11196971	-0.68113947	946323	potA	ATP-binding component of spermidine/putrescine transport [b1126]
A_07_P006587	1769.6654	1401.5778	150.0811	884.0697	0.8618331	0.35574198	-0.9272934	-0.103922844	946333	pepT	putative peptidase T [b1127]
A_07_P006595	537.0876	597.9566	112.72679	452.76913	0.086049795	0.07126665	-0.3957417	-0.12484336	945391	ycfD	orf, hypothetical protein [b1128]
A_07_P006600	338.22382	379.0978	94.8086	339.19263	0.032163143	0.02708888	-0.032189846	0.07177758	946326	phoQ	sensor protein PhoQ [b1129]
A_07_P006601	764.43896	919.2094	146.28358	753.5981	0.09295511	0.18928123	-0.5221431	0.10783744	945697	phoP	transcriptional regulatory protein [b1130]
A_07_P006606	1995.8724	2191.8071	380.23672	730.43805	0.3207059	0.28614187	-0.3008082	-1.0939913	945695	purB	adenylosuccinate lyase [b1131]
A_07_P006612	2946.6567	2923.9644	546.1235	1428.6439	0.4915383	0.31071877	-0.1697061	-0.517406	945693	hflD	orf, hypothetical protein [b1132]
A_07_P006616	1780.3004	2150.5413	439.88077	1240.4407	0.12862039	0.23153305	-0.117780924	-0.35715985	945690	mnmA	orf, hypothetical protein [b1133]
A_07_P006621	677.87915	971.73456	132.16933	582.1978	0.06981659	0.41968393	-0.51828885	-0.114213705	945689	nudJ	putative phosphohydrolase [b1134]
A_07_P006629	787.5112	1108.8915	159.90282	635.8236	0.06153035	0.38561058	-0.46803916	-0.2116549	945701	rluE	orf, hypothetical protein [b1135]
A_07_P006631	650.09265	1233.1317	192.34285	796.2488	-0.15974355	0.5941992	-0.14617348	0.16831851	945702	icd	isocitrate dehydrogenase, specific for NADP+ [b1136]
A_07_P006636	703.154	1159.4202	169.01323	1060.1857	-0.4463377	0.10548735	-0.7325071	0.18155432	945329	ymfD	orf, hypothetical protein [b1137]
A_07_P006641	20.546467	9.494922	6.2013197	16.500256	0.16577005	-1.1175584	0.20806265	-0.115143776	946722	ymfE	orf, hypothetical protein [b1138]
A_07_P006648	6.186502	7.813497	5.242808	3.8590105	-0.1804843	-0.01330626	1.3512669	-0.8258891	948421	lit	phage T4 late gene expression; at locus of e14 element [b1139]
A_07_P006651	14.405608	8.0266905	7.7377996	12.245502	-0.009609103	-1.0230287	0.864291	-0.20849955	948034	intE	prophage e14 integrase [b1140]
A_07_P006656	18.928015	15.8824625	13.313903	19.55386	-0.053460598	-0.47621536	1.2094857	0.028957963	945705	xisE	orf, hypothetical protein [b1141]
A_07_P006662	107.30369	90.2496	64.0087	80.817726	-0.17260611	-0.5919796	0.8525697	-0.5460738			orf, hypothetical protein [b1142]
A_07_P006670	9.051751	6.45601	3.4809496	4.2566185	0.3701948	-0.2870258	0.76201415	-0.68280625	945712	ymfI	orf, hypothetical protein [b1143]
A_07_P006675	11.154644	4.973503	4.780731	10.787828	-0.005097747	-1.3400745	0.54309607	-0.017849922	945718	ymfJ	orf, hypothetical protein [b1144]
A_07_P006676	15.985969	12.102465	10.353201	17.612152	-0.04670751	-0.61787915	1.0970984	0.1285454	945719	ymfK	putative phage repressor [b1145]
A_07_P006683	2021.0887	1907.9657	997.83795	1879.3755	-0.046601772	-0.29936647	0.7056775	-0.1159935	945720	ymfT	orf, hypothetical protein [b1146]
A_07_P006687	2.3416915	2.67595	1.5031384	2.3892114	-0.23816216	-0.21532834	0.8928001	-0.17369056	945717	ymfL	orf, hypothetical protein [b1147]
A_07_P006694	16.380316	10.976826	9.130863	14.470793	0.09113371	-0.6560348	1.0185295	-0.052197337	945715	ymfM	orf, hypothetical protein [b1148]
A_07_P006696	28.4195	25.417158	16.427702	29.534803	-0.09657943	-0.42732418	0.8832053	-0.0055565834	945708	ymfN	orf, hypothetical protein [b1149]
A_07_P006701	67.29786	72.312744	36.871796	64.790726	-0.015743256	-0.08172023	0.8867494	-0.03502822	945700	ymfR	orf, hypothetical protein [b1150]
A_07_P006706	8.338611	4.0518894	5.6748457	6.91562	0.068507314	-1.1423712	1.2838168	-0.16595316	945698	ymfO	orf, hypothetical protein [b1151]
A_07_P006711	22.392925	28.727497	7.3801374	26.157784	-0.2055614	-0.015838027	-0.036349356	0.054124236	945703	ymfP	orf, hypothetical protein [b1152]
A_07_P006716	41.2173	39.24421	33.28894	33.135643	-0.036031604	-0.27646816	1.4262967	-0.31540966	945707	ymfQ	orf, hypothetical protein [b1153]
A_07_P006725	52.746067	40.310097	21.599167	29.472881	0.22083771	-0.33675063	0.7032856	-0.58334935	945726	ycfK	orf, hypothetical protein [b1154]
A_07_P006729	12.111723	6.34756	9.023762	16.801071	-0.23771489	-1.3395113	1.1082175	0.26992226	945724	ymfS	orf, hypothetical protein [b1155]
A_07_P006735	19.995438	19.608366	14.8494425	21.913866	-0.15466797	-0.35253596	1.1866051	0.0129932165	945723	tfaE	orf, hypothetical protein [b1156]
A_07_P006740	74.9101	113.93329	29.50918	68.95166	-0.3331355	0.10215485	0.0934037	-0.4172225	945722	stfE	putative tail fiber protein [b1157]
A_07_P006744	2.1578648	2.3313022	2.3347354	3.0124521	-0.3074261	-0.3655609	1.5767639	0.20939589	945721	pinE	inversion of adjacent DNA; at locus of e14 element [b1158]
A_07_P006746	15.3185835	12.916364	7.901493	15.434841	-0.065778494	-0.4815277	0.7496711	-0.019382596	945727	mcrA	restriction of DNA at 5-methylcytosine residues; at locus of e14 element [b1159]
A_07_P006752	16.48119	15.289954	11.588998	20.994343	-0.3828622	-0.6607647	0.8796089	0.0018064976	945729	elbA	orf, hypothetical protein [b1160]
A_07_P006759	74.12417	135.79326	81.209595	173.73888	-1.1681437	-0.4644146	0.7340976	0.096248865	945733	ycgX	orf, hypothetical protein [b1161]
A_07_P006764	1068.4121	1801.828	510.6932	1291.9869	-0.4329431	0.15138412	0.27265334	-0.12333107	945735	ycgE	putative transcriptional regulator [b1162]
A_07_P006770	124.68593	430.75787	55.16562	260.7738	-0.897143	0.7217691	-0.30306506	0.20284474	947592	ycgF	orf, hypothetical protein [b1163]
A_07_P006771	106.04521	73.639885	84.51243	79.464035	0.061095238	-0.63469124	1.5041869	-0.31972218	945885	ycgZ	orf, hypothetical protein [b1164]
A_07_P006777	37.43947	26.118658	25.638723	25.919325	0.12590504	-0.5632409	1.3502046	-0.36913884	948991	ymgA	orf, hypothetical protein [b1165]
A_07_P006784	251.81345	181.10384	113.93081	174.41388	-0.06333101	-0.70853543	0.5630071	-0.5576829	945340	ariR	orf, hypothetical protein [b1166]
A_07_P006789	67.22699	57.950954	30.286297	40.418865	0.0897634	-0.29411066	0.709924	-0.6087599	945090	ymgC	orf, hypothetical protein [b1167]
A_07_P006792	12.257472	9.156798	5.110144	23.311466	-0.38973892	-0.9801512	0.11857104	0.57312775	945738	ycgG	putative proteases [b1168]
A_07_P006798	12.83426	7.954116	10.230761	12.951957	-0.011920452	-0.8718133	1.4315287	0.036738157			putative ATP-binding component of a transport system [b1169]
A_07_P006805	101.36521	127.2977	108.1732	115.510796	-0.2399621	-0.08098388	1.6243544	-0.016008735			putative part of putative ATP-binding component of a transport system [b1170]
A_07_P006807	3302.1348	859.9642	2017.0568	770.24994	0.9965	-1.1142168	2.0558887	-1.0680122	945732	ymgD	orf, hypothetical protein [b1171]
A_07_P006812	4096.382	2083.6711	4654.2803	1312.8169	0.470474	-0.6744151	2.4252162	-1.1357226	945728	ymgG	orf, hypothetical protein [b1172]
A_07_P006820	48.457966	47.022217	24.166536	74.39602	-0.19170892	-0.40476704	0.57510304	0.46227086			orf, hypothetical protein [b1173]
A_07_P006821	7136.9414	7082.2466	675.2664	6500.359	0.28795648	0.10719061	-1.3432853	0.188658	945740	minE	cell division topological specificity factor, reverses MinC inhibition of ftsZ ring formation [b1174]
A_07_P006827	3415.603	4490.9736	361.5797	3915.7317	0.007366419	0.2325871	-1.461853	0.23999596	945741	minD	cell division inhibitor, a membrane ATPase, activates minC [b1175]
A_07_P006831	904.8053	1239.8202	223.97157	1069.284	-0.14795327	0.13683248	-0.3917097	0.12850046	945744	minC	cell division inhibitor, inhibits ftsZ ring formation [b1176]
A_07_P006839	359.3069	484.03937	60.00723	293.2402	0.17203188	0.43227363	-0.6394409	-0.08561361	946155	ycgJ	orf, hypothetical protein [b1177]
A_07_P006843	4779.8535	3688.7346	549.8665	4960.8677	0.43965745	-0.10384941	-0.9096198	0.52877164	946963	ycgK	orf, hypothetical protein [b1178]
A_07_P006850	689.01996	738.7576	222.31267	649.30585	-0.010869026	-0.079980135	0.12771058	-0.061028242	946226	ycgL	orf, hypothetical protein [b1179]
A_07_P006851	462.65567	544.3376	186.85118	502.72784	-0.12166834	-0.056771755	0.34081805	0.033658743	946115	ycgM	putative isomerase [b1180]
A_07_P006860	135.99843	160.54704	126.69901	176.9284	-0.35544527	-0.28570545	1.3129058	0.059618235	945804	ycgN	orf, hypothetical protein [b1181]
A_07_P006864	95.865616	135.10266	97.6724	137.74654	-0.38524282	-0.059937954	1.4122304	0.17317653	945745	hlyE	hemolysin E [b1182]
A_07_P006868	140.95563	73.04306	138.9879	63.45552	0.6788752	-0.4392128	2.429129	-0.43705988	945746	umuD	SOS mutagenesis; error-prone repair; processed to UmuD; forms complex with UmuC [b1183]
A_07_P006875	96.503746	56.115803	84.86352	64.08861	0.25316787	-0.6986767	1.8382628	-0.3018613	946359	umuC	SOS mutagenesis and repair [b1184]
A_07_P006878	1534.8839	1951.9111	963.55286	1300.395	-0.0090863705	0.16800594	1.0897563	-0.21277714	946344	dsbB	reoxidizes DsbA protein following formation of disulfide bond in P-ring of flagella. [b1185]
A_07_P006885	946.0269	1199.0265	170.98721	483.3216	0.3008232	0.47306705	-0.3966347	-0.63258696	944822	nhaB	Na+/H+ antiporter, pH independent [b1186]
A_07_P006890	428.7945	946.88464	164.78432	639.2423	-0.4780662	0.49516964	-0.08723855	0.13349771	948652	fadR	negative regulator for fad regulon, and positive activator of fabA [b1187]
A_07_P006891	318.65408	183.03593	14.9575	1599.2671	0.33078456	-0.6387458	-2.3117304	2.6936202	946365	ycgB	putative sporulation protein [b1188]
A_07_P006899	306.4458	741.7318	79.1272	1549.6686	-0.2959845	0.80961514	-0.478835	2.07776	945752	dadA	D-amino acid dehydrogenase subunit [b1189]
A_07_P006905	130.82817	315.73166	50.900238	687.67444	-0.5180445	0.5833155	-0.10943818	1.9114964	945754	dadX	alanine racemase 2, catabolic [b1190]
A_07_P006906	95.58918	126.11814	48.366997	113.1762	-0.22535205	0.0048377514	0.5623591	0.05378723	945755	cvrA	orf, hypothetical protein [b1191]
A_07_P006914	649.2625	582.77966	129.06383	401.28098	0.50021744	0.17469907	-0.05996442	-0.15848374	945756	ldcA	orf, hypothetical protein [b1192]
A_07_P006916	456.38345	422.9542	216.51257	331.60226	0.17551756	-0.10389376	0.8702574	-0.24978733	945655	emtA	murein transglycosylase E [b1193]
A_07_P006924	58.444202	79.95973	24.312956	113.72061	-0.43075383	-0.14820611	0.074447274	0.5650965	947609	ycgR	orf, hypothetical protein [b1194]
A_07_P006928	75.442726	47.12738	14.247184	206.49095	0.28175306	-0.5667298	-0.3524164	1.7698662	945760	ymgE	orf, hypothetical protein [b1195]
A_07_P006932	8.035088	3.8330176	3.2295783	5.360166	0.18091094	-1.0565888	0.6364784	-0.36763716	945761	ycgY	orf, hypothetical protein [b1196]
A_07_P006936	287.44516	316.13535	18.741354	684.0257	0.050578117	0.018167615	-2.1178756	1.3368301	945757	treA	trehalase, periplasmic [b1197]
A_07_P006942	561.76556	478.03622	36.87493	232.60706	0.70845294	0.30593824	-1.4502678	-0.52813196	945749	dhaM	putative PTS system enzyme I [b1198]
A_07_P006948	328.90463	295.107	40.352234	232.60153	0.42837358	0.102276325	-0.8280401	-0.035946965	945748	dhaL	putative dihydroxyacetone kinase [b1199]
A_07_P006953	1015.09705	1032.8185	115.499535	823.73425	0.27696395	0.13226771	-1.0881585	0.011085987	945747	dhaK	putative dihydroxyacetone kinase [b1200]
A_07_P006957	112.69863	102.836624	55.343056	122.63558	-0.09500444	-0.39678657	0.64953506	0.06239152	945743	dhaR	putative sensor-type regulator [b1201]
A_07_P006961	12.24061	7.5984917	7.0003366	15.698725	-0.17322087	-1.0307777	0.7911354	0.22123909	945767	ycgV	putative adhesion and penetration protein [b1202]
A_07_P006968	1006.233	1028.4548	191.68048	448.30603	0.5171659	0.37901378	-0.1044873	-0.61375475	945769	ychF	putative GTP-binding protein [b1203]
A_07_P006971	923.9141	727.3529	269.38333	475.0672	0.10729289	-0.40747595	0.09973037	-0.81684566	945765	pth	peptidyl-tRNA hydrolase [b1204]
A_07_P006978	2316.873	1335.0862	49.729374	3796.2366	0.374851	-0.5900619	-3.3965507	1.1227303	945762	ychH	orf, hypothetical protein [b1205]
A_07_P006981	427.92575	361.95013	49.326645	132.8416	0.90239215	0.49115586	-0.44399393	-0.749773	945770	ychM	orf, hypothetical protein [b1206]
A_07_P006987	28871.416	39480.047	3559.0806	22327.441	0.17309117	0.4549067	-1.076438	-0.16224456	945772	prs	phosphoribosylpyrophosphate synthetase [b1207]
A_07_P006991	387.2658	425.11447	78.14926	212.09862	0.29743338	0.262295	-0.24105084	-0.53566754	945774	ispE	orf, hypothetical protein [b1208]
A_07_P006998	504.32785	502.88406	95.20209	276.16605	0.298249	0.12444615	-0.33651316	-0.53508914	945775	lolB	an enzyme in main pathway of synthesis of 5-aminolevulinate, possibly glutamyl-tRNA dehydrogenase [b1209]
A_07_P007001	639.18274	768.5471	294.3787	516.22766	0.0067300797	0.10296965	0.65871024	-0.26600313	945777	hemA	enzyme in alternate path of synthesis of 5-aminolevulinate [b1210]
A_07_P007006	1225.1407	2042.1343	240.41829	841.6676	0.33442307	0.90188694	-0.24437082	-0.1717143	949002	prfA	peptide chain release factor RF-1 [b1211]
A_07_P007012	667.6755	986.75	161.41278	418.8215	0.21317387	0.6070454	-0.0646826	-0.42414832	945779	prmC	possible protoporphyrinogen oxidase [b1212]
A_07_P007017	414.439	769.71906	165.57146	180.28421	-0.29686522	0.4266405	0.1499641	-1.4622641	945781	ychQ	orf, hypothetical protein [b1213]
A_07_P007024	2848.059	2877.8906	460.73172	1031.0198	0.51159525	0.35696173	-0.34585023	-0.9188247	945784	ychA	orf, hypothetical protein [b1214]
A_07_P007028	4167.877	4281.6284	564.8368	1725.262	0.63511634	0.5042963	-0.47775483	-0.60189223	945785	kdsA	2-dehydro-3-deoxyphosphooctulonate aldolase [b1215]
A_07_P007032	308.88654	245.03627	343.9791	215.9896	0.2598673	-0.24388027	2.185647	-0.22075927	945790	chaA	sodium-calcium/proton antiporter [b1216]
A_07_P007036	315.3637	415.34787	54.018604	459.46436	-0.18570328	0.04193425	-0.96065533	0.3927219	945792	chaB	cation transport regulator [b1217]
A_07_P007044	160.64185	203.89726	53.00435	161.18886	-0.13647091	0.03785765	0.034399033	-0.096078396	945793	chaC	cation transport regulator [b1218]
A_07_P007047	593.1031	711.9075	93.18317	605.0516	0.03293848	0.12667799	-0.8666687	0.09720087	945794	ychN	orf, hypothetical protein [b1219]
A_07_P007051	145.99522	222.88101	101.9137	172.71677	-0.38746572	0.053220153	0.86449623	-0.10949111	945801	ychO	putative factor [b1220]
A_07_P007058	333.25894	341.43774	53.242435	203.76326	0.43997455	0.30528748	-0.43548477	-0.23428667	945795	narL	pleiotrophic regulation of anaerobic respiration: response regulator for nar, frd, dms and tor genes [b1221]
A_07_P007061	1050.0613	1023.1935	150.09187	603.7128	0.56859684	0.36153626	-0.46742308	-0.194453	945788	narX	nitrate/nitrate sensor, histidine protein kinase acts on NarL regulator [b1222]
A_07_P007067	901.29047	429.36572	52.8196	219.05254	1.5815251	0.34207463	-0.7407857	-0.42370152	945783	narK	nitrite extrusion protein [b1223]
A_07_P007073	335.72723	214.40964	14.331648	159.74657	1.0257409	0.20915532	-1.7537366	-0.010275364	945782	narG	nitrate reductase 1, alpha subunit [b1224]
A_07_P007077	323.28745	262.41086	16.613235	172.34741	0.7613301	0.29067457	-1.7505467	-0.11067891	945780	narH	nitrate reductase 1, beta subunit [b1225]
A_07_P007083	384.79364	344.32874	20.244009	133.31323	1.0180604	0.6880965	-1.4599223	-0.4757161	945807	narJ	nitrate reductase 1, delta subunit, assembly function [b1226]
A_07_P007089	6194.828	4332.145	2692.094	4480.1924	0.00873065	-0.6769178	0.57693005	-0.4232862	945808	narI	nitrate reductase 1, cytochrome b [b1227]
A_07_P007093	5.7179317	4.186833	2.4484277	3.9769824	0.2621405	-0.35715985	0.80903804	-0.22619057	945809	ychS	orf, hypothetical protein [b1228]
A_07_P007098	2374.2197	2454.36	278.86215	1340.2865	0.5114229	0.38965178	-0.8078706	-0.27800012	945827	purU	formyltetrahydrofolate deformylase; for purT-dependent FGAR synthesis [b1232]
A_07_P007105	557.29865	927.2297	138.5541	454.98605	0.022525549	0.5873351	-0.21494055	-0.23461461	945828	ychJ	orf, hypothetical protein [b1233]
A_07_P007109	825.4987	1205.8838	178.1029	1405.676	-0.2034893	0.17359734	-0.64550805	0.59992504	945725	rssA	orf, hypothetical protein [b1234]
A_07_P007113	908.9669	879.67834	206.68726	1044.5111	0.13027692	-0.086640835	-0.2359662	0.36629272	945855	rssB	Hnr protein [b1235]
A_07_P007116	1098.6388	982.50824	261.1763	520.31586	0.36046672	0.029624224	0.058381557	-0.6823027	945730	galU	glucose-1-phosphate uridylyltransferase [b1236]
A_07_P007124	13675.93	16165.953	2886.8555	10996.458	0.22757578	0.29922938	-0.2459557	-0.051535606	945829	hns	DNA-binding protein HLP-II [b1237]
A_07_P007128	136.04065	168.33115	55.68069	90.4565	-0.042511225	0.095086694	0.43923533	-0.5957649	945834	tdk	thymidine kinase [b1238]
A_07_P007132	80.24663	65.0002	54.602135	56.230244	0.034941792	-0.43872035	1.2499943	-0.4426645			orf, hypothetical protein [b1239]
A_07_P007138	29.379202	33.806816	27.704454	23.685696	-0.0980283	-0.065175414	1.5878301	-0.37331903			orf, hypothetical protein [b1240]
A_07_P007143	69477.17	37335.023	2650.8672	7408.468	2.0786214	1.012944	-0.8628471	-1.1151845	945837	adhE	CoA-linked acetaldehyde dehydrogenase and iron-dependent alcohol dehydrogenase; pyruvate-formate-lyase deactivase [b1241]
A_07_P007149	136.73671	100.20214	75.65298	116.61273	0.08146894	-0.5366844	0.998073	-0.112717986	945836	ychE	putative channel protein [b1242]
A_07_P007151	15117.042	11438.296	543.79456	2415.6494	1.7082896	1.1363206	-1.318145	-0.9019146	945830	oppA	oligopeptide transport; periplasmic binding protein [b1243]
A_07_P007157	2754.703	3802.1206	167.56949	661.2456	1.075465	1.3707061	-1.1930645	-0.9476857	945823	oppB	oligopeptide transport permease protein [b1244]
A_07_P007165	5117.171	7720.5957	373.51218	1123.7777	0.89113617	1.3148351	-1.1144474	-1.260366	945810	oppC	homolog of Salmonella oligopeptide transport permease protein [b1245]
A_07_P007166	2185.7087	3042.481	137.63089	345.21255	0.9795201	1.2870011	-1.239169	-1.6475363	945802	oppD	homolog of Salmonella ATP-binding protein of oligopeptide ABC transport system [b1246]
A_07_P007171	3299.3135	4436.953	166.2205	471.94186	1.2183836	1.47612	-1.3220776	-1.5516148	945818	oppF	homolog of Salmonella ATP-binding protein of oligopeptide ABC transport system [b1247]
A_07_P007178	76.92163	63.31549	31.484257	63.300884	0.17220712	-0.2782899	0.65398395	-0.073468566	945819	yciU	orf, hypothetical protein [b1248]
A_07_P007181	454.74942	420.0109	109.46696	331.81607	0.27039003	-0.013921976	-0.013651729	-0.14881063	945821	cls	cardiolipin synthase, a major membrane phospholipid; novobiocin sensitivity [b1249]
A_07_P007187	729.2859	539.7013	117.68663	832.5269	0.3020208	-0.3019688	-0.5589776	0.5285218	945841	kch	putative potassium channel protein [b1250]
A_07_P007191	839.2747	728.1385	92.35838	887.3672	0.11134553	-0.2632506	-1.3019475	0.22722173	949085	yciI	orf, hypothetical protein [b1251]
A_07_P007196	1457.1445	1461.8759	213.45854	1059.0762	0.32600927	0.16101909	-0.674572	-0.09884071	945843	tonB	energy transducer; uptake of iron, cyanocobalimin; sensitivity to phages, colicins [b1252]
A_07_P007204	36.584656	44.021618	26.315157	37.96872	-0.17912304	-0.0818162	1.1160674	-0.09006238	946634	yciA	orf, hypothetical protein [b1253]
A_07_P007207	914.9071	973.4138	261.23795	619.2163	0.12655783	0.046319723	0.0888325	-0.40113616	946228	yciB	orf, hypothetical protein [b1254]
A_07_P007212	937.5292	1070.3915	373.79327	640.09515	-0.036836386	-0.015298367	0.40707684	-0.5519247	945844	yciC	orf, hypothetical protein [b1255]
A_07_P007216	1277.9167	1106.6515	33.185448	2537.8464	0.20070648	-0.17655349	-3.2958584	1.2260046	945128	ompW	putative outer membrane protein [b1256]
A_07_P007225	12.375879	3.8475878	6.0016575	9.342	0.32547748	-1.5296936	1.051915	-0.044761896	946871	yciE	orf, hypothetical protein [b1257]
A_07_P007230	12.801109	4.735876	4.456801	10.302942	0.23796868	-1.3662632	0.4863156	-0.039755344	947133	yciF	putative structural proteins [b1258]
A_07_P007235	18.201874	12.00567	12.28638	18.336243	0.10531163	-0.6647258	1.3088202	0.15141046	947489	yciG	orf, hypothetical protein [b1259]
A_07_P007238	501.2704	802.57153	99.49814	291.11432	0.29645753	0.8058324	-0.26585448	-0.45205784	946204	trpA	tryptophan synthase, alpha protein [b1260]
A_07_P007245	1316.5007	820.6396	649.74506	1135.514	0.07985973	-0.7716949	0.83163214	-0.098015785	947970	rpoH	RNA polymerase, sigma [b3461]
A_07_P007248	1427.5243	1248.7163	431.2522	555.1374	0.11664748	-0.24608731	0.16027188	-1.2104623	947969	ftsX	cell division membrane protein [b3462]
A_07_P007255	1015.74817	979.55634	326.7983	488.32468	0.09547353	-0.12653518	0.22993946	-0.92566776	947968	ftsE	ATP-binding component of a membrane-associated complex involved in cell division [b3463]
A_07_P007256	684.74774	686.9689	325.5637	315.25116	0.111189365	-0.05380535	0.8090925	-0.9723933	947978	ftsY	cell division membrane protein [b3464]
A_07_P007264	1832.934	2225.115	507.33017	971.6311	0.0827651	0.19282365	1.4328957E-4	-0.797421	947977	rsmD	orf, hypothetical protein [b3465]
A_07_P007266	1489.1198	1838.5111	309.2142	893.82184	0.2852285	0.41963983	-0.2120173	-0.4156835	947976	yhhL	orf, hypothetical protein [b3466]
A_07_P007271	514.75525	254.19585	122.90088	260.2541	0.6473479	-0.5402641	0.3514918	-0.30113018	947975	yhhM	putative receptor [b3467]
A_07_P007280	1135.7753	1039.766	222.81789	1281.7882	0.14216924	-0.1549151	-0.43703592	0.35213828	947973	yhhN	putative enzyme [b3468]
A_07_P007285	78.21859	76.36102	16.017841	56.502857	0.23022878	0.025887609	-0.2870674	-0.20347095	947972	zntA	zinc-transporting ATPase [b3469]
A_07_P007289	238.0045	229.52316	158.65242	219.174	0.04068947	-0.18132627	1.2261053	-0.042734504	947974	sirA	orf, hypothetical protein [b3470]
A_07_P007294	154.83678	104.837036	209.29561	99.42634	0.03231466	-0.6999513	2.2376437	-0.57124496	947984	yhhQ	orf, hypothetical protein [b3471]
A_07_P007298	684.2998	660.7226	238.27116	575.28186	0.038963556	-0.18128633	0.287475	-0.17590857	947983	dcrB	orf, hypothetical protein [b3472]
A_07_P007303	103.88953	121.50107	46.354652	110.82115	-0.24510646	-0.18885434	0.36116445	-0.116435885	947982	yhhS	putative transport [b3473]
A_07_P007307	133.28694	152.31262	29.911976	241.64386	-0.05196476	-0.029130578	-0.4371693	0.84187067	947980	yhhT	orf, hypothetical protein [b3474]
A_07_P007313	289.20395	370.4136	120.90094	259.44504	-0.12660229	0.060782075	0.38567185	-0.2477721	947979	acpT	orf, hypothetical protein [b3475]
A_07_P007316	254.83365	149.09633	35.557346	229.77318	0.5127605	-0.4302168	-0.55804086	0.39890277	947981	nikA	periplasmic binding protein for nickel [b3476]
A_07_P007322	178.66373	145.7174	52.730675	203.76273	-0.013973117	-0.47771347	-0.003970623	0.21115756	947986	nikB	transport of nickel, membrane protein [b3477]
A_07_P007329	161.72849	125.345436	29.229994	215.84615	0.41746688	-0.11986387	-0.28005004	0.8693843	947990	nikC	transport of nickel, membrane protein [b3478]
A_07_P007331	148.3272	140.01262	31.950962	155.17322	0.1111902	-0.1417023	-0.33312643	0.21177447	947989	nikD	ATP-binding protein of nickel transport system [b3479]
A_07_P007337	170.57053	171.77945	22.60426	169.53041	0.2637143	0.10423732	-0.8814522	0.29037857	947987	nikE	ATP-binding protein of nickel transport system [b3480]
A_07_P007343	445.23077	434.87006	129.47469	369.3898	0.11034083	-0.09329414	0.098992825	-0.123580694	947995	nikR	orf, hypothetical protein [b3481]
A_07_P007347	26.496227	25.007683	21.119282	31.576464	-0.07593715	-0.3290192	1.367372	0.21261346	947994	rhsB	rhsB protein in rhs element [b3482]
A_07_P007353	23.013596	26.47484	15.16334	19.376148	0.04384899	0.07631791	1.2124852	-0.16886783	947993	yhhH	orf, hypothetical protein [b3483]
A_07_P007358	20.488329	17.50413	14.27972	35.682	-0.33449566	-0.73126876	0.91520524	0.5013871	947992	yhhI	putative receptor [b3484]
A_07_P007361	101.375694	74.21428	11.976273	217.7624	0.34784305	-0.27176642	-0.9630824	1.4863746	947991	yhhJ	putative transporter [b3485]
A_07_P007367	176.89157	104.875786	18.602768	461.40283	0.28990102	-0.6339495	-1.1888399	1.7085502	947998	rbbA	putative ATP-binding component of a transport system, fragment 1 [b3486]
A_07_P007374	263.76126	127.603065	43.9982	720.40497	0.3971845	-0.82005143	-0.41599667	1.8822477	948003	yhiI	putative membrane protein [b3487]
A_07_P007380	5.777138	8.759162	4.5670986	6.185499	-0.67245233	-0.24168074	0.75900614	-0.538429	948001	yhiJ	orf, hypothetical protein [b3488]
A_07_P007381	22.818005	15.708266	14.724054	21.085274	-0.08245301	-0.790768	1.0560849	-0.1609019			orf, hypothetical protein [b3489]
A_07_P007386	21.023659	26.927635	13.3424635	24.643717	-0.21273422	-0.02532661	0.90181273	0.05196023	947999	yhiL	orf, hypothetical protein [b3490]
A_07_P007391	4.2785025	3.7103646	4.00115	7.649944	-0.15509188	-0.53030336	1.5187523	0.71873915	947997	yhiM	orf, hypothetical protein [b3491]
A_07_P007396	231.13074	274.45697	147.79095	232.08287	-0.2356968	-0.15749252	0.88968766	-0.19427764	947996	yhiN	orf, hypothetical protein [b3492]
A_07_P007401	2195.7153	2609.014	934.11383	1623.7539	0.01930356	0.09844971	0.5568173	-0.38056684	948009	pitA	low-affinity phosphate transport [b3493]
A_07_P007406	839.38293	412.658	120.02104	2400.47	0.46311402	-0.73093486	-0.5723928	2.0145173	948008	uspB	orf, hypothetical protein [b3494]
A_07_P007413	15665.143	13081.389	1130.4109	17338.984	0.15519357	-0.27451468	-1.8669093	0.33714342	948007	uspA	universal stress protein; broad regulatory function? [b3495]
A_07_P007419	335.64532	267.0296	88.91287	1148.7216	0.10758901	-0.39201498	-0.038348198	1.9180975	948006	yhiP	putative transport protein [b3496]
A_07_P007422	122.56775	127.62761	59.589962	111.411964	-0.021514773	-0.13281989	0.708583	-0.12370181	948005	yhiQ	orf, hypothetical protein [b3497]
A_07_P007426	675.25165	573.9289	188.26682	557.6281	0.14655614	-0.25766206	0.07444537	-0.09407759	948016	prlC	oligopeptidase A [b3498]
A_07_P007435	518.90967	712.1767	140.66768	605.5033	-0.081176996	0.20590854	-0.19383335	0.17696285	948012	yhiR	orf, hypothetical protein [b3499]
A_07_P007436	925.922	1186.5215	278.74402	641.0551	-0.0031495094	0.18495989	0.035435677	-0.49810386	948014	gor	glutathione oxidoreductase [b3500]
A_07_P007442	15.64749	20.910416	3.0687401	12.980475	0.15542352	0.4040476	-0.42425394	-0.07867658	948013	arsR	transcriptional repressor of chromosomal ars operon [b3501]
A_07_P007450	7.9113407	6.198625	4.791148	8.465723	0.17281497	-0.34882545	1.2197995	0.30601394	948011	arsB	arsenical pump membrane protein [b3502]
A_07_P007454	213.88438	241.98546	30.146517	178.69041	0.24275923	0.25118172	-0.8134737	0.018877983	948018	arsC	arsenate reductase [b3503]
A_07_P007460	5.23624	4.3209696	3.2052052	2.6231334	0.27465653	-0.17218578	1.3370775	-0.6870953	948017	yhiS	orf, hypothetical protein [b3504]
A_07_P007464	866.6433	515.49524	11.157719	1460.9302	0.60455394	-0.31459093	-3.904235	1.3934186	948022	slp	outer membrane protein induced after carbon starvation [b3506]
A_07_P007468	92.38558	105.71695	11.627874	533.5366	-0.10119307	-0.07639241	-1.3207381	2.4641428	948021	dctR	orf, hypothetical protein [b3507]
A_07_P007475	1312.4628	1514.0074	198.42645	1698.6862	-0.120069265	-0.083640814	-1.0751346	0.28756118	948019	yhiD	putative transport ATPase [b3508]
A_07_P007477	41162.05	41084.41	34.016064	42205.594	0.21332455	0.04093361	-8.257024	0.28493166	948026	hdeB	orf, hypothetical protein [b3509]
A_07_P007483	30666.34	29549.68	28.522598	28657.676	0.24499369	0.021815062	-8.054806	0.18274713	948025	hdeA	orf, hypothetical protein [b3510]
A_07_P007490	6630.108	5988.114	21.355211	3932.7488	0.7321582	0.41556025	-5.775607	0.014152288	948024	hdeD	orf, hypothetical protein [b3511]
A_07_P007494	2181.6382	1570.311	12.230905	6605.1904	0.46175003	-0.18227768	-5.2464514	2.095427	948023	gadE	orf, hypothetical protein [b3512]
A_07_P007496	303.37128	273.32413	8.930561	885.6742	0.29350162	-0.026635647	-3.022153	1.874681	948031	mdtE	putative membrane protein [b3513]
A_07_P007501	517.86755	497.07288	24.363546	406.3033	0.3710575	0.14226604	-2.2681937	0.056519985	948030	mdtF	putative transport system permease protein [b3514]
A_07_P007508	64.10327	73.037895	11.379792	227.7206	-0.009721756	0.008859396	-0.7331095	1.8545614	948029	gadW	putative ARAC-type regulatory protein [b3515]
A_07_P007513	1547.7173	2194.1165	217.3827	5332.256	-0.28128242	0.052550077	-1.3425797	1.5388105	948028	gadX	putative ARAC-type regulatory protein [b3516]
A_07_P007516	584.92126	498.76135	10.253205	811.67194	0.2201469	-0.17941165	-3.8434126	0.72828937	948027	gadA	glutamate decarboxylase isozyme [b3517]
A_07_P007522	97.83611	218.41194	17.141779	395.3202	-0.247931	0.7410152	-0.99024606	1.8021398	948038	yhjA	putative cytochrome C peroxidase [b3518]
A_07_P007526	61.623707	36.761223	15.874771	88.675095	0.030998468	-0.8839681	-0.15521562	0.59152997	948037	treF	cytoplasmic trehalase [b3519]
A_07_P007533	103.08712	86.82575	64.31192	151.72948	-0.31438577	-0.7317214	0.77544343	0.27873957	948036	yhjB	putative regulator [b3520]
A_07_P007536	106.8301	96.639534	43.82314	126.06071	-0.13332367	-0.447623	0.35165834	0.14096439	948035	yhjC	putative transcriptional regulator LYSR-type [b3521]
A_07_P007545	359.17178	373.9287	60.71085	1631.5868	0.019939423	-0.091637135	-0.7741729	2.2389565	948033	yhjD	orf, hypothetical protein [b3522]
A_07_P007550	179.84665	167.66866	31.105398	159.05608	0.12388992	-0.14693022	-0.63710415	-0.017853618	948032	yhjE	putative transport protein [b3523]
A_07_P007551	102.55998	62.74099	13.470561	161.21332	0.3644024	-0.5142517	-0.7936485	1.0523932	948043	yhjG	orf, hypothetical protein [b3524]
A_07_P007560	33.68089	37.625633	20.174229	96.19527	-0.33192658	-0.341807	0.6991921	1.2175971	948042	yhjH	orf, hypothetical protein [b3525]
A_07_P007564	528.928	311.0371	125.75816	235.17084	0.6009202	-0.33473086	0.2990365	-0.5329536	948041	kdgK	ketodeoxygluconokinase [b3526]
A_07_P007566	231.50092	202.8168	69.07365	136.79027	0.23186266	-0.12864411	0.25758755	-0.49170148	948040	yhjJ	orf, hypothetical protein [b3527]
A_07_P007574	574.82227	3223.8025	104.6715	8809.946	-0.6337917	1.6841173	-1.3205035	3.3396425	948039	dctA	uptake of C4-dicarboxylic acids [b3528]
A_07_P007579	1153.4224	1588.9287	393.6	1850.005	-0.18515301	0.10731387	0.034264088	0.5319438	948048	yhjK	orf, hypothetical protein [b3529]
A_07_P007585	425.99808	530.9261	68.40398	299.27353	0.2625265	0.41052485	-0.6056322	-0.21136737	948047	bcsC	putative oxidoreductase subunit [b3530]
A_07_P007586	297.35364	452.17963	88.5827	228.58719	0.01415205	0.44920182	0.037604094	-0.32979548	948046	bcsZ	putative endoglucanase [b3531]
A_07_P007591	546.6345	688.1333	147.6868	242.70755	0.036622286	0.19906735	-0.08087802	-1.099247	948045	bcsB	orf, hypothetical protein [b3532]
A_07_P007596	888.5188	938.28864	281.51572	454.32126	0.07881975	-0.012217283	0.19116867	-0.85338235	948053	bcsA	putative cellulose synthase [b3533]
A_07_P007604	285.33432	343.348	140.861	433.39612	-0.3750795	-0.27772808	0.37707472	0.2634418	948052	yhjQ	orf, hypothetical protein [b3534]
A_07_P007606	112.5183	156.94415	77.89221	140.68228	-0.349666	-0.039240837	0.89026034	0.008103132	948051	yhjR	orf, hypothetical protein [b3535]
A_07_P007611	1057.6176	1781.427	404.1363	1723.1898	-0.46985126	0.112696886	-0.08721995	0.2698996	948050	bcsE	putative protease [b3536]
A_07_P007618	1334.6035	2413.8105	447.4714	2658.7205	-0.289248	0.39598775	-0.095256805	0.74056053	948059	bcsF	orf, hypothetical protein [b3537]
A_07_P007623	238.2625	376.33282	52.61066	281.9336	-0.12374425	0.36604655	-0.53233325	0.15454745	948058	bcsG	orf, hypothetical protein [b3538]
A_07_P007629	161.52869	241.28058	53.86022	140.38815	-0.08701849	0.32223678	0.09901869	-0.25389957	948057	yhjV	putative transporter protein [b3539]
A_07_P007633	819.28345	1160.5443	68.777336	231.72177	0.8427944	1.1754937	-0.9610282	-0.9436873	948056	dppF	putative ATP-binding component of dipeptide transport system [b3540]
A_07_P007640	590.862	653.46967	27.543827	137.40259	1.0304432	1.0060756	-1.6220422	-1.038481	948065	dppD	putative ATP-binding component of dipeptide transport system [b3541]
A_07_P007643	793.57465	978.4568	66.76744	324.8298	0.61740065	0.7498765	-1.1832134	-0.6357925	948064	dppC	dipeptide transport system permease protein 2 [b3542]
A_07_P007648	518.23334	558.1031	37.879208	257.53915	0.58586025	0.52312374	-1.4177277	-0.3874613	948063	dppB	dipeptide transport system permease protein 1 [b3543]
A_07_P007652	9780.675	8306.254	251.75403	5813.379	0.49638414	0.09098244	-3.0129275	-0.21868491	948062	dppA	dipeptide transport protein [b3544]
A_07_P007657	869.1596	1110.1193	561.45776	809.7989	-0.19501185	-0.011656523	0.9450791	-0.2615819	948068	eptB	orf, hypothetical protein [b3546]
A_07_P007664	98.23356	100.48042	35.749332	76.15364	0.029714346	-0.10732508	0.34195042	-0.30209994	948066	yhjX	putative resistance protein [b3547]
A_07_P007669	126.21713	129.33862	60.67047	321.49072	-0.27251625	-0.406937	0.44117808	1.1118412	948073	yhjY	putative lipase [b3548]
A_07_P007673	232.39258	269.62277	59.03877	223.62318	0.016727328	0.06143868	-0.18956733	-0.0032789707	947137	tag	3-methyl-adenine DNA glycosylase I, constitutive [b3549]
A_07_P007676	157.83713	183.292	51.735966	140.7183	-0.04219067	0.0038505793	0.119148135	-0.17232871	946460	yiaC	orf, hypothetical protein [b3550]
A_07_P007683	288.731	284.43564	257.81747	213.64502	0.14407206	-0.047217607	1.7512317	-0.2549498	946915	bisC	biotin sulfoxide reductase [b3551]
A_07_P007687	1022.0078	661.50793	693.0805	271.8739	0.24540901	-0.5518329	1.4556332	-1.6294992	948075	yiaD	putative outer membrane protein [b3552]
A_07_P007692	165.46971	180.17752	55.277283	110.51642	0.08003795	0.03322363	0.26876497	-0.4667802	948074	ghrB	putative dehydrogenase [b3553]
A_07_P007698	1752.4122	2093.8445	386.76056	1672.5596	0.030142307	0.117287874	-0.37915254	-0.0016539097	948072	yiaF	orf, hypothetical protein [b3554]
A_07_P007703	968.6433	487.31503	34.82236	941.5786	0.76096153	-0.39981604	-2.266383	0.75556564	948071	yiaG	orf, hypothetical protein [b3555]
A_07_P007706	60795.06	142689.2	23621.344	26476.99	-0.2210989	0.8400843	0.18557334	-1.3848269	948070	cspA	cold shock protein 7.4, transcriptional activator of hns [b3556]
A_07_P007714	20.244612	18.498737	13.021264	19.00524	-0.022116303	-0.32189405	1.1117506	-0.07776952	948082	insJ	IS150 hypothetical protein [b3557]
A_07_P007716	13.519433	8.112488	5.856418	10.497265	0.011142135	-0.8953426	0.5747334	-0.31839108	948081	insK	IS150 putative transposase [b3558]
A_07_P007721	865.6207	1273.0072	132.95905	360.048	0.45683384	0.84360147	-0.4753834	-0.7732234	948080	glyS	glycine tRNA synthetase, beta subunit [b3559]
A_07_P007728	1219.6445	1588.1327	275.34232	869.9287	0.22035646	0.43156147	-0.15627038	-0.23164654	948079	glyQ	glycine tRNA synthetase, alpha subunit [b3560]
A_07_P007733	193.62497	128.27698	92.69199	168.96431	0.19475114	-0.5689174	0.90253866	0.033693433	948077	wecH	orf, hypothetical protein [b3561]
A_07_P007737	38.722744	30.372114	22.682049	87.410355	-0.41614878	-0.9362489	0.58275676	0.7939625	948078	yiaA	orf, hypothetical protein [b3562]
A_07_P007744	41.086033	50.210712	27.740593	163.01443	-1.0205015	-0.9008204	0.18338418	1.0032666	948152	yiaB	orf, hypothetical protein [b3563]
A_07_P007746	129.33363	108.65666	39.013462	217.87119	-0.009498954	-0.43048644	0.031983376	0.77836657	948133	xylB	xylulokinase [b3564]
A_07_P007753	148.70601	113.83204	36.543156	163.45306	0.11406016	-0.44116235	-0.14019406	0.28596246	948141	xylA	D-xylose isomerase [b3565]
A_07_P007757	82.77843	77.07889	65.03779	143.45003	-0.48193514	-0.75452054	0.9406235	0.34677434	948090	xylF	xylose binding protein transport system [b3566]
A_07_P007761	18.998188	15.045472	9.95397	64.11851	-0.65456843	-1.1607671	0.18344927	1.1357985	948127	xylG	putative ATP-binding protein of xylose transport system [b3567]
A_07_P007770	115.190926	130.18718	50.591526	150.14764	-0.2361207	-0.22922659	0.347355	0.1817224	948083	xylH	putative xylose transport, membrane component [b3568]
A_07_P007775	179.82567	162.70686	53.70924	196.7022	0.013946772	-0.30004358	0.041125536	0.17884922	948086	xylR	putative regulator of xyl operon [b3569]
A_07_P007778	325.75723	243.64882	211.60197	332.838	-0.106689334	-0.69535017	1.0414015	-0.040178537	948089	bax	putative ATP-binding protein [b3570]
A_07_P007781	6.3057876	4.796471	2.584967	11.209357	-0.18002415	-0.7443937	0.30398047	0.6854191	948088	malS	alpha-amylase [b3571]
A_07_P007786	861.8262	1450.8414	274.17935	701.09235	-0.06610918	0.515645	0.052149057	-0.32841325	948087	avtA	alanine-alpha-ketoisovalerate [b3572]
A_07_P007793	95.177704	100.07323	44.477955	77.78884	-0.015737295	-0.11304355	0.65726435	-0.27131033	948085	ysaA	orf, hypothetical protein [b3573]
A_07_P007799	779.64996	577.67426	144.43202	482.33344	0.5990062	-0.0032303333	-0.062894344	-0.05830145	948084	yiaJ	putative regulator [b3574]
A_07_P007803	25.152666	14.629711	8.493853	59.298767	-0.16062117	-1.1120977	0.0436939	1.1121578	948096	yiaK	putative dehydrogenase [b3575]
A_07_P007807	11.911737	8.237836	6.3948517	11.8264475	0.008050919	-0.6936618	0.8811854	0.033171892	948094	yiaL	putative lipase [b3576]
A_07_P007815	8.532872	4.2935257	2.8449073	8.380083	0.21169806	-0.94883657	0.39758396	0.22111976	948093	yiaM	orf, hypothetical protein [b3577]
A_07_P007818	45.34251	77.738075	44.275734	337.9579	-1.7043608	-1.0962696	0.031826615	1.2290351	949007	fadE	putative acyl-CoA dehydrogenase [b0221]
A_07_P007824	4960.6577	4747.8306	707.95325	3537.719	0.22666669	-0.0062630177	-0.81160355	-0.22555661	949134	lpcA	phosphoheptose isomerase [b0222]
A_07_P007830	428.67374	543.0653	87.74126	307.2868	0.2799983	0.45157743	-0.23801899	-0.16480792	944906	yafJ	putative amidotransferase [b0223]
A_07_P007831	794.1934	1555.9485	157.38235	1287.465	-0.2746253	0.5259402	-0.83930564	0.45783424	944910	yafK	orf, hypothetical protein [b0224]
A_07_P007836	6.5798764	5.8477526	8.952899	8.397661	-0.52786636	-0.86771095	1.6869633	-0.14045131	944911	yafQ	orf, hypothetical protein [b0225]
A_07_P007845	4.8470244	4.0842137	6.8621526	4.230935	-0.1258142	-0.54252183	2.1462831	-0.2864493	944914	dinJ	damage-inducible protein J [b0226]
A_07_P007847	34.12622	33.74255	18.412441	117.18406	-0.36630285	-0.5522809	0.51403266	1.4490088	944899	yafL	putative lipoprotein [b0227]
A_07_P007852	187.53348	219.42058	50.493782	415.32455	-0.09521532	-0.03833139	-0.21765053	1.0873635	944913	yafM	orf, hypothetical protein [b0228]
A_07_P007858	12.712204	8.291507	2.791047	22.056908	0.21322465	-0.57294977	-0.20357573	1.0437292	944908	lfhA	flagellar biosynthesis [b0229]
A_07_P007861	32.0148	23.311357	10.993096	52.610764	0.06493497	-0.56243706	0.29332948	0.8170428	944921	lafU	putative motility protein [b0230]
A_07_P007867	73.81504	45.526844	68.76697	84.553444	0.0022476912	-0.8646159	1.670584	0.23368466	944922	dinB	damage-inducible protein P; putative tRNA synthetase [b0231]
A_07_P007874	17.850632	16.720623	14.338234	17.418945	-0.16737115	-0.43138373	1.2870569	-0.16720068	944920	yafN	orf, hypothetical protein [b0232]
A_07_P007876	14.680061	6.6404786	7.9036283	17.821968	-0.12856102	-1.4427263	0.7487036	0.18672585	944916	yafO	orf, hypothetical protein [b0233]
A_07_P007881	64.25995	47.589703	67.246254	107.38494	-0.26389575	-0.8668325	1.572174	0.5123919	944912	yafP	orf, hypothetical protein [b0234]
A_07_P007889	66.61742	57.06196	119.50566	71.92487	-0.15619016	-0.54922676	2.457453	-0.010110736	944924	ykfJ	orf, hypothetical protein [b0235]
A_07_P007894	122.62496	133.19344	172.214	143.15926	-0.17405844	-0.22445416	2.086427	0.08479762	947374	prfH	probable peptide chain release factor [b0236]
A_07_P007896	3960.2349	4021.5515	348.81833	1678.7225	0.6379106	0.49041104	-1.096592	-0.5648236	945013	pepD	aminoacyl-histidine dipeptidase [b0237]
A_07_P007903	594.22314	488.93192	232.85129	316.64398	0.13090801	-0.32013035	0.5498469	-0.74174786	944817	gpt	guanine-hypoxanthine phosphoribosyltransferase [b0238]
A_07_P007907	587.99585	758.2638	94.76837	451.59592	0.2329793	0.4302063	-0.62981355	-0.112306595	946039	frsA	orf, hypothetical protein [b0239]
A_07_P007912	2763.5376	3070.6323	1143.0028	3937.923	-0.2660997	-0.2837472	0.23074675	0.28030634	945077	crl	transcriptional regulator of cryptic csgA gene for curli surface fibers [b0240]
A_07_P007916	163.38907	267.42688	150.26465	205.96037	-0.5214325	0.019734621	1.1282969	-0.15188956	944926	phoE	outer membrane pore protein E [b0241]
A_07_P007924	465.7943	451.214	115.213806	235.29002	0.25029612	0.03474927	0.0054523945	-0.69946826	946425	proB	gamma-glutamate kinase [b0242]
A_07_P007930	1044.4069	1032.5638	152.97702	414.22644	0.6944957	0.5083761	-0.3062662	-0.60420823	946680	proA	gamma-glutamylphosphate reductase [b0243]
A_07_P007934	13.284889	7.0894775	4.865664	12.626667	-0.025802493	-1.1015036	0.2956556	-0.06362653	946726	ykfI	orf, hypothetical protein [b0245]
A_07_P007936	27.253807	27.531357	11.080889	20.7603	0.06284964	-0.09219849	0.5350008	-0.2942928	944929	yafW	orf, hypothetical protein [b0246]
A_07_P007941	21.50695	18.929478	12.950206	24.757923	-0.1881342	-0.5419686	0.85057354	0.050441504	944930	ykfG	putative DNA repair protein [b0247]
A_07_P007946	55.135376	104.7688	18.30153	78.51587	-0.59443474	0.16205812	-0.41491306	-0.04894042	944931	yafX	orf, hypothetical protein [b0248]
A_07_P007952	102.83244	119.11475	97.20815	91.14055	-0.29398012	-0.25158894	1.3954098	-0.43262172	948839	ykfF	orf, hypothetical protein [b0249]
A_07_P007958	9.550534	11.541327	5.1298003	7.4136004	-0.3025484	-0.19905901	0.57130814	-0.6324675	946846	ykfB	orf, hypothetical protein [b0250]
A_07_P007962	36.657677	40.507725	28.53546	34.09206	-0.2967633	-0.322348	1.1124121	-0.36595476	944934	yafY	orf, hypothetical protein [b0251]
A_07_P007967	26.645224	30.54942	29.569654	29.940878	-0.33862245	-0.3110205	1.5821531	-0.13489461	945373	yafZ	orf, hypothetical protein [b0252]
A_07_P007974	8.33539	5.3112044	4.121056	6.6494837	0.001083374	-0.8187933	0.75538325	-0.28943574	949004	ykfA	putative GTP-binding protein [b0253]
A_07_P007979	11.180199	15.8241	5.1208096	9.946658	-0.28899646	0.04251468	0.3550371	-0.4221704	945417	perR	putative transcriptional regulator LYSR-type [b0254]
A_07_P007981	961.8416	1299.04	379.7597	1202.6581	-0.23446727	0.029441833	0.19535553	0.12337685			IS911 hypothetical protein, variant [b0255]
A_07_P007989	181.07098	297.99097	82.24225	232.23073	-0.43115366	0.11789298	0.20077789	-0.036661983	949005	insI	IS30 transposase [b0256]
A_07_P007992	529.7562	811.0884	255.53539	925.0129	-0.6248839	-0.18002033	0.09384596	0.2147491			putative transposase [b0257]
A_07_P007997	396.2995	447.38297	117.609795	198.48529	0.012870789	0.018123865	0.03082323	-0.9492004	944940	ykfC	orf, hypothetical protein [b0258]
A_07_P008004	12.39522	6.057397	3.5286505	10.110605	0.21421945	-0.98846114	0.17215931	-0.044207215	946284	mmuP	putative amino acid/amine transport protein [b0260]
A_07_P008006	12.090363	7.0697002	4.0031233	11.698684	0.22411478	-0.7196883	0.39999068	0.21209133	946143	mmuM	putative enzyme [b0261]
A_07_P008011	15.593947	10.784174	7.783997	21.2504	-0.13632059	-0.8380574	0.63181204	0.34567118	947676	afuC	putative ATP-binding component of a transport system [b0262]
A_07_P008017	349.31418	297.87418	364.00693	165.21739	-0.067709565	-0.46719825	1.762266	-1.1123805	947073	afuB	putative transport system permease protein [b0263]
A_07_P008028	1879.4028	2034.0293	1554.35	2953.5386	-0.43626165	-0.4918611	1.0603113	0.25139618	944946	insA	IS1 protein InsA [b0265]
A_07_P008033	16.30469	12.246615	6.1861005	17.25763	-0.08925724	-0.67182696	0.28309393	0.028178573	944944	yagB	orf, hypothetical protein [b0266]
A_07_P008036	11.843915	10.109093	8.768461	13.127506	-0.1728152	-0.570974	1.1639696	0.011119485	944937	yagA	orf, hypothetical protein [b0267]
A_07_P008042	5.4697566	2.9461794	2.6952648	8.291162	-0.24362671	-1.3059244	0.50585926	0.39195907	944925	yagE	putative lyase/synthase [b0268]
A_07_P008049	10.76457	5.826028	7.744613	12.439201	0.15880847	-0.8965639	1.454318	0.40289986	944928	yagF	putative dehydratase [b0269]
A_07_P008055	45.991882	54.94329	23.693071	40.933533	-0.17234457	-0.085446954	0.6412765	-0.3049525	944947	yagG	putative permease [b0270]
A_07_P008058	18.205593	12.138016	10.775484	18.120287	0.029835224	-0.7246803	1.0437415	0.058547497	944949	yagH	putative beta-xylosidase [b0271]
A_07_P008065	18.85698	20.590384	9.722557	23.258862	-0.17642045	-0.21921444	0.638424	0.16174924	945016	yagI	putative regulator [b0272]
A_07_P008066	29.24764	29.772213	13.531186	39.36366	-0.18670523	-0.33072543	0.471798	0.27732694	944844	argF	ornithine carbamoyltransferase 2, chain F [b0273]
A_07_P008071	14.313428	5.729854	5.615962	12.274279	0.15407729	-1.336388	0.5748487	-0.032165647	949094	yagJ	orf, hypothetical protein [b0276]
A_07_P008076	62.33363	73.86586	56.153725	55.698727	-0.27957082	-0.20433998	1.3403361	-0.40644908	945847	yagK	orf, hypothetical protein [b0277]
A_07_P008081	13.6000595	10.367874	6.457009	12.771761	0.08612275	-0.47503614	0.7819831	0.030955195	945845	yagL	DNA-binding protein [b0278]
A_07_P008088	9.271715	4.483643	5.0769906	6.8903413	0.13171697	-1.0861138	1.0333899	-0.2610557	944959	yagM	orf, hypothetical protein [b0279]
A_07_P008092	18.098291	11.715881	6.4845157	15.556838	0.10975087	-0.6873032	0.39950383	-0.07306552	945349	yagN	orf, hypothetical protein [b0280]
A_07_P008100	18.89197	12.445335	11.529108	17.556108	-0.078838944	-0.8506733	0.979204	-0.1491512	947351	intF	putative phage integrase [b0281]
A_07_P008101	8.53937	8.507827	3.8020515	8.304613	-8.4102154E-4	-0.17584622	0.60234284	-0.005569339	947411	yagP	putative transcriptional regulator LYSR-type [b0282]
A_07_P008109	22.917675	29.00749	10.099912	26.553993	-0.26760828	-0.09730923	0.3208096	-0.019651294	945010	yagQ	orf, hypothetical protein [b0283]
A_07_P008115	14.122344	9.978384	6.1310267	11.869707	0.123389244	-0.5473788	0.6901455	-0.091817856	944961	yagR	orf, hypothetical protein [b0284]
A_07_P008118	14.667946	9.932295	6.595232	16.568594	-0.06599629	-0.7981305	0.55136764	0.14527619	945710	yagS	orf, hypothetical protein [b0285]
A_07_P008122	10.216705	7.4283834	5.4418807	13.918638	-0.17215943	-0.8016354	0.6896235	0.30941677	945330	yagT	putative xanthine dehydrogenase [b0286]
A_07_P008129	9042.689	12030.898	510.19992	1714.9342	0.80867934	1.0509336	-1.5684023	-1.5544312	945677	yagU	orf, hypothetical protein [b0287]
A_07_P008131	105.40152	53.61825	66.12373	118.93407	-0.044045806	-1.1888113	1.0538348	0.16570878	945905	ykgJ	putative ferredoxin [b0288]
A_07_P008138	128.19476	166.7633	61.945644	180.4819	-0.388358	-0.1785599	0.33291447	0.14064658	946631	yagV	orf, hypothetical protein [b0289]
A_07_P008144	125.905106	151.87788	29.878262	284.42325	0.14336944	0.24427807	-0.16126359	1.3545606	947349	yagW	putative receptor [b0290]
A_07_P008148	59.181503	60.758427	20.97025	121.3263	-0.18094659	-0.3126756	0.09278619	0.89021575	947606	yagX	putative enzyme [b0291]
A_07_P008155	247.83475	356.48282	68.818695	876.53284	-0.25032485	0.1044631	-0.32829547	1.6075923	948806	matC	orf, hypothetical protein [b0292]
A_07_P008156	397.47226	614.4367	64.416756	1190.8369	-0.2416699	0.21707392	-1.0964804	1.3768678	948759	matB	orf, hypothetical protein [b0293]
A_07_P008164	1801.8162	2279.5002	696.5901	6165.055	-0.27430534	-0.10470557	0.12516046	1.535845	944966	matA	putative regulator [b0294]
A_07_P008167	19.250032	16.479359	12.678326	28.151506	-0.35518777	-0.7490547	0.812851	0.228652	944962	ykgL	orf, hypothetical protein [b0295]
A_07_P008172	45.219143	62.69093	23.499315	80.20375	-0.5690626	-0.26740563	0.25715804	0.29316163	944960	ykgM	putative ribosomal protein [b0296]
A_07_P008177	346.23642	198.71393	178.19029	219.26173	0.14349902	-0.82723236	0.9556954	-0.48011637	944957	eaeH	attaching and effacing protein, pathogenesis factor [b0297]
A_07_P008182	14.541301	13.809874	10.025969	17.825003	-0.21966815	-0.46379066	1.0144526	0.10956597	944952	insE	putative factor [b0298]
A_07_P008188	21.21994	16.70757	16.383196	25.700548	-0.031914473	-0.5464995	1.3654172	0.2799523	944948	insF	IS3 putative transposase [b0299]
A_07_P008194	27.206413	19.491077	13.366054	58.505024	-0.39188325	-1.0426824	0.35327882	0.7482184	944956	ykgA	putative ARAC-type regulatory protein [b0300]
A_07_P008196	623.1781	954.5752	453.01224	470.66327	-0.42269182	0.022855997	0.8877485	-0.7921531	944974	ykgB	orf, hypothetical protein [b0301]
A_07_P008205	46.95033	45.410255	33.15442	51.617313	-0.34933376	-0.56711686	0.91926754	-0.17712593			orf, hypothetical protein [b0302]
A_07_P008206	20.644934	18.87306	10.762847	30.907763	-0.16207981	-0.46120512	0.6687279	0.4555899	945658	ykgI	orf, hypothetical protein [b0303]
A_07_P008213	240.69354	199.27818	17.880322	217.92923	0.42350423	-0.018576026	-1.5567133	0.31565452	946092	ykgC	putative oxidoreductase [b0304]
A_07_P008220	37.726788	34.485497	19.513811	89.82755	-0.6312101	-0.9304755	0.1882317	0.6558471	945616	ykgD	putative ARAC-type regulatory protein [b0305]
A_07_P008225	489.8345	401.7274	133.938	590.03455	-0.00572896	-0.46147203	-0.10592222	0.29826522	948438	ykgE	putative dehydrogenase subunit [b0306]
A_07_P008226	310.66476	205.00989	53.490135	420.1092	0.30338526	-0.46594608	-0.4640925	0.7742796	944980	ykgF	orf, hypothetical protein [b0307]
A_07_P008233	529.0119	477.29547	199.51398	659.2994	-0.16624904	-0.48433256	0.1974765	0.18687272	945906	ykgG	putative transporter [b0308]
A_07_P008239	19.172382	13.623522	8.574806	31.113625	-0.23289871	-0.8954953	0.37678295	0.5011059			orf, hypothetical protein [b0309]
A_07_P008244	163.46754	197.83401	50.79134	162.64719	-0.10982394	-0.004204035	-0.025638223	-0.08159423	947513	ykgH	orf, hypothetical protein [b0310]
A_07_P008247	134.23315	251.34048	141.61092	140.77489	-0.28567767	0.44955826	1.5620494	-0.18154049	945716	betA	choline dehydrogenase, a flavoprotein [b0311]
A_07_P008251	774.8773	1171.7727	339.2014	908.8678	-0.31435657	0.11263013	0.2643534	-0.048764944	947376	betB	NAD+-dependent betaine aldehyde dehydrogenase [b0312]
A_07_P008258	440.45047	670.56995	328.91638	506.7855	-0.45579147	-0.019049168	0.8934846	-0.21790838	944981	betI	probably transcriptional repressor of bet genes [b0313]
A_07_P008264	383.27176	493.89188	240.0524	533.2461	-0.4345503	-0.23838973	0.6609669	0.07737136	945079	betT	high-affinity choline transport [b0314]
A_07_P008268	75.84307	95.875786	137.9505	135.34164	-0.60820925	-0.43972635	2.0253875	0.26279557	947459	yahA	orf, hypothetical protein [b0315]
A_07_P008272	114.179535	154.9938	73.208885	218.77173	-0.6568785	-0.38563812	0.4724437	0.31673193	945278	yahB	putative transcriptional regulator LYSR-type [b0316]
A_07_P008280	90.79974	80.60594	20.966465	154.56946	0.116871	-0.22459781	-0.22719824	0.9198543	947337	yahC	orf, hypothetical protein [b0317]
A_07_P008285	79.35752	88.90206	10.148662	115.83952	0.08935416	0.083537936	-1.1071877	0.67053115	947681	yahD	putative transcription factor [b0318]
A_07_P008288	35.022064	39.924606	13.649384	94.421265	-0.25126648	-0.23191893	0.15984082	1.2150693	947134	yahE	orf, hypothetical protein [b0319]
A_07_P008292	53.901108	60.56717	12.398861	109.14311	0.019052505	0.017607093	-0.33051986	1.0723746	947298	yahF	putative oxidoreductase subunit [b0320]
A_07_P008296	40.474815	36.34275	12.917471	65.22816	-0.13048339	-0.45550668	-0.007648647	0.5934752	945379	yahG	orf, hypothetical protein [b0321]
A_07_P008305	16.859741	36.12541	8.4157095	14.993483	-0.1484015	0.78136384	0.6197084	-0.2821604			orf, hypothetical protein [b0322]
A_07_P008306	24.656069	19.027716	10.521472	26.081907	-0.076248884	-0.6197555	0.46568054	0.040345907	944984	yahI	putative kinase [b0323]
A_07_P008312	59.296005	55.823112	16.947317	53.320152	0.08593285	-0.17080498	0.049590707	-0.031832814	944976	yahJ	putative deaminase [b0324]
A_07_P008320	1256.1609	1410.3494	49.03383	1705.4144	-0.031416178	-0.03405142	-2.9399807	0.44517374	944975	yahK	putative oxidoreductase [b0325]
A_07_P008325	12.128281	8.575244	6.024067	11.318188	0.037256956	-0.63253474	0.7982271	-0.026987076	944970	yahL	orf, hypothetical protein [b0326]
A_07_P008330	94.88098	96.06617	439.42184	150.29764	-0.38455832	-0.5363151	3.597393	0.31456113	944969	yahM	orf, hypothetical protein [b0327]
A_07_P008332	146.24689	137.96953	35.015305	484.3191	0.033492565	-0.22022998	-0.2583207	1.7965326	944968	yahN	putative cytochrome subunit of dehydrogenase [b0328]
A_07_P008337	1145.196	744.54364	83.63982	2658.0315	0.44316196	-0.34767056	-1.5615627	1.6934135	944985	yahO	orf, hypothetical protein [b0329]
A_07_P008344	27.713036	27.992662	15.334597	118.9255	-0.63703895	-0.7922213	0.27972174	1.4998704	944987	prpR	regulator for prp operon [b0330]
A_07_P008348	25.774319	25.722721	13.70557	47.063343	-0.21135545	-0.38391268	0.64800835	0.6928028	944990	prpB	putative phosphonomutase 2 [b0331]
A_07_P008351	34.09863	31.385553	13.7029295	83.562195	0.074287415	-0.21499228	0.52959347	1.4029121			orf, hypothetical protein [b0332]
A_07_P008356	41.029594	39.116405	16.776638	91.64986	-0.2689587	-0.5075165	0.21136504	0.9259962	947528	prpC	putative citrate synthase; propionate metabolism? [b0333]
A_07_P008362	45.865326	42.628513	16.327171	128.94786	-0.026126266	-0.3013779	0.25427967	1.5006732	945931	prpD	orf, hypothetical protein [b0334]
A_07_P008366	40.87687	36.333202	13.140865	79.26171	0.08844674	-0.2512157	0.22175783	1.0792743	946891	prpE	putative propionyl-CoA synthetase [b0335]
A_07_P008371	359.79745	329.14737	191.13388	343.00046	-0.10136771	-0.39948583	0.7565659	-0.13485444	944994	codB	cytosine permease/transport [b0336]
A_07_P008378	354.35495	516.6517	83.67725	259.6566	0.05433178	0.42866254	-0.2574196	-0.3587699	944996	codA	cytosine deaminase [b0337]
A_07_P008381	15.5863905	11.068359	5.046533	7.241959	0.38494635	-0.27856553	0.5285592	-0.68540084	945001	cynR	cyn operon positive regulator [b0338]
A_07_P008386	12.4347725	6.1561284	3.6372678	8.110428	0.41643393	-0.7675171	0.4135164	-0.16460776	946548	cynT	carbonic anhydrase [b0339]
A_07_P008395	5.483289	3.4532077	3.8974466	7.905627	-0.4854052	-1.3221756	0.79261816	0.07792139	948998	cynS	cyanate aminohydrolase, cyanase [b0340]
A_07_P008399	21.71573	19.511295	10.301148	17.717888	0.1022501	-0.22184694	0.7968505	-0.1557951	946770	cynX	cyanate transport [b0341]
A_07_P008405	899.1423	554.3347	234.97769	623.11053	0.21798325	-0.6494756	0.05249238	-0.27559018	945674	lacA	thiogalactoside acetyltransferase [b0342]
A_07_P008407	48.956	62.491768	12.20563	119.994194	-0.22252905	-0.0400151	-0.45593268	1.1063658	949083	lacY	galactoside permease [b0343]
A_07_P008412	33.034393	18.966497	8.164806	56.844994	0.1945647	-0.77561724	-0.05137819	1.0131168	945006	lacZ	beta-D-galactosidase [b0344]
A_07_P008419	640.5705	797.60895	284.7421	793.4488	-0.2719581	-0.12530017	0.3288753	0.072309494	945007	lacI	transcriptional repressor of the lac operon [b0345]
A_07_P008423	87.95005	175.81256	36.091442	346.57095	-0.77567816	0.053937316	-0.29017007	1.2382045	945938	mhpR	transcriptional regulator for mhp operon [b0346]
A_07_P008427	26.392384	15.367769	8.621262	62.19499	0.040180206	-0.9096997	0.19656515	1.3123454	945197	mhpA	3- [b0347]
A_07_P008433	23.925415	16.591736	8.985293	49.354725	0.107317924	-0.5904273	0.46494728	1.1874508	945047	mhpB	2,3-dihydroxyphenylpropionate 1,2-dioxygenase [b0348]
A_07_P008437	25.856709	27.094332	9.693257	56.433727	-0.17955756	-0.2817713	0.1754927	0.9819493	944954	mhpC	2-hydroxy-6-ketonona-2,4-dienedioic acid hydrolase [b0349]
A_07_P008443	28.745495	23.299103	8.609128	64.0823	0.17695427	-0.29577303	0.20809317	1.3690331	944768	mhpD	2-keto-4-pentenoate hydratase [b0350]
A_07_P008446	33.305836	30.822151	13.319869	40.26819	-0.0018134117	-0.2832868	0.4465273	0.30754077	945008	mhpF	acetaldehyde dehydrogenase [b0351]
A_07_P008451	18.255085	13.123302	5.7643666	28.328129	0.14532983	-0.50050414	0.25280076	0.8147547	945012	mhpE	4-hydroxy-2-ketovalerate aldolase [b0352]
A_07_P008458	46.216324	43.1732	14.75719	88.93389	-0.14788485	-0.4158181	-0.024334311	0.83193374	948454	pflD	formate acetyltransferase 2 [b3951]
A_07_P008463	55.321167	37.571465	15.894076	137.70314	0.113126874	-0.61473334	0.08432013	1.464273	948453	pflC	probable pyruvate formate lyase activating enzyme 2 [b3952]
A_07_P008469	340.23752	342.02823	67.69089	407.472	0.074629545	-0.08746338	-0.4843439	0.37027645	948452	frwD	PTS system fructose-like IIB component 2 [b3953]
A_07_P008474	349.20615	518.2546	119.39757	652.1733	-0.32551908	0.074397564	-0.10328877	0.611146	948451	yijO	putative ARAC-type regulatory protein [b3954]
A_07_P008480	1704.6243	2083.6836	207.3949	548.17676	0.5955093	0.7155256	-0.6729567	-1.0057428	948458	yijP	orf, hypothetical protein [b3955]
A_07_P008482	4366.909	5233.476	294.53793	1017.97174	0.98087835	1.0723686	-1.1386735	-1.0845487	948457	ppc	phosphoenolpyruvate carboxylase [b3956]
A_07_P008486	35.729134	44.060265	15.109571	35.888805	-0.085202694	0.04750824	0.44369447	-0.043281674	948456	argE	acetylornithine deacetylase [b3957]
A_07_P008494	483.85287	1851.7411	319.57974	1338.2423	-1.2798326	0.48674417	-0.10768843	0.22335458	948455	argC	N-acetyl-gamma-glutamylphosphate reductase [b3958]
A_07_P008499	1131.2511	5265.31	460.1233	2071.0076	-0.7577894	1.291143	-0.2850809	0.15011144	948464	argB	acetylglutamate kinase [b3959]
A_07_P008503	401.32315	2078.2898	129.75272	599.88824	-0.34000874	1.862886	-0.1984731	0.27540874	948463	argH	argininosuccinate lyase [b3960]
A_07_P008508	1471.4976	1614.197	336.6784	843.6417	0.22801614	0.19188094	-0.12929118	-0.5390792	948462	oxyR	activator, hydrogen peroxide-inducible genes [b3961]
A_07_P008514	783.56116	1132.4961	258.45532	2285.667	-0.2455411	0.116181135	-0.075136304	1.3344443	948461	sthA	putative oxidoreductase [b3962]
A_07_P008519	2565.2937	2809.8657	671.29736	2756.568	0.002191782	-0.03609824	-0.16137314	0.14142966	948460	fabR	orf, hypothetical protein [b3963]
A_07_P008525	935.3119	916.5748	235.66353	1120.8005	0.033723593	-0.165138	-0.18445957	0.3302214	948459	yijD	orf, hypothetical protein [b3964]
A_07_P008526	157.39766	140.9042	50.170933	105.247894	0.06491089	-0.26445448	0.18595636	-0.48022342	947143	trmA	tRNA [b3965]
A_07_P008533	135.04642	146.62315	105.3444	176.73285	-0.18377352	-0.23478222	1.2284201	0.23983002	948468	btuB	outer membrane receptor for transport of vitamin B12, E colicins, and bacteriophage BF23 [b3966]
A_07_P008540	1116.2991	1398.2084	342.00833	952.97504	-0.06586313	0.08932662	-0.0019483566	-0.2585883	948467	murI	glutamate racemase, required for biosynthesis of D-glutamate and peptidoglycan [b3967]
A_07_P008543	13.664028	8.420611	8.672234	13.483138	-0.0057178736	-0.87377	1.1089103	0.010543942	948470	murB	UDP-N-acetylenolpyruvoylglucosamine reductase [b3972]
A_07_P008550	1088.7112	1559.6628	694.03644	666.63074	-0.17634296	0.17260408	0.9446542	-0.8485162	948469	birA	biotin- [b3973]
A_07_P008552	823.945	964.1339	279.4364	941.60974	-0.13977456	-0.08275485	0.070732355	0.08829498	948479	coaA	pantothenate kinase [b3974]
A_07_P008557	20.466618	12.755036	10.221199	28.084864	-0.06650734	-0.91837955	0.70231956	0.4255005			orf, hypothetical protein [b3975]
A_07_P008561	105718.266	117533.805	20013.791	29339.799	0.32336354	0.3065498	-0.30725694	-1.4904408	948482	tufB	protein chain elongation factor EF-Tu [b3980]
A_07_P008570	22963.377	22566.021	3798.1165	10798.886	0.5896735	0.39482403	-0.23576975	-0.4632914	948486	secE	preprotein translocase [b3981]
A_07_P008575	13930.632	11557.28	2172.9807	5891.5645	0.6572845	0.21815991	-0.25269318	-0.54876566	948485	nusG	component in transcription antitermination [b3982]
A_07_P008576	20920.955	22878.346	3857.1577	6765.4644	0.46103406	0.4204023	-0.20776963	-1.1321661	948484	rplK	50S ribosomal subunit protein L11 [b3983]
A_07_P008585	25564.908	32616.271	4816.745	8049.3687	0.2829063	0.4646678	-0.35459256	-1.3488224	948483	rplA	50S ribosomal subunit protein L1, regulates synthesis of L1 and L11 [b3984]
A_07_P008588	70849.91	89984.44	11362.514	25684.326	0.35956955	0.53481364	-0.5103781	-1.06882	948490	rplJ	50S ribosomal subunit protein L10 [b3985]
A_07_P008595	108966.15	145821.2	20338.826	37883.223	0.2818401	0.53249335	-0.36919737	-1.2069211	948489	rplL	50S ribosomal subunit protein L7/L12 [b3986]
A_07_P008600	11539.241	12926.883	1479.9414	2502.038	0.64058113	0.6347413	-0.5518198	-1.5293036	948488	rpoB	RNA polymerase, beta subunit [b3987]
A_07_P008605	4844.4395	5903.0957	841.6626	1056.3647	0.4293387	0.5448148	-0.32514215	-1.7323947	948487	rpoC	RNA polymerase, beta prime subunit [b3988]
A_07_P008608	18.013084	17.384193	6.7000246	15.49003	0.34203124	0.12109542	0.68575996	0.15981436	948495	yjaZ	heat shock protein htrC [b3989]
A_07_P008611	65.60814	24.896233	126.99509	30.659676	0.45290685	-1.1147065	3.1762686	-0.60913706	948494	thiH	thiamin biosynthesis, thiazole moiety [b3990]
A_07_P008618	107.72728	36.868336	216.4972	45.462395	0.50570107	-1.2108945	3.2832017	-0.7034484	948493	thiG	thiamin biosynthesis, thiazole moiety [b3991]
A_07_P008624	241.17676	79.64181	557.06915	114.715996	0.3749777	-1.3931818	3.3532786	-0.66155887	948500	thiF	thiamin biosynthesis, thiazole moiety [b3992]
A_07_P008629	200.93614	71.46495	515.7294	78.399796	0.5220792	-1.1390162	3.652492	-0.80024815	948491	thiE	thiamin biosynthesis, thiazole moiety [b3993]
A_07_P008634	119.465935	62.124126	279.22055	69.10144	0.318658	-0.79438186	3.313999	-0.43566597	948492	thiC	thiamin biosynthesis, pyrimidine moiety [b3994]
A_07_P008637	405.2505	641.9265	207.74863	1652.4725	-0.6911011	-0.19717336	0.11545932	1.3721278	948496	rsd	putative transcriptional regulator [b3995]
A_07_P008643	364.2274	407.48004	135.75964	351.0879	-0.03988266	-0.04765892	0.30686808	-0.05740118	948498	nudC	orf, hypothetical protein [b3996]
A_07_P008648	544.9612	673.611	173.12622	457.1945	-0.026641369	0.10945606	0.089565635	-0.24449754	948497	hemE	uroporphyrinogen decarboxylase [b3997]
A_07_P008655	413.1542	575.44385	131.97273	366.98663	-0.048327684	0.2600007	0.07576752	-0.18379235	948502	nfi	endonuclease V [b3998]
A_07_P008660	1017.3999	1201.6313	366.38525	484.8031	-0.035914183	0.03452754	0.26116836	-1.0698423	948501	yjaG	orf, hypothetical protein [b3999]
A_07_P008662	16504.484	19433.354	3731.4446	8726.2	0.24476743	0.3107779	-0.12974954	-0.6391766	948499	hupA	DNA-binding protein HU-alpha [b4000]
A_07_P008667	75.49321	119.382256	52.108	115.63223	-0.6052438	-0.113740206	0.63044953	0.04536867	948508	yjaH	orf, hypothetical protein [b4001]
A_07_P008674	75.66833	38.65736	159.13033	1976.7484	-1.5030267	-2.6416395	1.3399559	3.2397575	948507	zraP	orf, hypothetical protein [b4002]
A_07_P008679	69.79196	75.07803	45.834015	165.32156	-0.6806475	-0.7449839	0.4832456	0.5989828	948506	zraS	sensor kinase for HydG, hydrogenase 3 activity [b4003]
A_07_P008684	271.40024	189.54646	153.48134	495.42447	-0.4358858	-1.1234232	0.51229	0.46784472	948505	zraR	response regulator of hydrogenase 3 activity [b4004]
A_07_P008690	124.76826	172.0356	20.481438	94.21113	0.10994768	0.40373778	-0.726379	-0.25984597	948504	purD	phosphoribosylglycinamide synthetase = GAR synthetase [b4005]
A_07_P008693	450.89883	549.74805	50.915565	385.56744	0.18955421	0.30585504	-1.186535	-7.7831745E-4	948503	purH	phosphoribosylaminoimidazolecarboxamideformyltransferase = AICAR formyltransferase; IMP cyclohydrolase [b4006]
A_07_P008699	310.0913	303.8144	420.29227	101.87931	-0.03556621	-0.23473513	2.1736689	-1.6059104	948515	yjaA	orf, hypothetical protein [b4011]
A_07_P008704	267.7426	306.10626	295.87622	336.4286	-0.22698998	-0.20346999	1.6876926	0.13795233	948514	yjaB	orf, hypothetical protein [b4012]
A_07_P008707	26.705248	14.412845	7.173099	17.125837	0.26603127	-0.7934027	0.14011228	-0.3394295	948513	metA	homoserine transsuccinylase [b4013]
A_07_P008715	35.55516	78.98211	12.530079	637.46954	-0.5825983	0.39920223	-0.3167264	3.6171157	948512	aceB	malate synthase A [b4014]
A_07_P008720	63.678394	169.3404	23.02389	1088.3579	-0.7283579	0.51302624	-0.4254945	3.402336	948517	aceA	isocitrate lyase [b4015]
A_07_P008721	23.17735	25.093826	18.48424	87.82589	-0.7382312	-0.7932806	0.7058843	1.2191881	944797	aceK	isocitrate dehydrogenase kinase/phosphatase [b4016]
A_07_P008728	478.59714	671.70215	267.672	674.3925	-0.35313308	-0.033789396	0.5790576	0.1771326	944933	arpA	regulator of acetyl CoA synthetase [b4017]
A_07_P008735	198.9198	442.3371	61.114613	704.5582	-0.47747028	0.5058229	-0.40953207	1.38255	948524	iclR	repressor of aceBA operon [b4018]
A_07_P008740	60.947086	104.19685	13.789109	73.95397	-0.18477678	0.41923904	-0.5582692	0.12978172	948522	metH	B12-dependent homocysteine-N5-methyltetrahydrofolate transmethylase, repressor of metE and metF [b4019]
A_07_P008744	77.33731	123.256256	30.870691	151.88933	-0.47051907	0.03223908	-0.024910092	0.5387533	948521	yjbB	putative alpha helix protein [b4020]
A_07_P008748	276.7117	253.02025	14.270932	175.26527	0.5955622	0.29676557	-1.911134	-0.027792692	948520	pepE	peptidase E, a dipeptidase where amino-terminal residue is aspartate [b4021]
A_07_P008752	116.89173	243.00777	53.753834	228.75136	-0.7679833	0.11818004	-0.11818111	0.23611224	948519	rluF	orf, hypothetical protein [b4022]
A_07_P008756	712.1748	1177.7974	144.68916	1281.4349	-0.23859572	0.31752586	-0.7673347	0.6443491	948518	pagB	orf, hypothetical protein [b4023]
A_07_P008761	1019.3185	1181.9076	73.91103	1352.1031	-0.028935432	0.014910936	-2.0440705	0.41415453	948531	lysC	aspartokinase III, lysine sensitive [b4024]
A_07_P008767	1022.2172	848.6893	113.458115	359.83267	0.95730495	0.5192454	-0.44363022	-0.5135107	948535	pgi	glucosephosphate isomerase [b4025]
A_07_P008773	158.78914	103.62331	250.90822	142.21834	-0.061127067	-0.846557	2.3694558	-0.18464363	948534	yjbE	orf, hypothetical protein [b4026]
A_07_P008777	52.3118	39.772865	50.88414	100.07286	-0.46494257	-1.0299608	1.2656722	0.5063875	948533	yjbF	orf, hypothetical protein [b4027]
A_07_P008783	54.32686	33.51537	48.878136	75.29573	-0.18752003	-1.0540291	1.4305391	0.31887066	948526	yjbG	orf, hypothetical protein [b4028]
A_07_P008788	53.205425	46.281048	30.618633	98.33738	-0.27287996	-0.6436982	0.70049226	0.64877427	948527	yjbH	orf, hypothetical protein [b4029]
A_07_P008791	580.91345	637.2492	195.47107	231.41792	0.03609419	-3.695488E-5	0.23526168	-1.2562399	948528	psiE	orf, hypothetical protein [b4030]
A_07_P008796	22.642365	18.232378	12.021179	21.562683	-0.12823582	-0.61042345	0.72885364	-0.16323543	948529	xylE	xylose-proton symport [b4031]
A_07_P008801	815.6446	1846.6902	354.60614	1577.9873	-1.087915	-0.0786531	-0.5191022	-0.100354195	948530	malG	part of maltose permease, inner membrane [b4032]
A_07_P008806	351.73416	360.91156	187.55493	447.13638	-0.06333959	-0.19584703	0.8000233	0.3183775	948532	malF	part of maltose permease, periplasmic [b4033]
A_07_P008811	567.0335	806.76776	16.942701	1616.7129	-0.10041165	0.2386415	-3.3945744	1.4466348	948538	malE	periplasmic maltose-binding protein; substrate recognition for transport and chemotaxis [b4034]
A_07_P008816	246.31485	458.81638	12.376002	646.4147	-0.34160757	0.38613963	-2.8859582	1.0858374	948537	malK	ATP-binding component of transport system for maltose [b4035]
A_07_P008822	829.67175	1781.6189	49.99917	6414.315	-0.73139596	0.20151448	-3.0134249	2.254775	948548	lamB	phage lambda receptor protein; maltose high-affinity receptor [b4036]
A_07_P008827	106.79772	141.70583	18.537125	269.82532	-0.05017495	0.18817651	-0.80603105	1.3224578	948547	malM	periplasmic protein of mal regulon [b4037]
A_07_P008831	44.96077	44.663834	27.631872	30.902777	0.08561313	-0.09361303	1.1538154	-0.419829	948546	yjbI	orf, hypothetical protein [b4038]
A_07_P008838	6745.004	10027.887	1421.7861	8091.177	-0.10009456	0.30236578	-0.57567334	0.1979239	948545	ubiC	chorismate lyase [b4039]
A_07_P008845	592.7633	580.6954	200.73123	536.2011	0.10462475	-0.09471655	0.31296957	-0.004568577	948540	ubiA	4-hydroxybenzoate-octaprenyltransferase [b4040]
A_07_P008846	541.42004	583.8003	128.4317	429.13477	0.11355686	0.052616358	-0.19165528	-0.1862731	948541	plsB	glycerol-3-phosphate acyltransferase [b4041]
A_07_P008852	216.8299	228.04523	95.2799	186.12804	0.010122895	-0.086787105	0.5943384	-0.17465699	948543	dgkA	diacylglycerol kinase [b4042]
A_07_P008857	784.5189	489.23355	800.45166	359.6933	0.36302066	-0.48793077	2.1625614	-0.7265332	948544	lexA	regulator for SOS [b4043]
A_07_P008863	312.2767	218.55333	391.89014	165.60725	0.27528048	-0.40922582	2.3734403	-0.6042912	948554	dinF	DNA-damage-inducible protein F [b4044]
A_07_P008870	1187.9467	484.00513	224.20496	1642.8759	0.3217535	-1.1432884	-0.31329072	0.82499504	948553	yjbJ	orf, hypothetical protein [b4045]
A_07_P008875	618.52045	645.8628	292.81348	396.40433	0.07524872	-0.03201127	0.766945	-0.5311122	948552	zur	putative regulator [b4046]
A_07_P008880	15.377637	11.961699	7.9625883	17.894953	-0.21613336	-0.7482114	0.6048775	0.03807354	948551	yjbL	orf, hypothetical protein [b4047]
A_07_P008885	12.370069	6.0033917	4.5712404	11.976891	0.082084656	-1.1305856	0.41642427	0.07097256	948550	yjbM	orf, hypothetical protein [b4048]
A_07_P008886	1128.8615	1119.2102	384.75574	536.9048	0.059611082	-0.12244296	0.27729273	-0.97703147	948558	dusA	orf, hypothetical protein [b4049]
A_07_P008894	546.87524	68.68831	2394.4224	66.0025	1.5205204	-1.6422215	5.4214497	-1.4946108	948557	pspG	orf, hypothetical protein [b4050]
A_07_P008897	341.28723	348.59058	51.516617	702.2408	0.089298725	-0.049819946	-0.86804175	1.1657667	948556	qor	quinone oxidoreductase [b4051]
A_07_P008903	2232.9553	2525.6997	472.85965	1100.6895	0.23759627	0.24565816	-0.23133945	-0.747463	948555	dnaB	replicative DNA helicase; part of primosome [b4052]
A_07_P008909	747.86926	1081.5718	198.02876	541.974	0.061529398	0.42413473	-0.085011244	-0.3675449	948564	alr	alanine racemase 1 [b4053]
A_07_P008914	1371.5675	2035.8573	187.96918	1622.7838	-0.13742065	0.26272368	-1.2341425	0.14071321	948563	tyrB	tyrosine aminotransferase, tyrosine repressible [b4054]
A_07_P008919	149.47394	167.81845	29.108624	396.11304	-0.034580946	-0.03724003	-0.6244215	1.4069254	948562	aphA	diadenosine tetraphosphatase [b4055]
A_07_P008923	1338.7042	1732.959	143.59143	1873.475	-0.083903074	0.118831396	-1.5341637	0.4364648	948561	yjbQ	orf, hypothetical protein [b4056]
A_07_P008926	438.65134	509.0498	70.549965	688.94574	-0.020137548	0.02492857	-0.88595974	0.66666627	948560	yjbR	orf, hypothetical protein [b4057]
A_07_P008933	1738.68	1178.4602	661.2954	773.63	0.4140718	-0.31668377	0.78998184	-0.7187166	948559	uvrA	excision nuclease subunit A [b4058]
A_07_P008940	1579.0558	1984.1372	464.73877	1414.1283	-0.029220581	0.13056159	-0.023255587	-0.1528821	948570	ssb	ssDNA-binding protein [b4059]
A_07_P008942	485.86118	282.4985	207.3546	100.23702	0.46839738	-0.48357058	1.0104884	-1.7732433	948569	yjcB	orf, hypothetical protein [b4060]
A_07_P008949	123.06668	144.67616	36.455006	345.20984	-0.0922488	-0.028527617	-0.076964736	1.4312725	948568	yjcC	orf, hypothetical protein [b4061]
A_07_P008951	3078.343	3556.2915	4807.9907	7850.875	-0.9927416	-0.9541881	1.4210744	0.3934462	948567	soxS	regulation of superoxide response regulon [b4062]
A_07_P008959	44.455906	38.81698	16.730972	57.508266	-0.11993599	-0.48528957	0.24074596	0.28694642	948566	soxR	redox-sensing activator of soxS [b4063]
A_07_P008961	690.8415	977.0439	194.52107	299.77087	0.17250824	0.5029104	0.11461568	-0.9964981	948565	yjcD	orf, hypothetical protein [b4064]
A_07_P008970	636.8702	770.5387	143.28677	673.0498	-0.056844234	0.048356533	-0.4384036	0.058356285	948577	yjcE	orf, hypothetical protein [b4065]
A_07_P008972	6.7842336	8.59889	2.9528456	10.097188	-0.5105319	-0.33823335	0.05992365	0.09865224	948576	yjcF	orf, hypothetical protein [b4066]
A_07_P008980	71.29287	105.60496	20.817818	390.19107	-0.2664522	0.13072908	-0.271856	2.221387	948575	actP	putative transport protein [b4067]
A_07_P008981	38.64253	73.304184	23.245298	201.54848	-0.99913144	-0.2450918	0.03815365	1.4192221	948574	yjcH	orf, hypothetical protein [b4068]
A_07_P008986	183.70067	439.5247	65.03157	1670.2239	-0.37472665	0.7141937	-0.10233629	2.8453748	948572	acs	acetyl-CoA synthetase [b4069]
A_07_P008994	139.8974	70.61937	22.609364	191.60687	0.42094684	-0.7349528	-0.43789476	0.9102149	948571	nrfA	periplasmic cytochrome c [b4070]
A_07_P008996	72.66513	35.916916	11.810924	120.19818	0.27454567	-0.9117209	-0.57606065	1.0361131	948573	nrfB	formate-dependent nitrite reductase; a penta-haeme cytochrome c [b4071]
A_07_P009001	100.01397	71.94404	18.89664	230.38017	0.19171679	-0.45320427	-0.4417479	1.4310195	948581	nrfC	formate-dependent nitrite reductase; Fe-S centers [b4072]
A_07_P009010	197.90941	213.7935	85.33241	278.84668	-0.37826777	-0.43655705	0.17859268	0.15185189	948580	nrfD	formate-dependent nitrate reductase complex; transmembrane protein [b4073]
A_07_P009012	40.31897	34.437134	15.137194	81.46868	-0.009116888	-0.40627682	0.3480577	1.0411577	948579	nrfE	formate-dependent nitrite reductase; possible assembly function [b4074]
A_07_P009020	52.103523	58.716293	18.330141	111.03809	-0.16679394	-0.16407955	0.09657866	0.9602963	948578	nrfF	part of formate-dependent nitrite reductase complex [b4075]
A_07_P009024	56.58189	57.265785	15.403809	108.73038	9.6321106E-4	-0.15136993	-0.10555452	0.9787946	948592	nrfG	part of formate-dependent nitrite reductase complex [b4076]
A_07_P009026	1346.0942	1626.3987	733.0956	570.65656	-0.10757542	-0.0043399334	0.78625417	-1.3101721	948591	gltP	glutamate-aspartate symport protein [b4077]
A_07_P009034	247.02905	270.01822	77.564995	228.74046	0.020344853	-0.02094543	0.119677186	-0.055136085	948586	yjcO	orf, hypothetical protein [b4078]
A_07_P009037	2805.4949	5397.384	58.46072	570.27	1.3717492	2.146088	-2.4423597	-0.89130116	948584	fdhF	selenopolypeptide subunit of formate dehydrogenase H [b4079]
A_07_P009042	11.8414	3.3492866	7.058659	11.766695	-0.03652501	-2.0281053	0.9876368	-0.010167122	945833	paaA	orf, hypothetical protein [b1388]
A_07_P009046	16.188898	12.680142	6.328889	15.334373	-0.0406425	-0.5627426	0.37491226	-0.08338988	947595	paaB	orf, hypothetical protein [b1389]
A_07_P009052	11.955786	11.498522	5.212809	15.123506	-0.20375192	-0.42967868	0.36920768	0.17082	945956	paaC	orf, hypothetical protein [b1390]
A_07_P009057	12.913109	13.919625	5.878351	19.322369	-0.40565312	-0.46703553	0.22952926	0.21127045	945959	paaD	orf, hypothetical protein [b1391]
A_07_P009062	110.95196	193.20816	80.77921	163.1245	-0.63660085	-0.0060459375	0.6760552	-0.04507482	945962	paaE	putative oxidoreductase [b1392]
A_07_P009069	16.450712	15.289757	6.70378	13.859653	-0.05704856	-0.3322996	0.41838354	-0.26881957	946011	paaF	putative enzyme [b1393]
A_07_P009075	10.707635	5.8682666	6.0145087	11.985882	-0.07029033	-1.1075902	0.8681241	0.12789404	946263	paaG	putative enzyme [b1394]
A_07_P009078	13.920419	8.919777	5.0288677	11.67509	0.061424613	-0.7503644	0.3630631	-0.15685594	945940	paaH	putative enzyme [b1395]
A_07_P009084	13.711549	15.699241	8.159739	13.149127	-0.18375838	-0.15812135	0.83798057	-0.20869458	945265	paaI	orf, hypothetical protein [b1396]
A_07_P009088	16.702726	10.735364	10.263615	14.625876	-0.015797377	-0.823176	1.0521934	-0.17186964	946121	paaJ	putative acyltransferase [b1397]
A_07_P009092	14.134111	3.9075155	2.972723	8.234354	1.0133479	-1.0111762	0.53455913	0.26938212	945963	paaK	orf, hypothetical protein [b1398]
A_07_P009097	17.678713	17.149027	10.491531	23.303362	-0.42447293	-0.6380261	0.59327424	0.009539962	945966	paaX	orf, hypothetical protein [b1399]
A_07_P009101	8.462038	4.262657	5.4178367	6.856735	-0.070901394	-1.2298201	1.0563458	-0.33889687	945965	paaY	putative transferase [b1400]
A_07_P009108	10.913689	8.035968	5.3747096	14.113047	-0.3221631	-0.9334245	0.42649198	0.08421576			split orf [b1401]
A_07_P009118	14.915144	8.606277	7.4815426	10.21939	0.111974955	-0.85100794	0.88714033	-0.3980056			split orf [b1405]
A_07_P009122	3.984311	3.1730907	1.8015195	4.4107914	-0.043184638	-0.5412924	0.582235	0.13901055	945980	ydbC	putative dehydrogenase [b1406]
A_07_P009130	18.930712	9.130632	3.900251	13.253082	0.6549177	-0.5666901	0.14636362	0.17600536	945983	ydbD	orf, hypothetical protein [b1407]
A_07_P009133	7.8614235	3.4796278	1.8271874	3.8717735	0.80669236	-0.5388315	0.47206187	-0.1796155	945973	ynbA	probable enzyme [b1408]
A_07_P009140	16.607834	9.603424	8.134123	13.250851	0.17093551	-0.78897345	0.9116661	-0.11935496	945972	ynbB	putative phosphatidate cytidiltransferase [b1409]
A_07_P009144	16.004322	12.8344755	8.976427	15.168064	-0.18154466	-0.6696477	0.7547425	-0.22348094	945970	ynbC	orf, hypothetical protein [b1410]
A_07_P009148	10.404805	5.3006735	4.9278593	9.13306	-0.0022591352	-1.1449279	0.69005954	-0.15485024	945985	ynbD	putative enzymes [b1411]
A_07_P009153	2043.8737	1578.5413	84.13578	581.54974	1.2905893	0.74820876	-1.541318	-0.48725462	947569	azoR	acyl carrier protein phosphodiesterase [b1412]
A_07_P009158	778.11206	902.4095	172.67122	392.23096	0.15837312	0.20251155	-0.24304175	-0.7944138	948444	hrpA	helicase, ATP-dependent [b1413]
A_07_P009162	403.8612	211.08784	130.34114	196.82933	0.57036185	-0.535321	0.70933044	-0.43106437	946215	ydcF	orf, hypothetical protein [b1414]
A_07_P009166	170.28055	367.72995	80.323975	869.45844	-0.80851007	0.13255668	-0.12198639	1.5791814	945672	aldA	aldehyde dehydrogenase, NAD-linked [b1415]
A_07_P009173	707.53265	204.02191	32.241215	1014.504	0.99947214	-0.96426725	-1.6858114	1.5548663			glyceraldehyde-3-phosphate dehydrogenase [b1416]
A_07_P009180	535.36774	150.74957	22.457838	701.6663	1.0644164	-0.9336256	-1.7402867	1.49016			glyceraldehyde 3-phosphate dehydrogenase C, interrupted [b1417]
A_07_P009183	856.2493	1266.4629	340.213	592.8127	-0.25985813	0.13517833	0.17908454	-0.75482464	947241	cybB	cytochrome b [b1418]
A_07_P009190	263.90182	316.51193	100.24746	237.56186	-0.10624015	-0.013648272	0.26785922	-0.22245002	945986	ydcA	orf, hypothetical protein [b1419]
A_07_P009195	49.67963	55.58895	17.49842	77.24703	-0.21854985	-0.22607255	0.046555698	0.45376337	948820	mokB	orf, hypothetical protein [b1420]
A_07_P009199	501.99628	673.78876	194.90643	217.60469	-0.11004853	0.14490509	0.29559243	-1.2805277	945995	trg	methyl-accepting chemotaxis protein III, ribose sensor receptor [b1421]
A_07_P009204	418.25766	1481.2902	228.62633	1687.3414	-1.2079668	0.44675636	-0.3088317	0.83980966	948865	ydcI	putative transcriptional regulator LYSR-type [b1422]
A_07_P009209	44.761135	65.75767	23.026188	522.26904	-0.6659372	-0.28069162	0.14562714	2.9140253	945991	ydcJ	orf, hypothetical protein [b1423]
A_07_P009213	931.4113	1337.4694	260.39142	834.61414	-0.032589674	0.3197596	-0.100789785	-0.15540934	945994	mdoD	putative glycoprotein [b1424]
A_07_P009216	26.076832	27.4338	12.397969	38.95105	-0.36673427	-0.46321452	0.33113664	0.2476474			orf, hypothetical protein [b1425]
A_07_P009222	311.48978	295.4195	46.261684	2063.5027	0.17744923	-0.06863725	-0.80331004	2.9407752	945997	ydcH	orf, hypothetical protein [b1426]
A_07_P009230	79.33935	133.54626	32.846977	541.60443	-0.41940153	0.16216314	0.07885802	2.3872178	945998	rimL	acetylation of N-terminal serine of 30S ribosomal subunit protein L7; acetyl transferase [b1427]
A_07_P009234	48.967346	53.31985	24.472734	99.20015	-0.35223567	-0.3990488	0.41765547	0.7017745	944932	ydcK	orf, hypothetical protein [b1428]
A_07_P009237	378.55215	423.49246	86.04464	315.47775	0.1374793	0.12965679	-0.22932053	-0.089986324	945852	tehA	tellurite resistance [b1429]
A_07_P009242	355.0262	382.96735	40.678463	194.0634	0.44509053	0.38471985	-0.909963	-0.3908193	945979	tehB	tellurite resistance [b1430]
A_07_P009250	1131.4006	1538.2927	108.714455	2219.3582	-0.16786265	0.105691195	-1.7768214	0.8396578	948203	ydcL	orf, hypothetical protein [b1431]
A_07_P009252	331.5545	227.34225	149.42325	252.00703	0.27037644	-0.44367027	0.8910705	-0.08991718	944942	ydcM	putative virulence protein [b1432]
A_07_P009256	121.87411	136.5532	54.337917	152.878	-0.1268624	-0.13245666	0.47831273	0.23561573	947247	ydcO	putative membrane transport protein [b1433]
A_07_P009265	65.839005	53.090576	26.51125	68.899925	-0.08498895	-0.5651418	0.37320852	0.016059518	946000	ydcN	orf, hypothetical protein [b1434]
A_07_P009266	419.41995	253.98723	117.76721	265.37198	0.2941935	-0.5991118	0.23227191	-0.33069694	945993	ydcP	putative collagenase [b1435]
A_07_P009272	118.72759	108.048386	77.759384	141.10907	-0.18136132	-0.4870051	0.9786078	0.10328233	945990	yncJ	orf, hypothetical protein [b1436]
A_07_P009276	216.17413	253.37364	97.52824	165.3049	-0.14426064	-0.08485448	0.47797287	-0.49583662			orf, hypothetical protein [b1437]
A_07_P009282	21.393438	23.267174	10.701332	41.83376	-0.45656586	-0.50510466	0.31459135	0.54642093	946001	ydcQ	orf, hypothetical protein [b1438]
A_07_P009286	25.271912	78.1363	22.9151	63.602165	-1.28715	0.17164135	0.34214902	0.079879165	946004	ydcR	multi modular; putative transcriptional regulator; also putative ATP-binding component of a transport system [b1439]
A_07_P009293	30.95526	45.601223	10.486454	276.66434	-0.2634232	0.1257987	-0.054545164	2.931945	946005	ydcS	putative transport protein [b1440]
A_07_P009296	67.11168	96.80577	18.667267	501.53986	-0.23738062	0.121481895	-0.31289828	2.6998358	946007	ydcT	putative ATP-binding component of a transport system [b1441]
A_07_P009303	56.540874	66.32603	10.797351	305.65173	-0.040136814	0.020477772	-0.6582179	2.4298742	945976	ydcU	putative transport system permease protein [b1442]
A_07_P009310	70.844765	102.152084	23.141243	202.03181	-0.42413104	-0.06581223	-0.2677908	1.1232067	945903	ydcV	putative transport system permease protein [b1443]
A_07_P009311	119.16677	124.94529	14.8712845	258.79468	-0.009234786	-0.11058664	-1.2410802	1.1450788	945876	ydcW	putative aldehyde dehydrogenase [b1444]
A_07_P009317	225.1619	452.2729	212.32286	197.58301	-0.14694703	0.6896174	1.5388856	-0.29996252	945936	ydcX	orf, hypothetical protein [b1445]
A_07_P009325	1279.0789	1349.445	527.85846	608.4636	0.04131174	-0.05109358	0.5349648	-0.9950621	945916	ydcY	orf, hypothetical protein [b1446]
A_07_P009328	209.2633	371.29468	92.8364	228.11517	-0.37314975	0.2844298	0.22482848	-0.21321869	946008	ydcZ	orf, hypothetical protein [b1447]
A_07_P009334	240.4059	433.59558	78.59662	248.265	-0.0766629	0.60454774	0.08093941	0.005233288	946010	yncA	putative resistance protein [b1448]
A_07_P009340	21.456442	14.159707	11.911106	20.705381	-0.102967024	-0.87225294	0.8184651	-0.11888373	946012	yncB	putative oxidoreductase [b1449]
A_07_P009341	7.7406197	10.11047	8.044625	12.567572	-0.7619041	-0.54624164	1.0642076	-0.027231216	946014	yncC	orf, hypothetical protein [b1450]
A_07_P009346	152.57312	253.9169	75.21678	166.18144	-0.27702725	0.2881626	0.4731338	-0.11828053	946015	yncD	putative outer membrane receptor for iron transport [b1451]
A_07_P009354	287.90115	665.4072	78.27109	758.9844	-0.50688267	0.532115	-0.6153699	0.9271016	946006	yncE	putative receptor [b1452]
A_07_P009360	42.99878	47.35865	43.507565	36.579166	-0.045975804	-0.07630992	1.7415302	-0.2437613	946019	ansP	L-asparagine permease [b1453]
A_07_P009363	47.69673	59.632263	33.972267	51.70822	-0.48167682	-0.32914054	0.79932594	-0.3296852	946023	yncG	putative transferase [b1454]
A_07_P009367	6.189705	4.51471	4.9601617	7.515241	-0.40321016	-1.0281137	1.0478419	-0.087773204	946024	yncH	orf, hypothetical protein [b1455]
A_07_P009372	9.335289	9.499389	5.8327417	11.003304	-0.21951675	-0.36404288	0.87249815	0.053141594	946026	rhsE	rhsE protein in rhs element [b1456]
A_07_P009376	8.073681	6.6683064	4.334044	8.884636	-0.12849212	-0.5740646	0.74453056	0.045081973	946958	ydcD	orf, hypothetical protein [b1457]
A_07_P009383	11.963492	10.156366	7.4003196	13.833409	-0.27995145	-0.68587184	0.79760486	-0.03494513			orf, hypothetical protein [b1458]
A_07_P009389	30.347118	25.203238	19.340624	26.336544	0.0035721064	-0.43404448	1.1241825	-0.16543281	945121	yncI	orf, hypothetical protein [b1459]
A_07_P009391	22.391489	17.51864	8.627381	54.784245	0.011306405	-0.5124197	0.4058857	1.3376046	947435	ydcC	putative receptor [b1460]
A_07_P009396	9.007041	7.336808	5.7219625	11.949439	-0.5726037	-1.0381705	0.5433886	-0.12929785	945731	pptA	orf, hypothetical protein [b1461]
A_07_P009403	40.165493	37.817585	7.216449	153.24078	0.045020103	-0.21154535	-0.66103977	2.01228	946192	yddH	orf, hypothetical protein [b1462]
A_07_P009406	104.224785	88.88987	25.428476	132.73784	0.10613203	-0.29314125	-0.15851343	0.49050176	947251	nhoA	putative N-hydroxyarylamine O-acetyltransferase [b1463]
A_07_P009415	62.054764	92.51924	16.847849	77.88925	-0.18368149	0.22286367	-0.2941237	0.17968905	944782	yddE	orf, hypothetical protein [b1464]
A_07_P009416	19.471199	12.160137	7.506735	12.64852	0.29153204	-0.5573164	0.68698335	-0.2953527	946029	narV	cryptic nitrate reductase 2, gamma subunit [b1465]
A_07_P009423	15.221032	20.33118	3.655477	13.466515	0.14670336	0.39466476	-0.14069605	0.0055015087	946032	narW	cryptic nitrate reductase 2, delta subunit, assembly function [b1466]
A_07_P009426	58.244404	53.218983	10.234486	64.43158	0.27575982	-0.024085283	-0.46238554	0.4568962	946034	narY	cryptic nitrate reductase 2, beta subunit [b1467]
A_07_P009431	85.4788	103.550316	10.003915	72.18802	0.07571077	0.18273842	-1.2487555	-0.1326083	945999	narZ	cryptic nitrate reductase 2, alpha subunit [b1468]
A_07_P009436	1284.4583	256.78064	65.306786	621.4421	2.1578276	-0.33439088	-0.36942065	1.1458476	945799	narU	nitrite extrusion protein 2 [b1469]
A_07_P009441	15.447306	10.593266	7.761795	14.930164	-0.015711308	-0.7295853	0.7619313	-0.029348135	945955	yddJ	orf, hypothetical protein [b1470]
A_07_P009450	12.972888	8.769058	5.8388515	10.003932	0.053767443	-0.68090475	0.67255986	-0.28567684	947312	yddK	putative glycoportein [b1471]
A_07_P009454	11.0854645	5.0012765	5.384916	12.432781	-0.044694185	-1.3626612	0.68416774	0.1562736	945737	yddL	putative outer membrane porin protein [b1472]
A_07_P009458	235.58067	261.40686	52.156162	178.61076	0.25087273	0.23128188	-0.15390313	-0.1130414	945942	yddG	orf, hypothetical protein [b1473]
A_07_P009461	254.25626	291.8878	30.230202	109.9191	0.75595355	0.7854177	-0.5457319	-0.41839945	946035	fdnG	formate dehydrogenase-N, nitrate-inducible, alpha subunit [b1474]
A_07_P009468	333.2017	418.3287	40.06894	149.85295	0.6091145	0.7676897	-0.6761899	-0.50824535	948794	fdnH	formate dehydrogenase-N, nitrate-inducible, iron-sulfur beta subunit [b1475]
A_07_P009475	2761.2861	2705.601	413.03595	766.0005	0.6236682	0.42461085	-0.34679747	-1.1907666	946038	fdnI	formate dehydrogenase-N, nitrate-inducible, cytochrome B556 [b1476]
A_07_P009480	16.420986	17.583046	9.82954	21.918957	-0.32659757	-0.3976195	0.703593	0.12552881	946040	yddM	orf, hypothetical protein [b1477]
A_07_P009481	961.68335	1453.6503	101.54749	1868.0375	-0.3606584	0.06572127	-1.8335301	0.63271856	946036	adhP	alcohol dehydrogenase [b1478]
A_07_P009486	1966.5603	2204.5054	195.617	1459.2112	0.2188375	0.21395254	-1.3401974	-0.17615938	946031	maeA	NAD-linked malate dehydrogenase [b1479]
A_07_P009495	83.03203	23.774027	20.045238	78.50126	0.27424145	-1.6997067	-0.0056313872	0.22877705	946041	bdm	orf, hypothetical protein [b1481]
A_07_P009499	1012.27936	951.2373	107.11549	1505.9493	-0.003303051	-0.2626996	-1.4731354	0.6052511	946043	osmC	osmotically inducible protein [b1482]
A_07_P009501	17.85033	19.732792	8.940438	18.593517	-0.110990524	-0.13601232	0.6620116	-0.01665318	946020	ddpF	putative ATP-binding component of a transport system [b1483]
A_07_P009506	7.674178	6.1166368	2.836099	9.812887	0.017387986	-0.4795518	0.35181892	0.4075414	946002	ddpD	putative ATP-binding component of a transport system [b1484]
A_07_P009514	21.512894	21.067844	11.863898	18.282082	-0.047426343	-0.24725199	0.8644855	-0.24670959	946028	ddpC	putative transport protein [b1485]
A_07_P009517	9.5581	12.150945	4.936552	6.4739237	0.009670258	0.18627644	0.82698536	-0.5169252	946044	ddpB	putative transport system permease protein [b1486]
A_07_P009522	21.225306	12.967516	10.584644	22.0691	-0.12383962	-1.0043889	0.6428833	-0.03210914	946052	ddpA	putative hemin-binding lipoprotein [b1487]
A_07_P009526	9.928422	3.7105205	4.9502482	18.606125	0.036329508	-1.5532796	0.80280155	0.9779589	945532	ddpX	orf, hypothetical protein [b1488]
A_07_P009534	54.097862	62.605453	20.730534	159.75702	-0.25161088	-0.21056056	0.13510996	1.3461132	945815	dos	putative enzyme [b1489]
A_07_P009536	105.12764	187.56714	39.824783	339.00055	-0.4836855	0.18191326	-0.11355364	1.240948	945835	yddV	orf, hypothetical protein [b1490]
A_07_P009544	96.22983	76.01895	17.849533	156.52434	0.19698834	-0.31280303	-0.4630744	0.934307	945975	yddW	orf, hypothetical protein [b1491]
A_07_P009546	15826.307	11255.284	205.4961	28771.887	0.25485897	-0.40652943	-4.241676	1.1526818	946057	gadC	acid sensitivity protein, putative transporter [b1492]
A_07_P009551	16960.627	11395.625	26.787125	23701.473	0.40057588	-0.34279823	-7.135322	0.9188516	946058	gadB	glutamate decarboxylase isozyme [b1493]
A_07_P009559	30.676361	24.320986	18.137192	54.896534	-0.52821195	-1.032804	0.48414695	0.34686387	946059	pqqL	putative peptidase [b1494]
A_07_P009562	15.904221	10.126549	7.5909724	18.78035	-0.17894161	-0.99987495	0.5245408	0.09636116	945961	yddB	orf, hypothetical protein [b1495]
A_07_P009570	31.58707	29.976217	13.532427	29.503689	-0.013426065	-0.25860822	0.53419584	-0.07637668	945945	yddA	putative ATP-binding component of a transport system [b1496]
A_07_P009574	43.427685	37.225525	14.000772	162.6594	-0.16720748	-0.5591968	-0.029780567	1.7734479	945981	ydeM	putative enzyme [b1497]
A_07_P009578	866.6158	291.21017	26.520847	919.7868	0.6849284	-1.0580697	-2.57473	0.8063226	945957	ydeN	putative sulfatase [b1498]
A_07_P009584	28.435266	15.058084	9.964448	24.547337	0.126912	-0.9598975	0.38462782	-0.049714923	945922	ydeO	putative ARAC-type regulatory protein [b1499]
A_07_P009587	16.087772	9.087312	12.522121	15.083495	-0.12700701	-1.1207124	1.2820427	-0.18451285	946061	yneN	orf, hypothetical protein [b1500]
A_07_P009593	104.14806	58.221905	37.25521	70.33172	0.21990848	-0.7887598	0.50732195	-0.31099224	946055	ydeP	putative oxidoreductase, major subunit [b1501]
A_07_P009596	44.360973	38.53567	21.852596	45.446636	-0.11016488	-0.4829272	0.63888454	-0.039794207	946050	ydeQ	putative adhesin; similar to FimH protein [b1502]
A_07_P009604	31.008026	25.821121	22.380835	41.40745	-0.16325629	-0.5970125	1.1369011	0.2894807	946049	ydeR	putative fimbrial-like protein [b1503]
A_07_P009609	62.133698	63.71233	29.900906	98.93954	-0.2795719	-0.41304195	0.4357766	0.42708707	946047	ydeS	putative fimbrial-like protein [b1504]
A_07_P009612	28.78794	21.333906	17.10545	34.042507	-0.23405576	-0.836038	0.7854712	0.04330504	946042	ydeT	putative outer membrane protein [b1505]
A_07_P009617	11.06698	6.911148	5.3738074	8.329121	0.12004888	-0.72888184	0.8483391	-0.25448895	946063	yneL	orf, hypothetical protein [b1506]
A_07_P009624	39.5339	33.5821	15.915942	85.46411	-0.1989485	-0.6040132	0.2589686	0.9487674	946064	hipA	persistence to inhibition of murein or DNA biosynthesis, DNA-binding regulator [b1507]
A_07_P009626	65.005806	52.758114	25.65104	85.41198	-0.10573232	-0.5765743	0.32325184	0.3236258	946065	hipB	persistence to inhibition of murein or DNA biosynthesis; regulatory protein [b1508]
A_07_P009633	13.942982	7.7910795	4.700034	14.535872	0.20946181	-0.79984856	0.41120112	0.30502844	947796	ydeU	putative ATP-binding component of a transport system and adhesin protein [b1509]
A_07_P009640	129.69662	114.11743	56.783157	69.48016	0.09560263	-0.2586856	0.6745323	-0.76937664	947790	ydeK	orf, hypothetical protein [b1510]
A_07_P009641	28.86517	29.12073	11.338189	43.066807	-0.17458546	-0.33153498	0.2478103	0.43814933	945230	citF	citrate lyase alpha chain [b0615]
A_07_P009650	75.59393	62.10173	23.702541	96.688095	0.15046465	-0.30283844	0.2477715	0.54102075	945406	citE	citrate lyase beta chain [b0616]
A_07_P009653	22.637201	15.599986	8.676187	30.807404	-0.052572846	-0.75938976	0.33439988	0.4274968	945415	citD	citrate lyase acyl carrier protein [b0617]
A_07_P009656	20.982916	14.3000765	4.3747725	56.74798	0.25199068	-0.470868	-0.23940921	1.7228328	945231	citC	citrate lyase synthetase [b0618]
A_07_P009663	112.83843	85.33196	43.16321	77.63465	0.21785891	-0.354908	0.6020098	-0.2861389	945233	dpiB	putative sensor-type protein [b0619]
A_07_P009666	383.72174	321.1254	100.26005	238.86949	0.31988788	-0.10670221	0.15410924	-0.3284626	947008	dpiA	sequence similarity to Shigella regulator [b0620]
A_07_P009671	151.68033	94.127556	37.685947	99.87157	0.33260846	-0.52540267	0.09420836	-0.23479176	945000	dcuC	transport of dicarboxylates [b0621]
A_07_P009676	55.58985	37.114624	17.998962	58.24681	0.041415453	-0.7110847	0.18504304	0.14426076	946360	pagP	orf, hypothetical protein [b0622]
A_07_P009684	15834.176	30414.191	2615.6934	26912.951	-0.22896051	0.5430758	-1.0562015	0.5717864	947024	cspE	cold shock protein [b0623]
A_07_P009690	1266.3038	1185.1842	363.30545	661.2316	0.23794436	-0.027234077	0.20711088	-0.6639638	945798	crcB	orf, hypothetical protein [b0624]
A_07_P009694	163.0333	136.85065	40.418385	332.24536	0.05421257	-0.36801827	-0.18733466	1.1167836			orf, hypothetical protein [b0625]
A_07_P009697	212.43875	167.27167	54.15776	468.2957	0.06212926	-0.45239103	-0.13914251	1.2379899	4056041	ybeM	putative amidase [b0626]
A_07_P009703	1076.348	940.8718	285.13916	589.7838	0.3634739	-2.667904E-4	0.21760249	-0.46892357	945228	tatE	orf, hypothetical protein [b0627]
A_07_P009709	6472.5996	5428.672	1553.2211	2704.9429	0.35348916	-0.06992245	0.06494212	-0.8697698	945227	lipA	lipoate synthesis, sulfur insertion? [b0628]
A_07_P009714	36.470623	36.34943	25.819338	31.783272	-0.10540116	-0.27987015	1.1668513	-0.2683804	945219	ybeF	putative transcriptional regulator LYSR-type [b0629]
A_07_P009718	693.0709	604.14197	184.65285	434.24927	0.30246377	-0.06531739	0.16481233	-0.33652735	945217	lipB	protein of lipoate biosynthesis [b0630]
A_07_P009724	731.00946	562.33435	446.30984	596.48486	0.15411973	-0.39400983	1.2128098	-0.10379791	945220	ybeD	orf, hypothetical protein [b0631]
A_07_P009726	5238.966	4050.0088	895.20844	1890.7297	0.8151355	0.27411246	0.03668475	-0.6197159	945222	dacA	D-alanyl-D-alanine carboxypeptidase, fraction A; penicillin-binding protein 5 [b0632]
A_07_P009735	1135.8429	1071.1978	245.2706	814.25305	0.33075404	0.07654953	-0.11002767	-0.11397171	945241	rlpA	a minor lipoprotein [b0633]
A_07_P009737	787.9788	1029.5065	331.55844	385.9818	-0.002657652	0.21339989	0.5189842	-0.996794	945238	mrdB	rod shape-determining membrane protein; sensitivity to radiation and drugs [b0634]
A_07_P009743	555.8233	590.6531	255.28137	190.25238	-0.00907135	-0.091053724	0.638926	-1.5202951	945240	mrdA	cell elongation, e phase; peptidoglycan synthetase; penicillin-binding protein 2 [b0635]
A_07_P009747	1920.5995	2256.1592	793.5626	1126.0807	8.196831E-4	0.06346655	0.49621487	-0.73393774	945239	ybeA	orf, hypothetical protein [b0636]
A_07_P009752	2862.7307	3581.5583	1104.5233	1761.0066	-0.040574074	0.11295557	0.3559928	-0.7060778	945237	ybeB	orf, hypothetical protein [b0637]
A_07_P009759	688.81366	1122.4755	179.65843	457.99548	0.113289356	0.6481204	-0.05503261	-0.44000292	945246	cobC	homolog of Salmonella cobC, a phosphohistidine protein [b0638]
A_07_P009762	314.03772	499.204	81.890015	208.43153	0.050539255	0.5495651	-0.11810386	-0.50533724	945248	nadD	orf, hypothetical protein [b0639]
A_07_P009769	747.5811	1004.0483	170.20442	410.67038	0.22248101	0.47834182	-0.14194489	-0.60627985	947573	holA	DNA polymerase III, delta subunit [b0640]
A_07_P009773	861.55505	897.93115	144.74193	309.12695	0.51667523	0.40667033	-0.2862494	-0.9265802	946257	rlpB	a minor lipoprotein [b0641]
A_07_P009777	1596.105	1670.9197	267.123	586.1847	0.513006	0.4094274	-0.29543757	-0.8966334	947497	leuS	leucine tRNA synthetase [b0642]
A_07_P009784	755.5319	442.09183	69.451515	1700.9469	0.50698805	-0.4358256	-1.1658912	1.7132487	945252	ybeL	putative alpha helical protein [b0643]
A_07_P009787	227.23438	331.6163	155.50436	208.74335	-0.24309647	0.13257074	0.9802129	-0.33005953	945251	ybeQ	orf, hypothetical protein [b0644]
A_07_P009794	52.599655	99.68616	348.61752	38.377438	-0.06661582	0.6860579	4.43244	-0.4859228	945249	ybeR	orf, hypothetical protein [b0645]
A_07_P009800	3285.4846	2976.0747	1255.1947	2664.4895	0.053101778	-0.25925946	0.43544245	-0.21365714	945245	djlB	putative enzyme of polynucleotide modification [b0646]
A_07_P009802	37.338383	30.588894	14.667044	65.17859	-0.011274815	-0.46859276	0.41117895	0.8279518	945243	ybeT	orf, hypothetical protein [b0647]
A_07_P009808	39.237904	38.80664	14.922135	60.82264	-0.12426257	-0.3098731	0.2514792	0.5435859	945244	ybeU	putative tRNA ligase [b0648]
A_07_P009811	128.49594	81.026375	31.61501	105.560776	0.18966603	-0.6452594	-0.06283963	-0.058495045	945253	djlC	orf, hypothetical protein [b0649]
A_07_P009817	31.054293	24.518179	15.063249	60.168434	-0.31407368	-0.8246808	0.4127018	0.6756283	945218	hscC	putative dnaK protein [b0650]
A_07_P009825	291.94376	401.09454	30.429901	944.4086	0.0057109594	0.2942965	-1.4858823	1.7349203	945503	rihA	putative tRNA synthetase [b0651]
A_07_P009830	895.3067	2374.2668	44.597397	706.8805	0.24754119	1.4849033	-2.309274	-0.057885885	945254	gltL	ATP-binding protein of glutamate/aspartate transport system [b0652]
A_07_P009831	1362.3849	4115.631	63.23813	1310.5494	-0.08771157	1.3376007	-2.7463725	-0.108186245	947354	gltK	glutamate/aspartate transport system permease [b0653]
A_07_P009836	682.8073	1904.7522	60.932926	890.2667	-0.25831032	1.052077	-1.9739592	0.15993762	945443	gltJ	glutamate/aspartate transport system permease [b0654]
A_07_P009841	2630.399	5164.799	70.81674	4785.016	-0.5518186	0.25194597	-3.9963307	0.34691095	946938	gltI	putative periplasmic binding transport protein [b0655]
A_07_P009848	596.72107	769.33044	222.4429	602.6614	-0.102856636	0.094023705	0.24405694	-0.053077698	946201	lnt	apolipoprotein N-acyltransferase, copper homeostasis protein, inner membrane [b0657]
A_07_P009852	2177.228	2636.4934	523.29645	2218.2903	0.053261995	0.1597228	-0.23299527	0.11570549	946417	ybeX	putative transport protein [b0658]
A_07_P009856	6694.8037	8144.4146	1326.987	8709.995	-0.042382002	0.07072091	-0.6067338	0.37273645	946430	ybeY	orf, hypothetical protein [b0659]
A_07_P009865	2575.6772	2829.313	464.58734	3256.0974	0.05039549	0.016228676	-0.6499984	0.42407608	948044	ybeZ	putative ATP-binding protein in pho regulon [b0660]
A_07_P009866	2206.7317	2102.6965	490.67416	1128.4108	0.41379905	0.1744628	0.015261173	-0.51833224	945260	miaB	orf, hypothetical protein [b0661]
A_07_P009874	650.9802	544.7037	135.86935	418.27203	0.45306444	0.026255608	-0.03679359	-0.14961958	945261	ubiF	orf, hypothetical protein [b0662]
A_07_P009880	139.12845	99.50478	87.22522	79.12066	0.3033216	-0.34992468	1.4002564	-0.47548175			putative RNA [b0663]
A_07_P009885	1744.5781	858.4562	2078.43	589.86884	0.53701234	-0.65571547	2.5601645	-0.9919112			putative RNA [b0671]
A_07_P009887	99.701385	163.58862	31.159544	31.942135	0.0511235	0.5958439	0.14371955	-1.5555413	945281	asnB	asparagine synthetase B [b0674]
A_07_P009895	564.0286	754.6689	160.77602	566.4008	-0.018706799	0.23170185	-0.058887243	0.022836924	945283	nagD	N-acetylglucosamine metabolism [b0675]
A_07_P009896	161.55699	195.85611	39.824837	178.2427	-0.0030107498	0.10507369	-0.25277805	0.17427766	945285	nagC	transcriptional repressor of nag [b0676]
A_07_P009903	624.4176	483.16983	93.47507	613.3516	0.3020451	-0.237602	-0.66727674	0.31173587	945289	nagA	N-acetylglucosamine-6-phosphate deacetylase [b0677]
A_07_P009910	816.19037	490.14056	63.410316	664.2637	0.6887939	-0.21658158	-1.2267861	0.42713308	945290	nagB	glucosamine-6-phosphate deaminase [b0678]
A_07_P009911	571.9307	692.9133	83.53204	781.51117	-0.012854338	0.094313145	-1.0177575	0.47305918	945292	nagE	PTS system, N-acetylglucosamine-specific enzyme IIABC [b0679]
A_07_P009919	2360.775	2361.8877	469.05594	862.38184	0.44494247	0.27595663	-0.115950346	-0.9724302	945310	glnS	glutamine tRNA synthetase [b0680]
A_07_P009924	40.52841	77.31595	17.425497	118.58413	-0.7631402	-9.7465515E-4	-0.21033859	0.8212528	945296	ybfM	orf, hypothetical protein [b0681]
A_07_P009926	22.799051	26.932158	18.447462	52.42219	-0.57822967	-0.50753987	0.8867544	0.6584623	945713	ybfN	orf, hypothetical protein [b0682]
A_07_P009932	3109.3923	3821.3862	1024.648	3592.3396	-0.097453594	0.030344725	0.071578026	0.14632583	945295	fur	negative regulator [b0683]
A_07_P009938	3383.611	3872.2996	1246.254	2387.8345	0.026883602	0.05184436	0.35645342	-0.44048977	945293	fldA	flavodoxin 1 [b0684]
A_07_P009941	380.6192	415.12445	338.6789	234.41011	0.02498293	-0.019487858	1.6270877	-0.6388427	945291	ybfE	orf, hypothetical protein [b0685]
A_07_P009949	312.61108	285.19626	100.21268	259.51382	0.07494259	-0.22713757	0.20417404	-0.15812755	945288	ybfF	orf, hypothetical protein [b0686]
A_07_P009955	1871.2681	2289.2842	649.33716	1813.3455	-0.09854555	0.0226686	0.14501381	-0.108418465	945272	seqA	negative modulator of initiation of replication [b0687]
A_07_P009956	3368.7275	2566.2893	693.88226	2194.9287	0.44646168	-0.11572504	-0.06244421	-0.13608074	945271	pgm	phosphoglucomutase [b0688]
A_07_P009965	20.895382	15.377352	10.90052	23.84363	-0.10107827	-0.7131219	0.73067	0.12482977	945274	ybfP	putative pectinase [b0689]
A_07_P009970	14.684873	11.179327	7.4797463	14.711223	-0.11137676	-0.6745405	0.6858896	-0.07330203	945287	ybfG	orf, hypothetical protein [b0690]
A_07_P009971	14.635106	8.4067335	8.896505	15.148294	-0.01032722	-0.9798093	1.0420861	0.07488334	945287	ybfG	orf, hypothetical protein [b0691]
A_07_P009978	1889.0508	2347.3347	174.74117	3152.826	-0.092918396	0.050777912	-1.7567536	0.6815531	945422	potE	putrescine transport protein [b0692]
A_07_P009981	504.97336	639.0256	30.048462	1143.9303	-0.035964847	0.13403487	-2.3362737	1.1792428	945297	speF	ornithine decarboxylase isozyme, inducible [b0693]
A_07_P009988	165.95284	132.06732	72.66323	99.819786	0.34818673	-0.1509794	0.9272469	-0.3497007	945302	kdpE	regulator of kdp operon [b0694]
A_07_P009994	833.2812	638.8465	308.16742	298.4278	0.41714954	-0.13585043	0.7525958	-1.0287833	946744	kdpD	sensor for high-affinity potassium transport system [b0695]
A_07_P009996	1163.4109	657.3698	298.49982	159.96054	0.5806112	-0.41263795	0.38858867	-2.2464733	947508	kdpC	high-affinity potassium transport system [b0696]
A_07_P010003	2109.616	1292.7277	590.95886	185.94173	0.5764866	-0.2997415	0.5111718	-2.8920827	947450	kdpB	ATPase of high-affinity potassium transport system, B chain [b0697]
A_07_P010006	5013.8604	2247.5347	1351.6849	232.31725	0.73026204	-0.59698296	0.6096349	-3.6660042	946045	kdpA	ATPase of high-affinity potassium transport system, A chain [b0698]
[truncated: 8,692 more rows]
